# Supplementary material
Source: Research Square preprint supplement (doi:10.21203/rs.3.rs-9943031/v1)
Supplement: Supplementary file 1 [file 0670363e9024050d3a432d22.docx]

Supplementary Information for

**Decoupling Na⁺ Solvation and Interfacial Chemistry via Dual-Anion Synergy Enables Wide-Temperature Sodium-Ion Batteries**

Danning Yu1,3, Qiao Zhang2,3, Xingxing Yin2, Li Liu1, Min Zhou1, Mingjiong Zhou1*, Jun Wang2*, and Xing Xin1*

1 School of Material Science and Chemical Engineering, Ningbo University, Ningbo 315211, P. R. China

2 Department of Materials Science & Engineering, School of Innovation and Entrepreneurship, Southern University of Science and Technology, Shenzhen 518055, P. R. China

3 These authors contributed equally to this work.

*Corresponding authors.

E-mail addresses: [zhoumingjiong@nbu.edu.cn](mailto:zhoumingjiong@nbu.edu.cn) (M. J. Zhou); [xinxing@nbu.edu.cn](mailto:xinxing@nbu.edu.cn) (X. Xin); [wangj9@sustech.edu.cn](mailto:wangj9@sustech.edu.cn) (J. Wang).


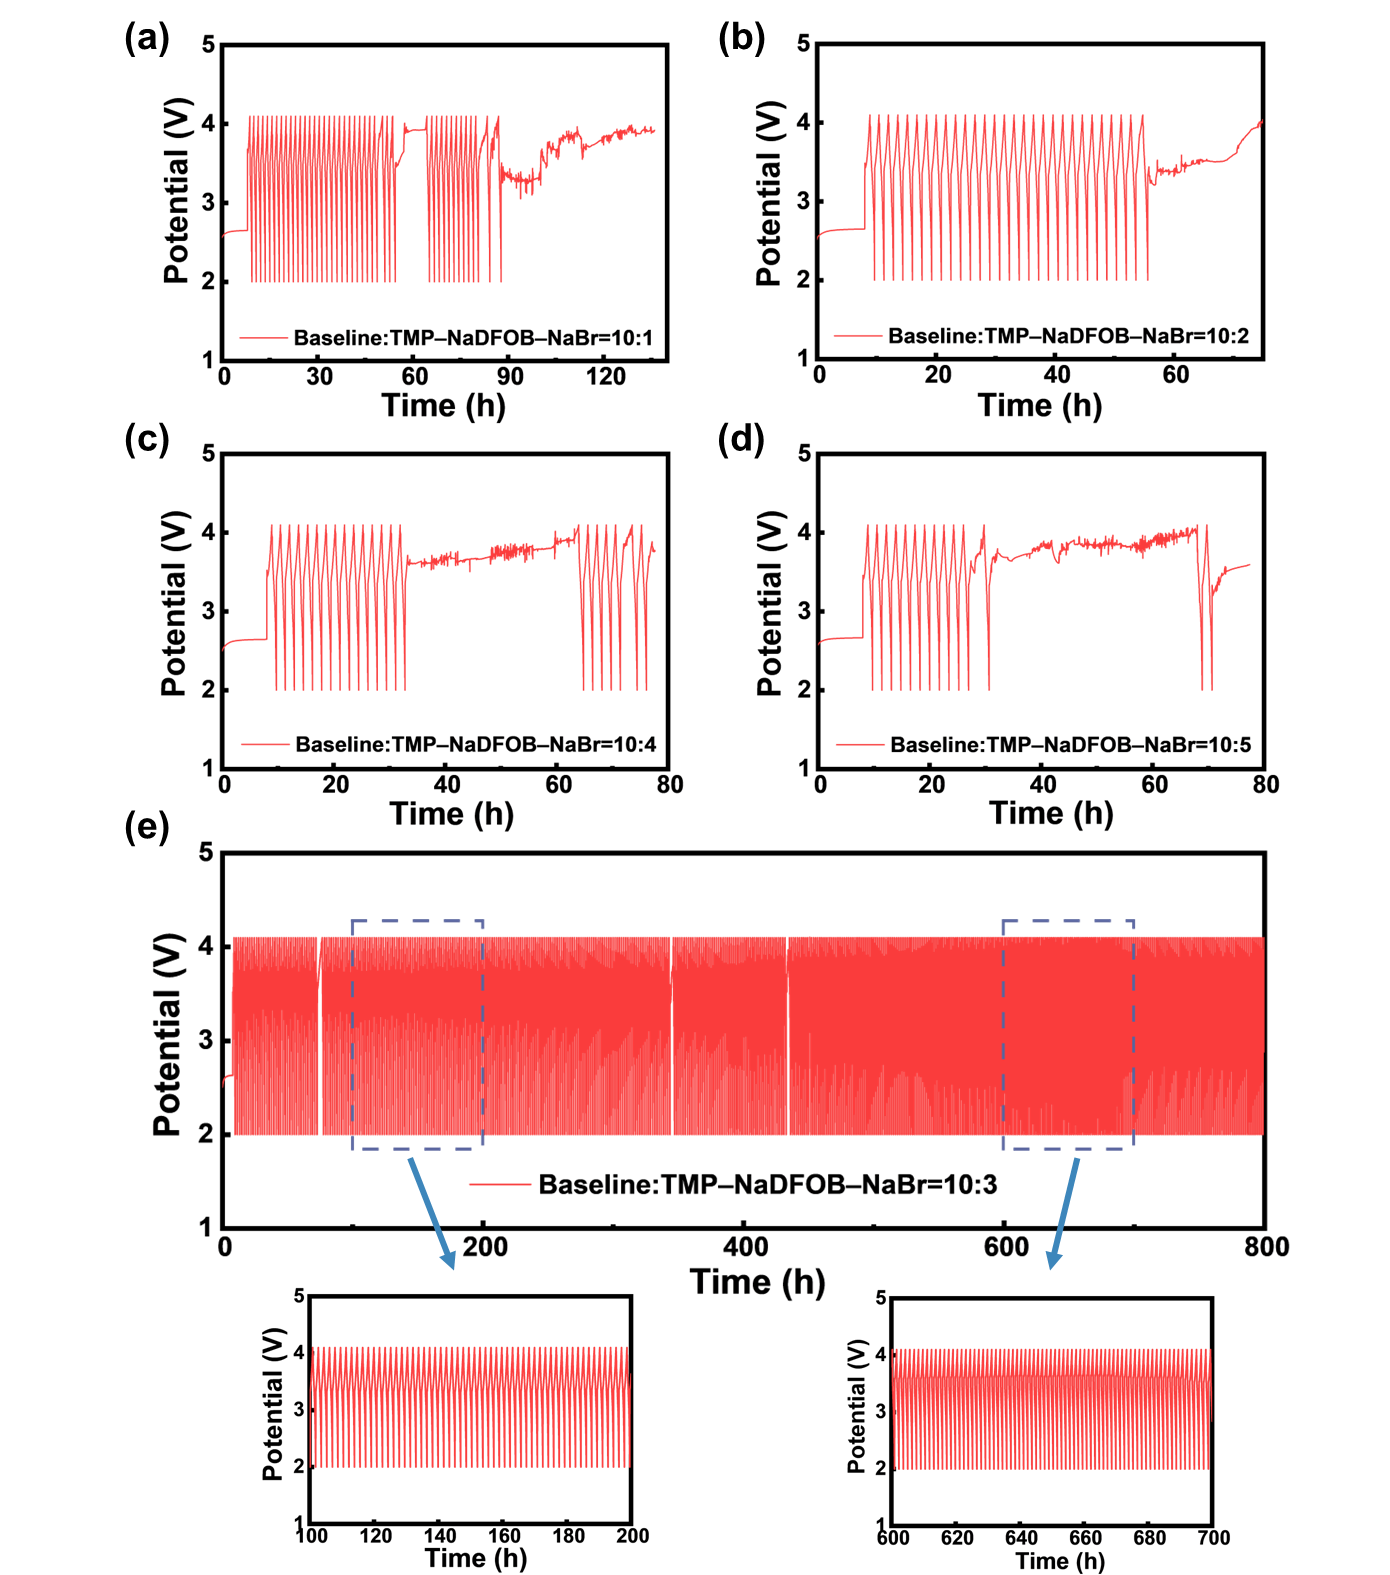


**Supplementary Fig. 1.** Cycling performance of Na||NMLTO cells with different electrolytes volume ratios at 1C.


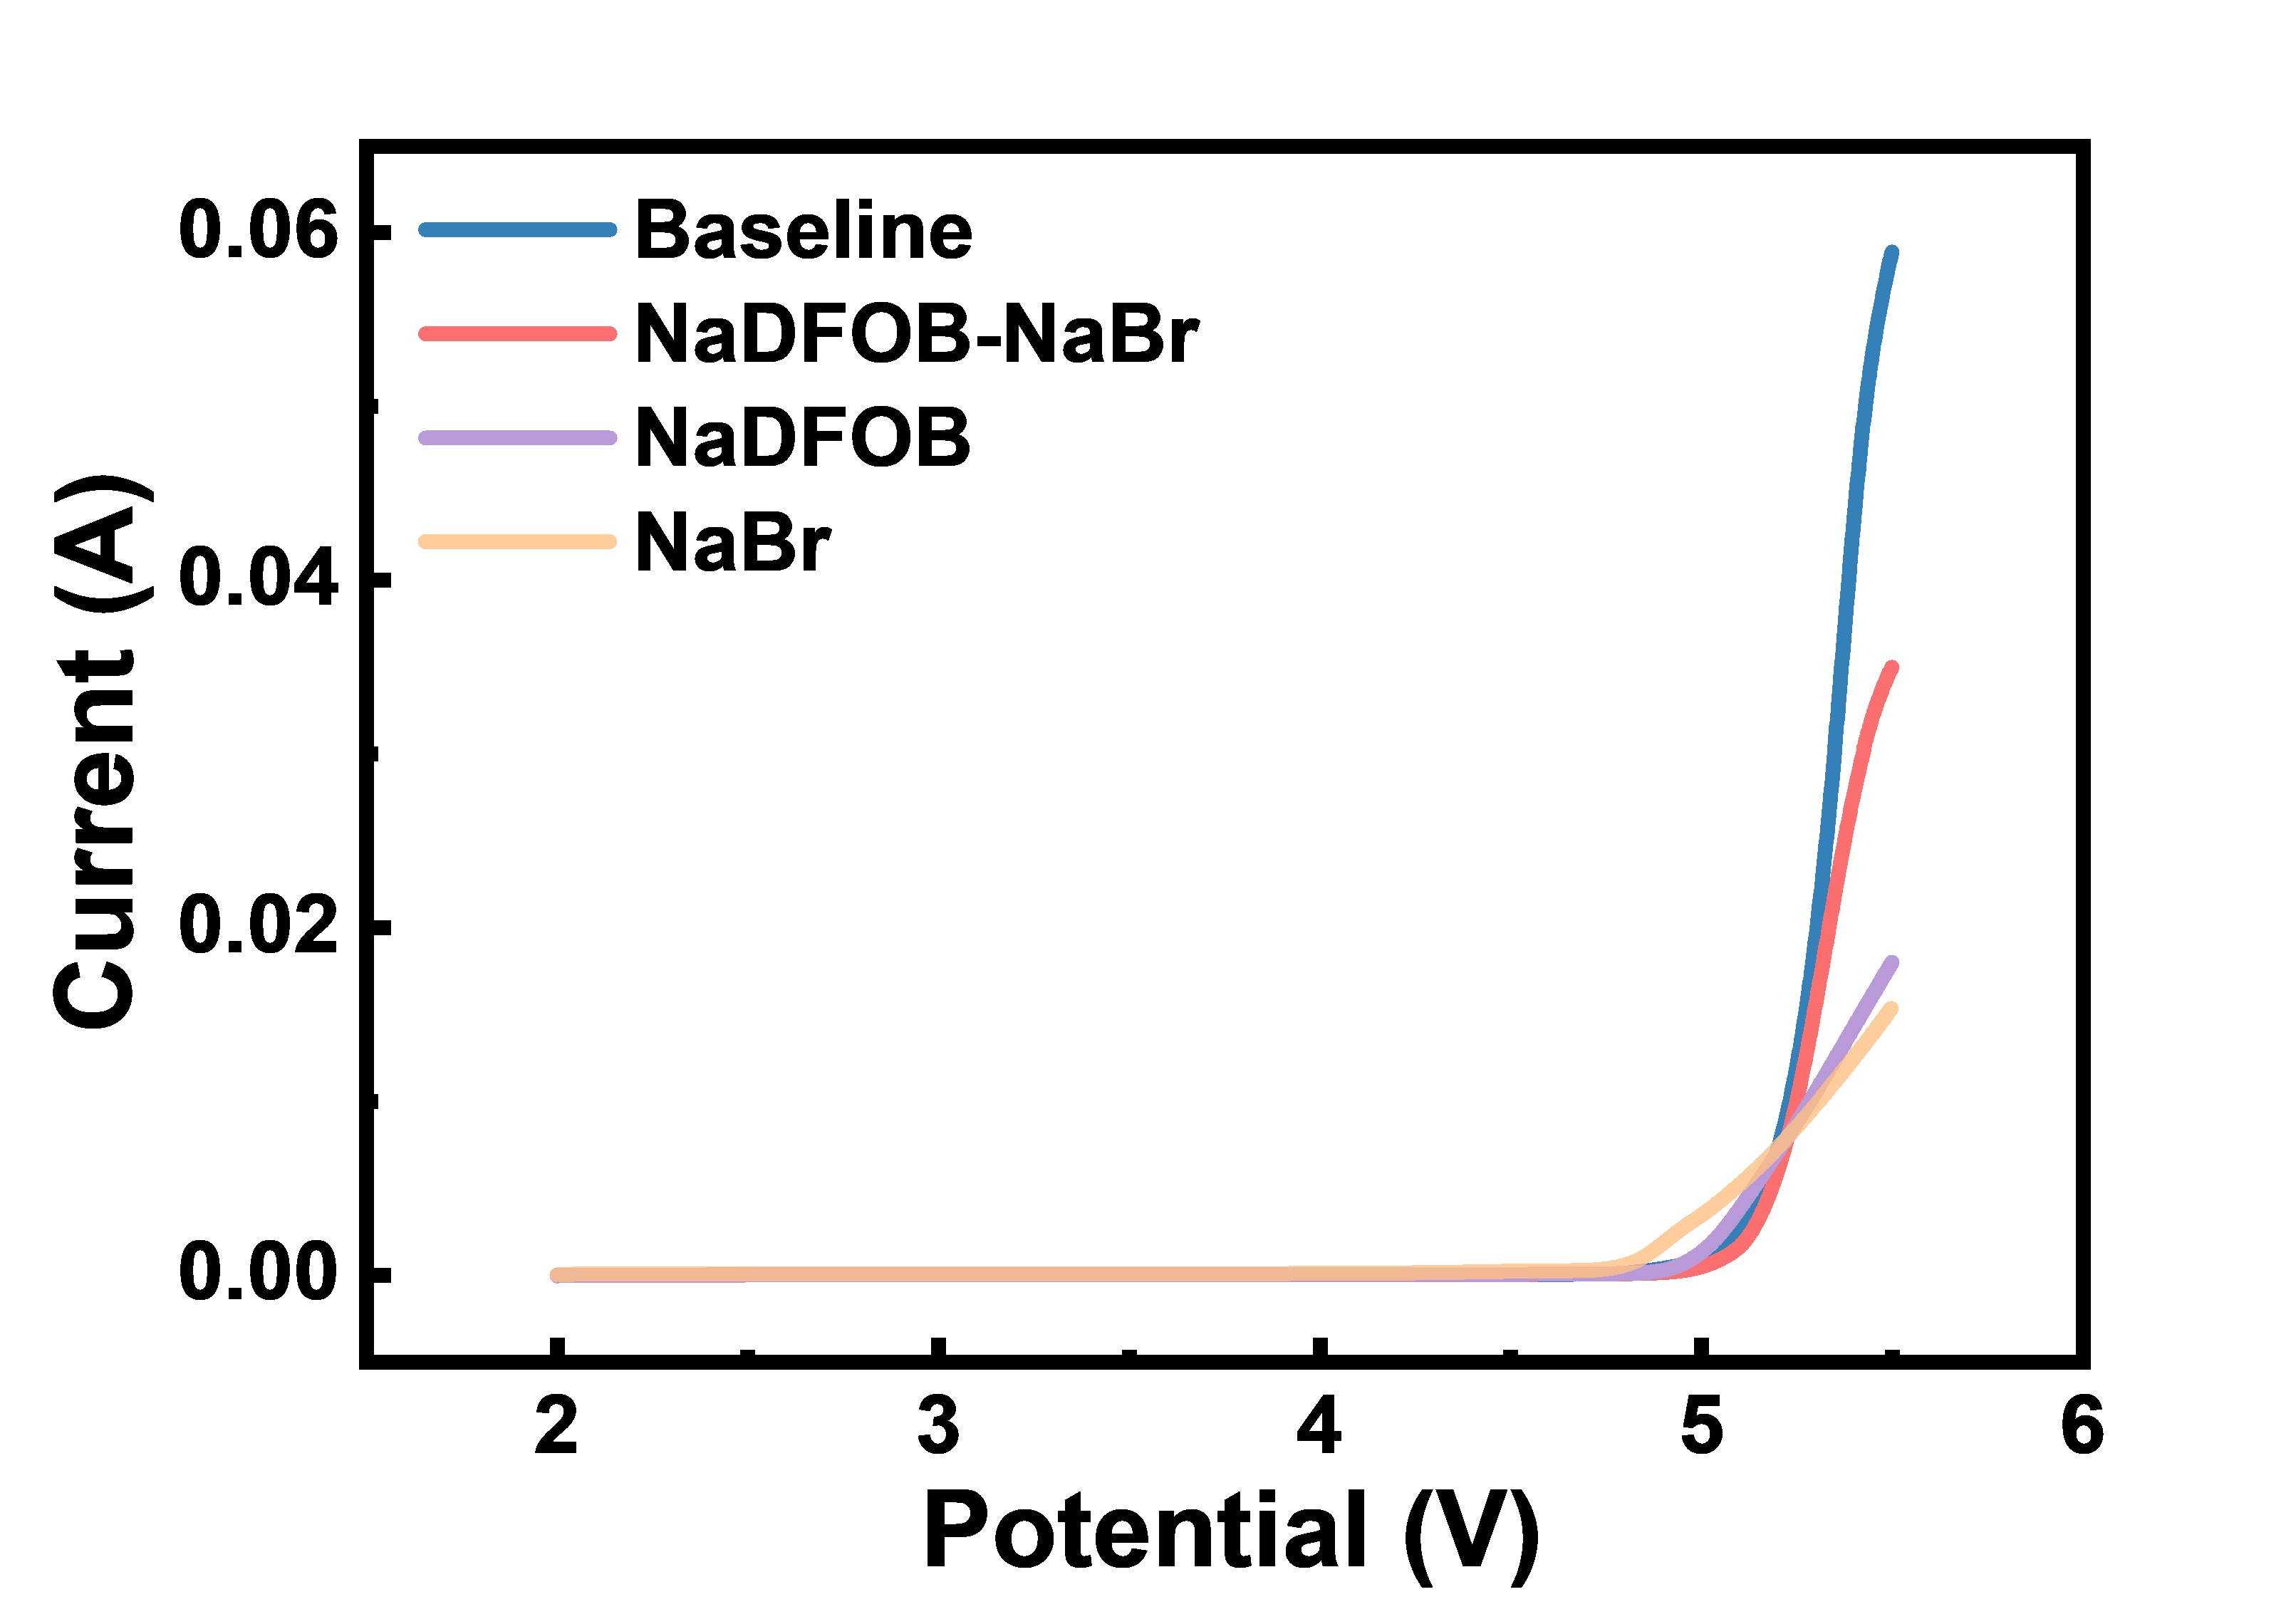


**Supplementary Fig. 2.** LSV curves of Na||SS cells.


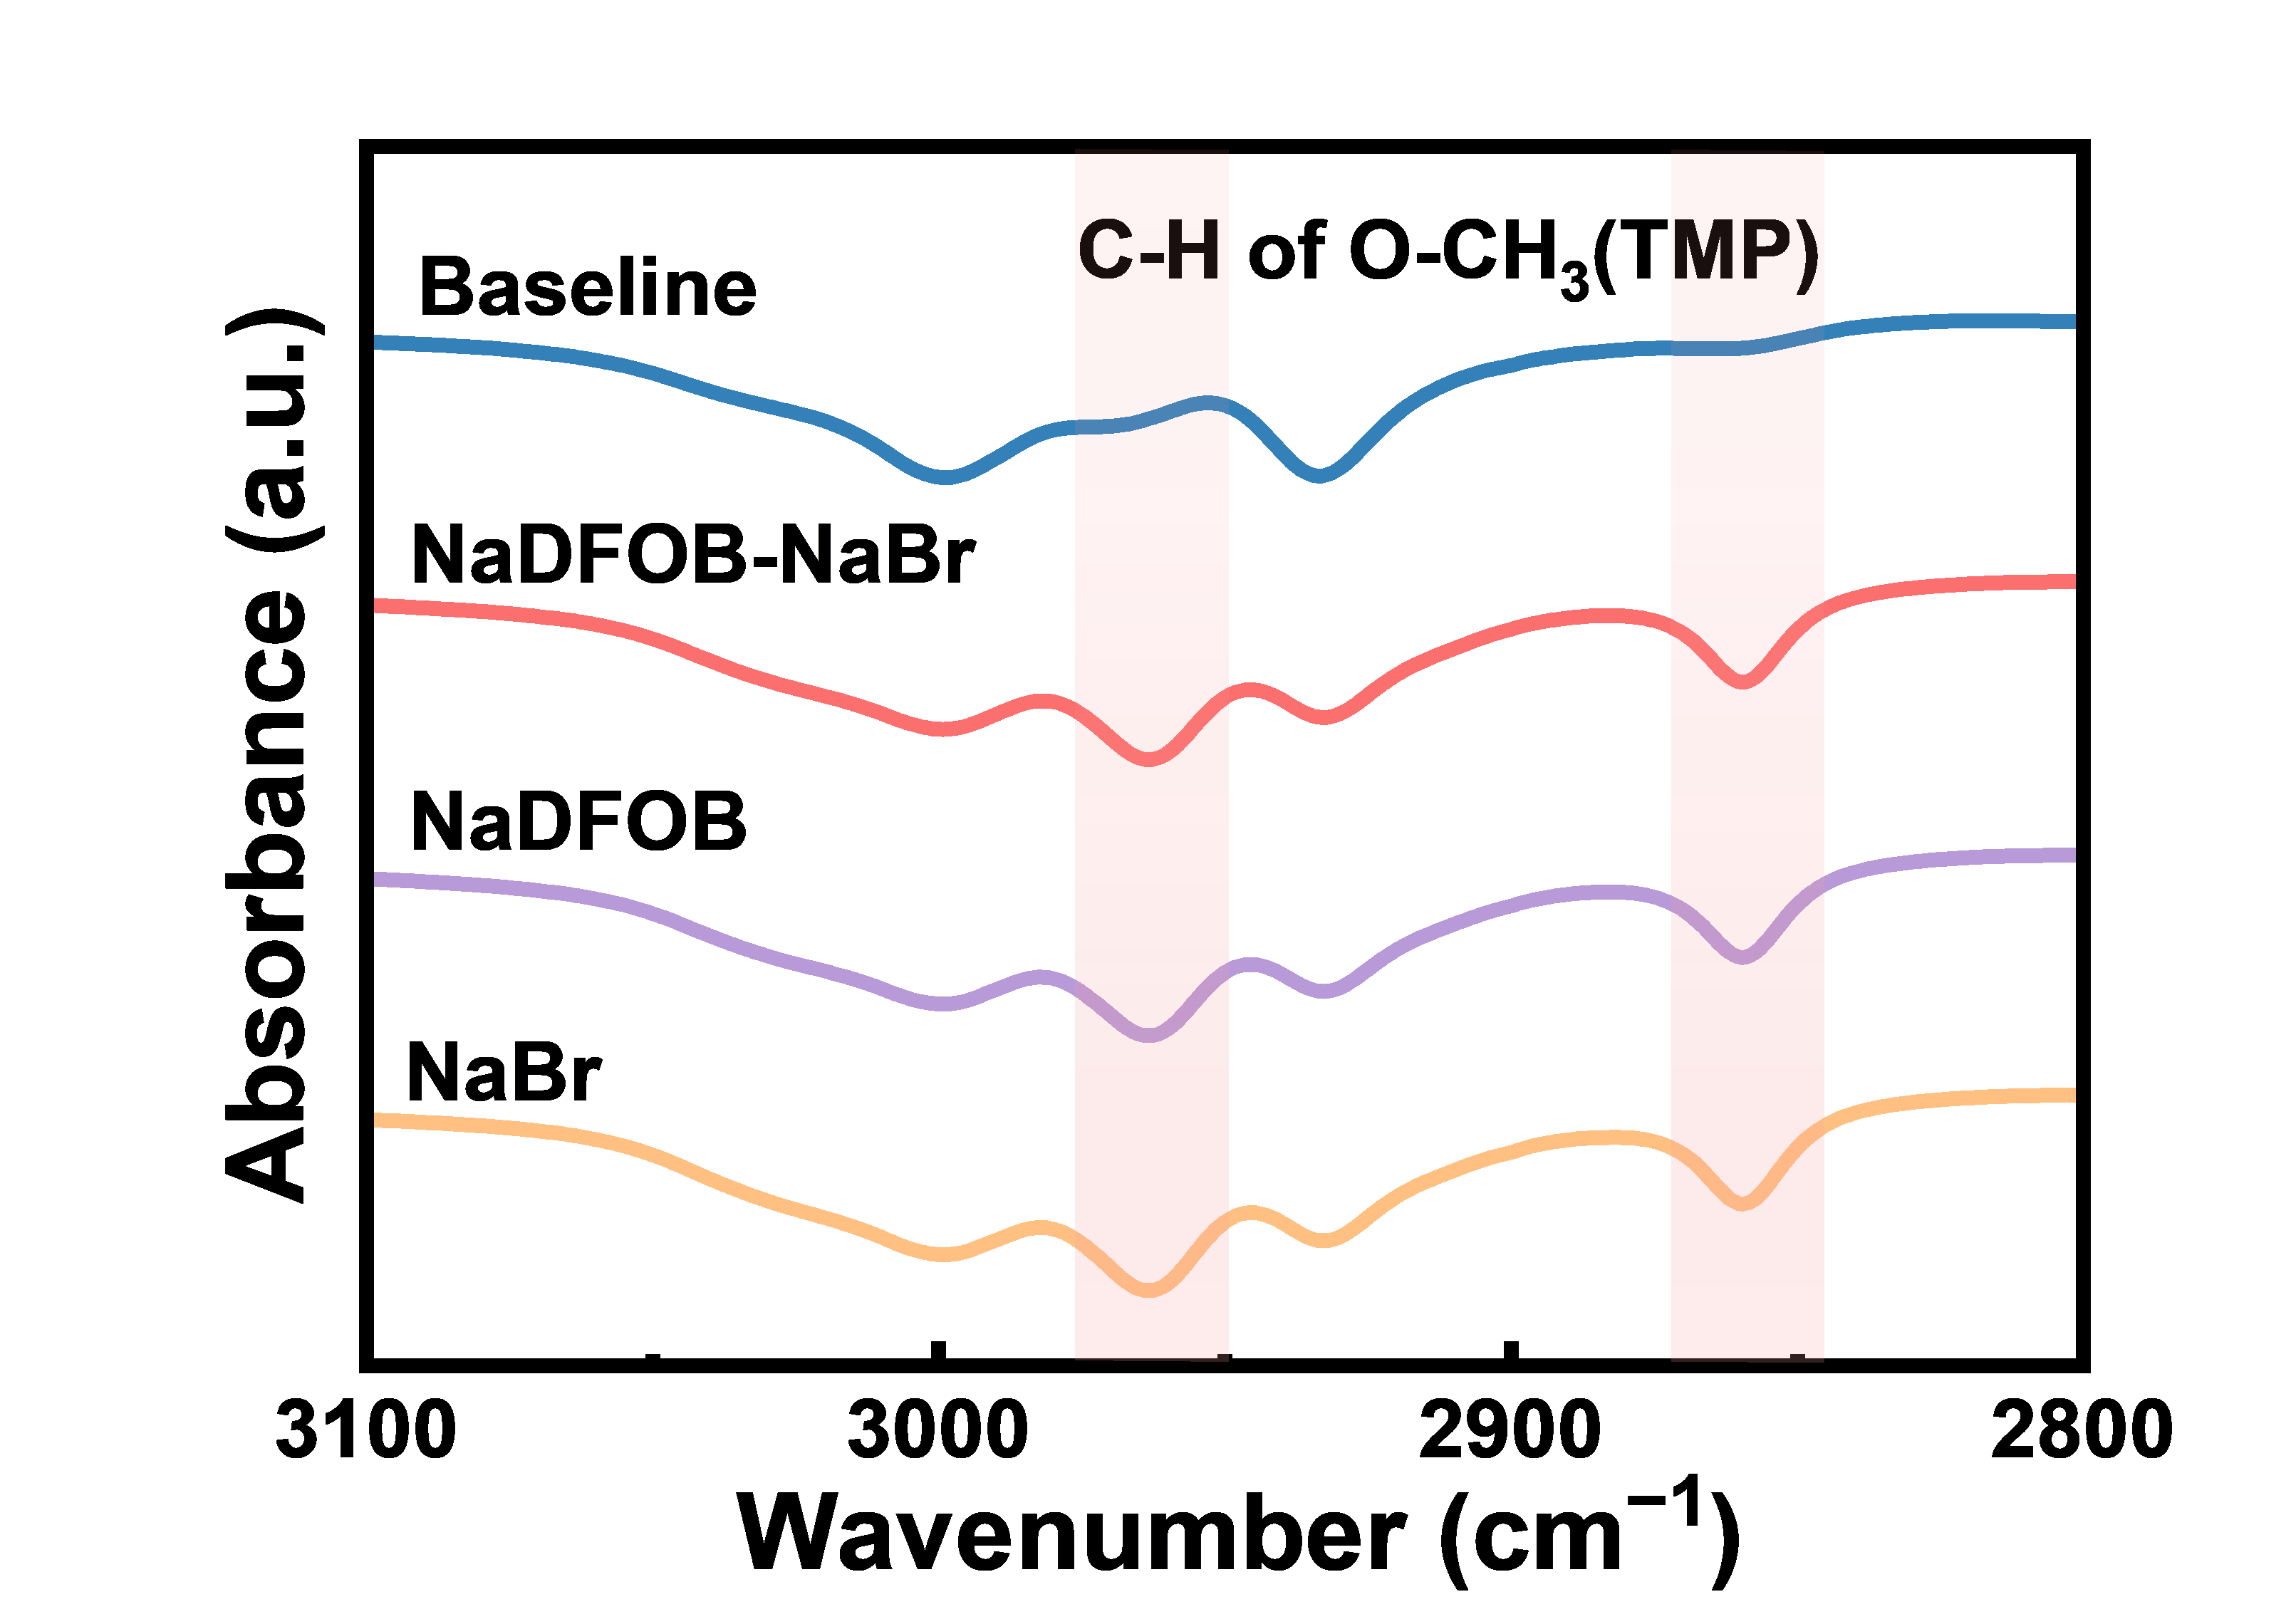


**Supplementary Fig. 3.** FTIR spectra of different electrolytes.


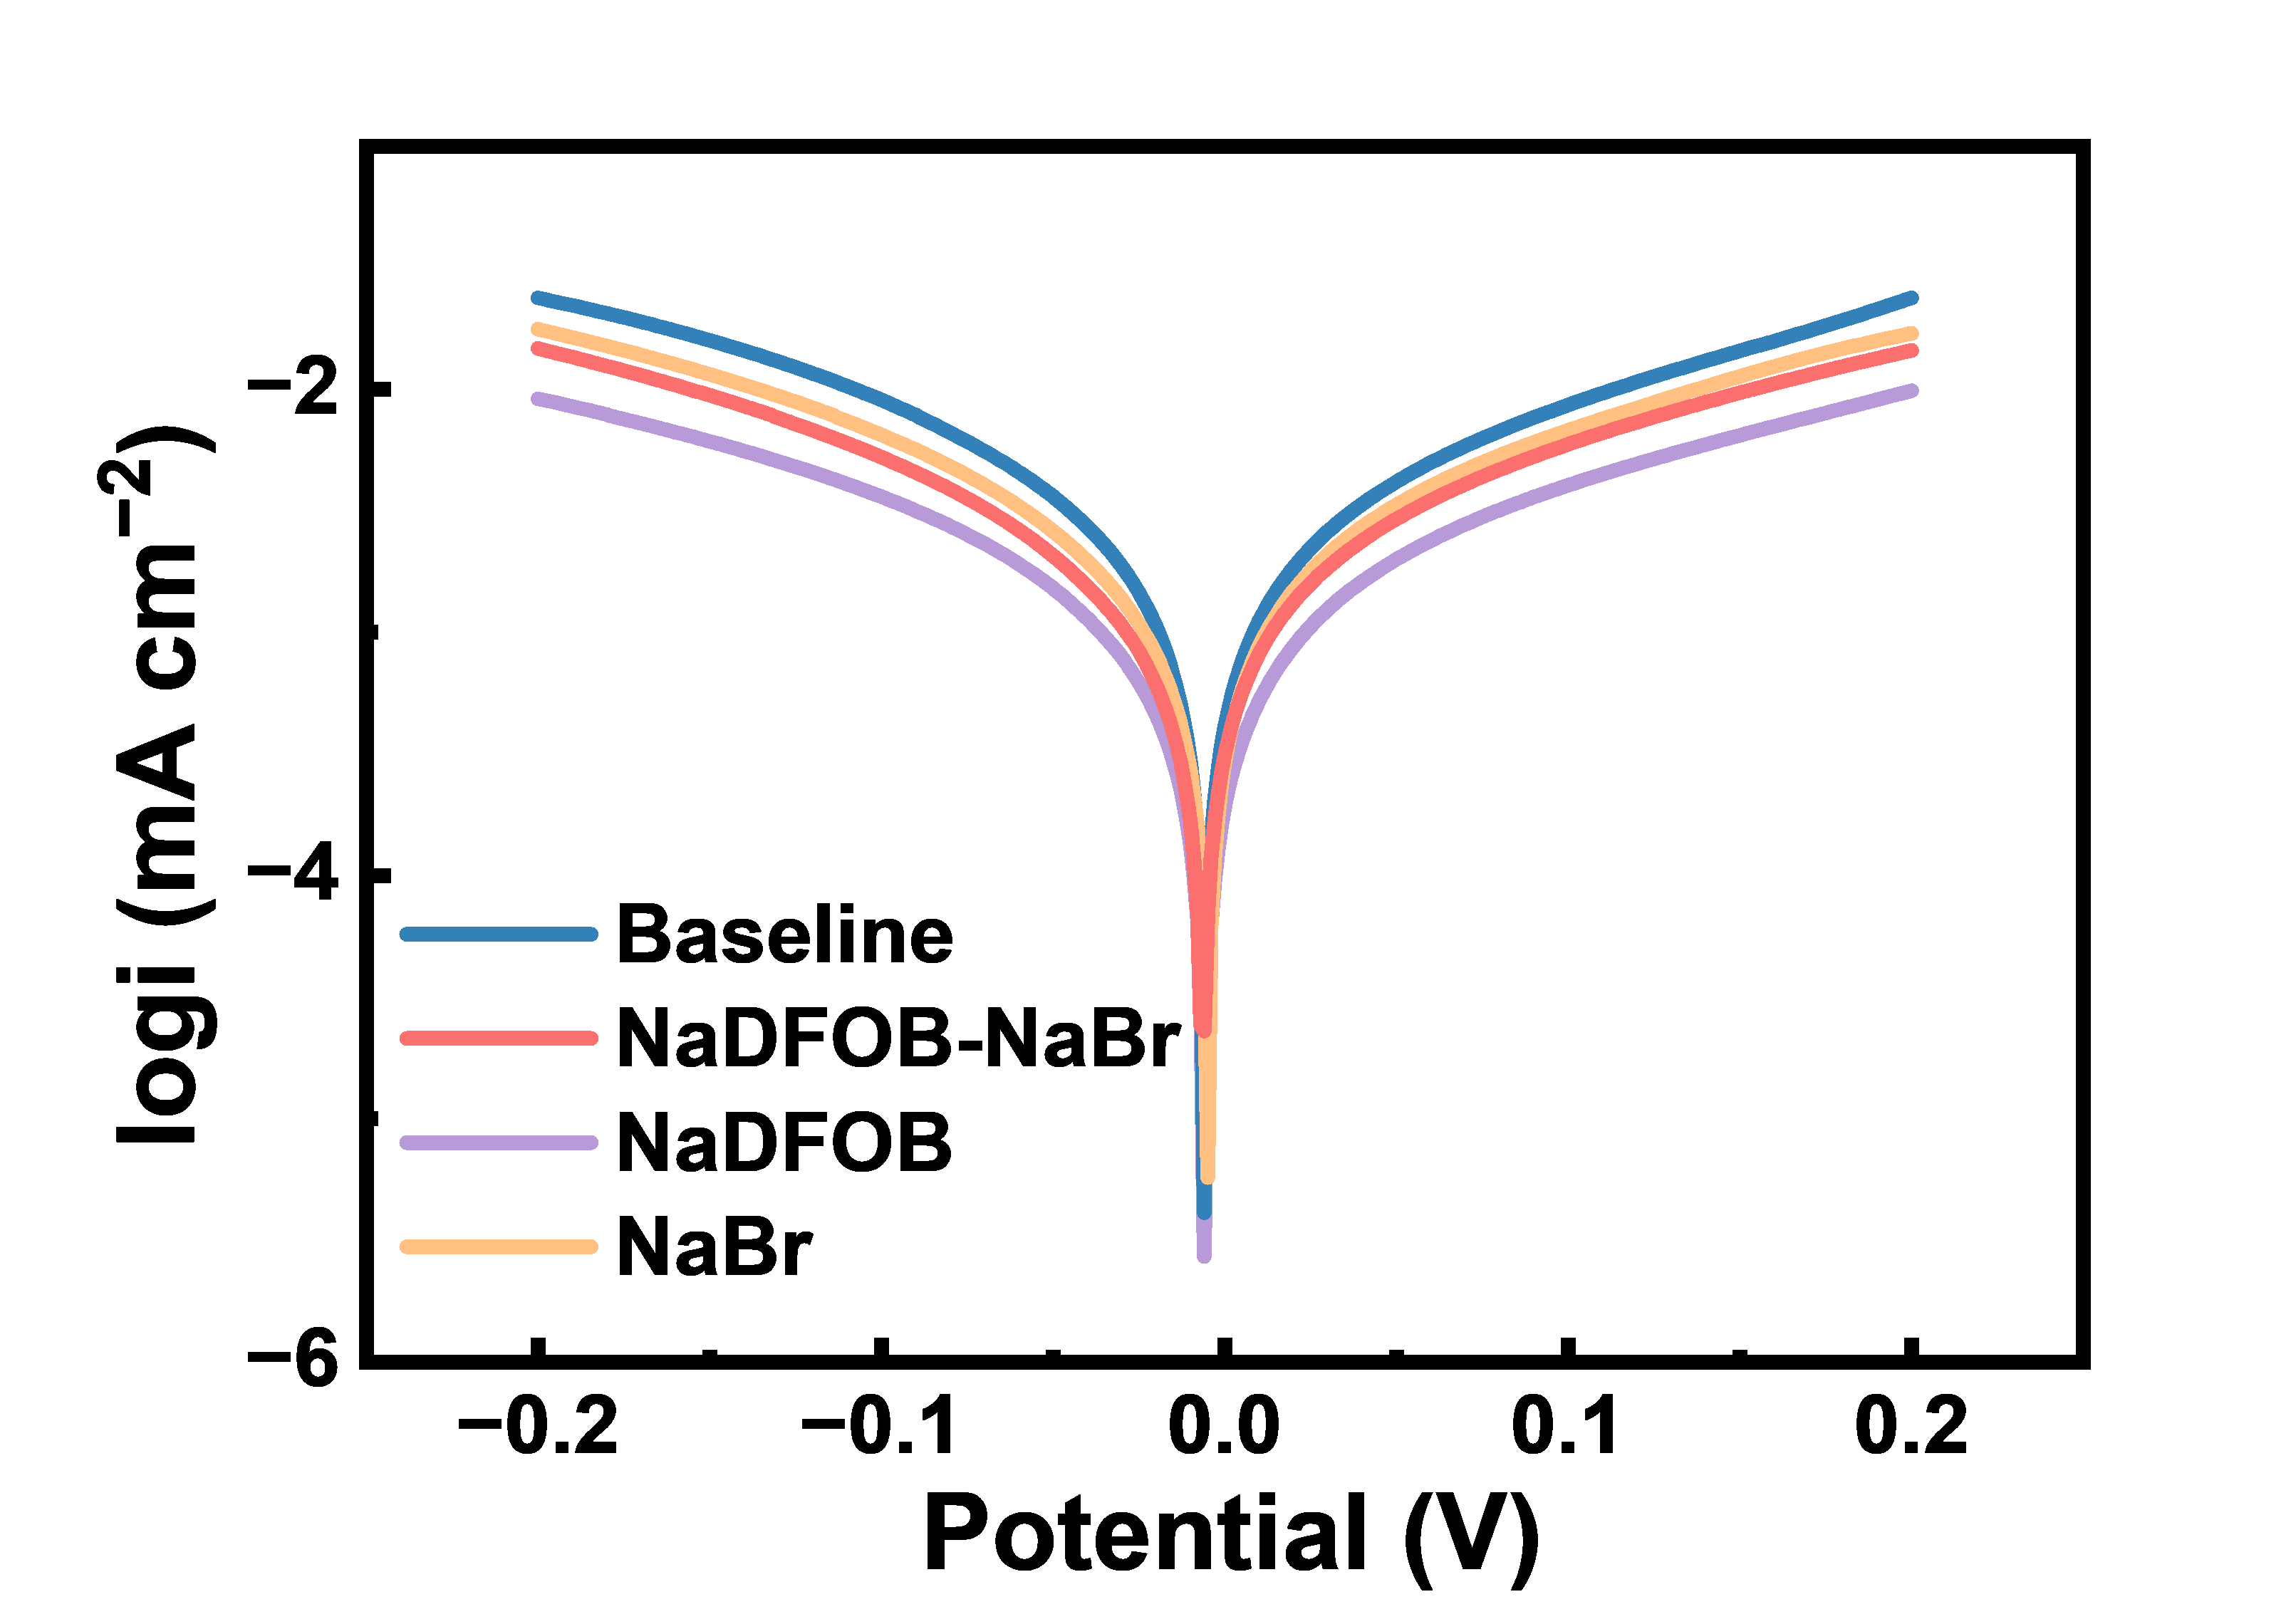


**Supplementary Fig. 4.** Tafel plots of Na||Na cells.


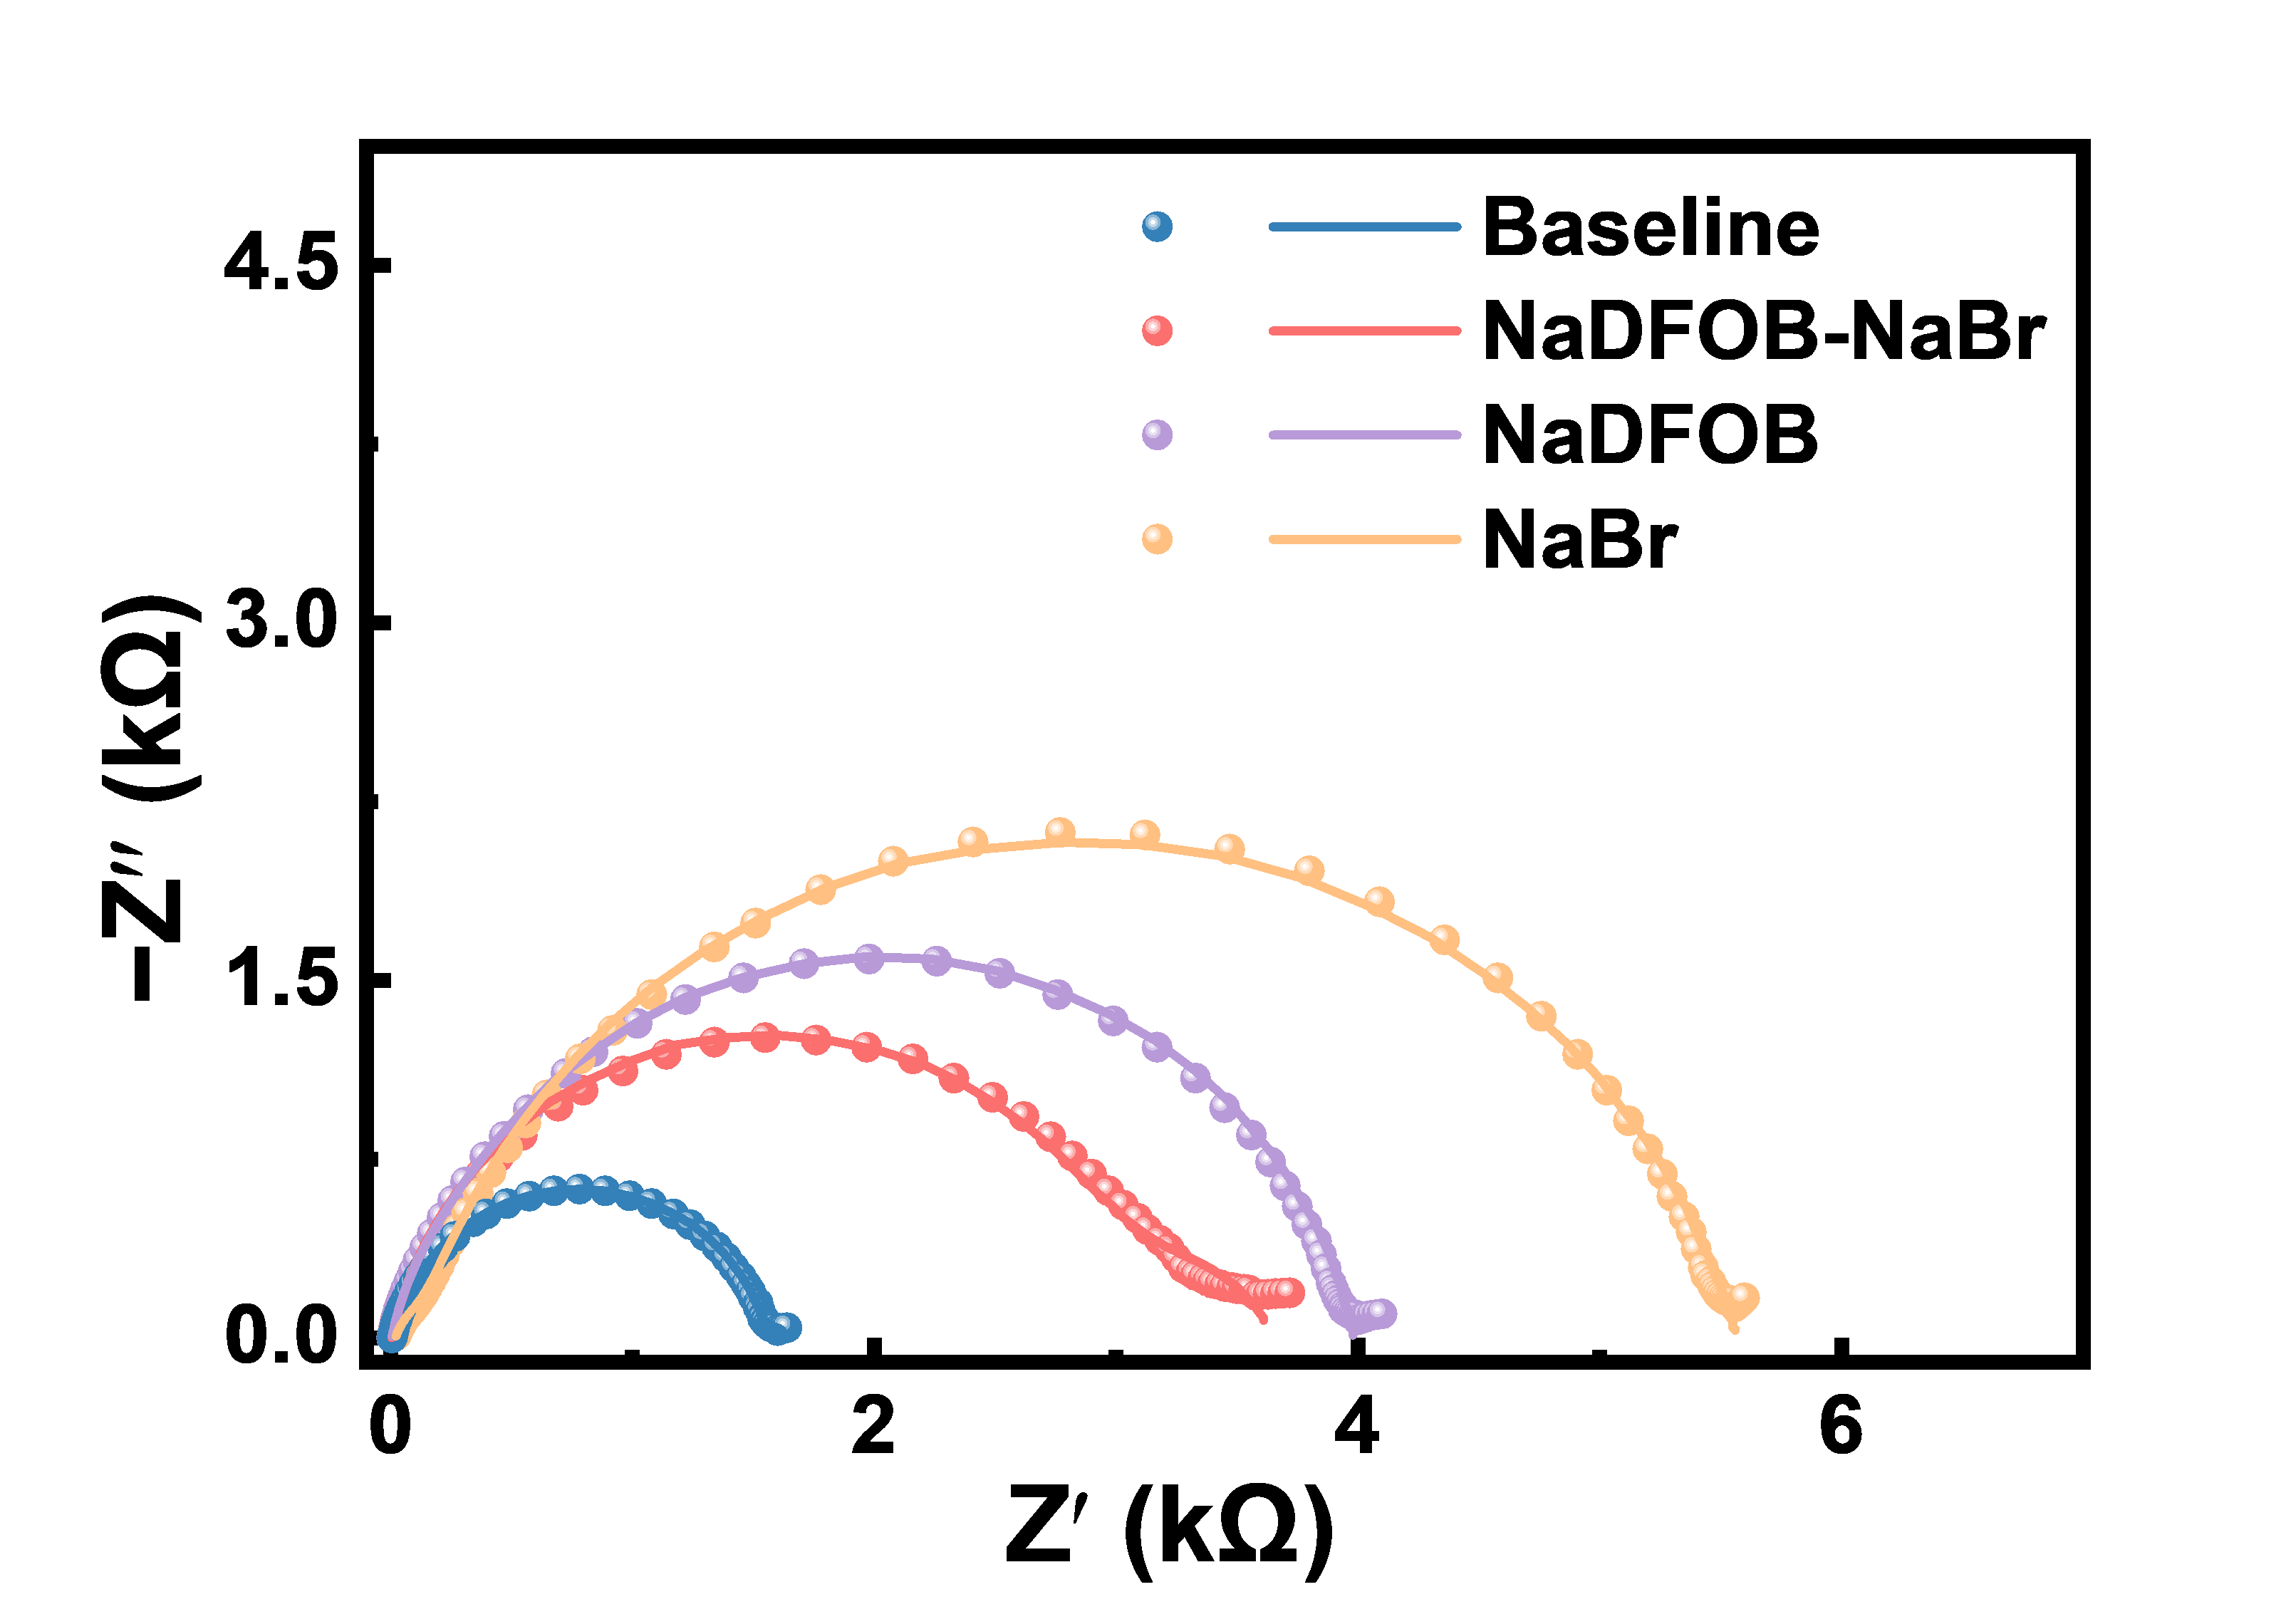


**Supplementary Fig. 5.** Nyquist plots of Na||Na cells.


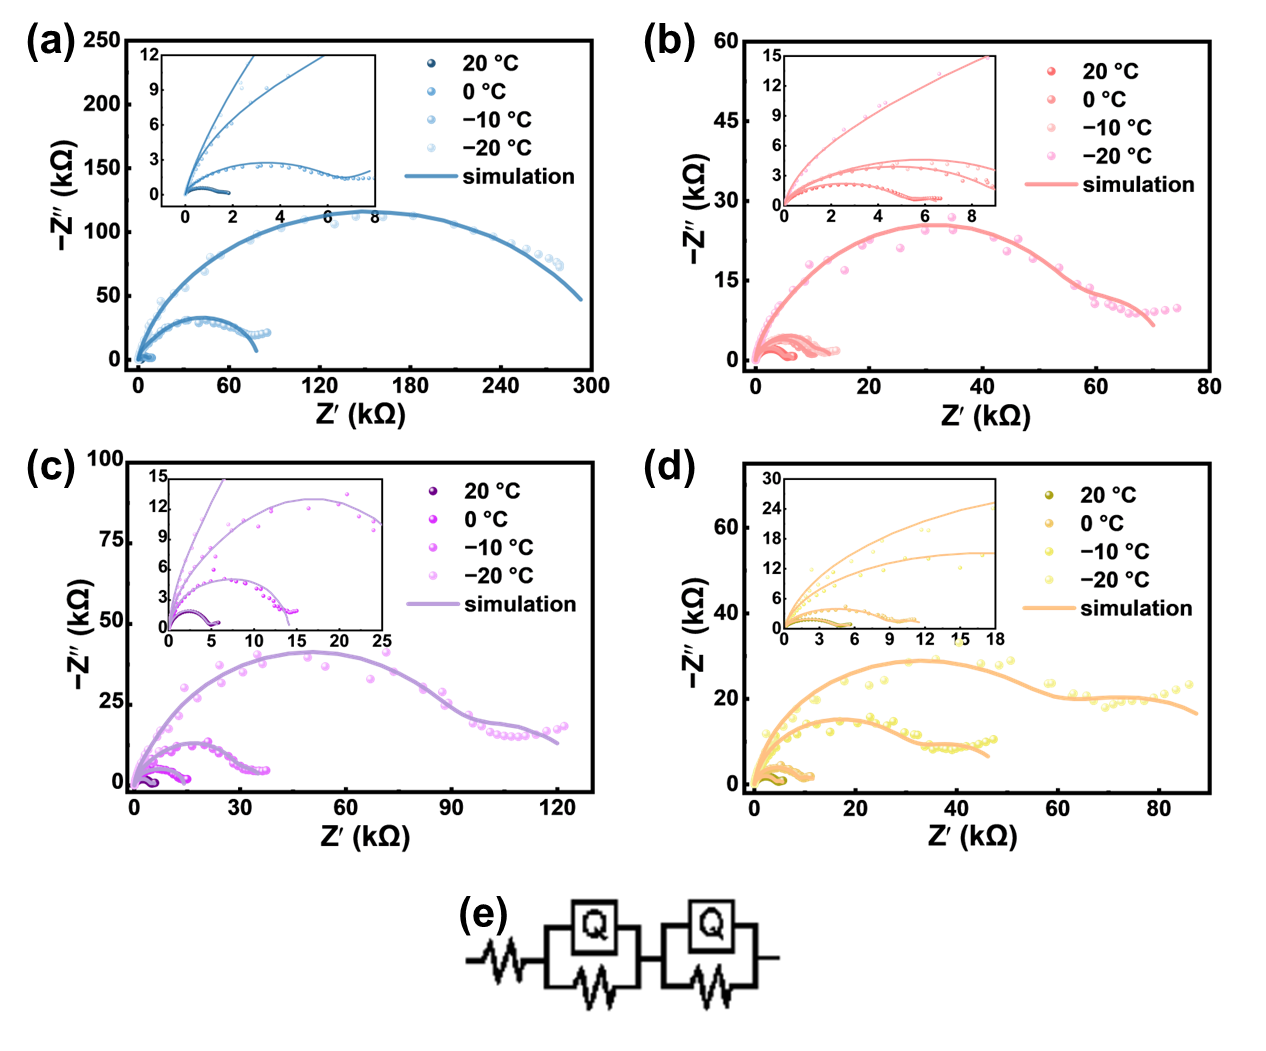


**Supplementary Fig. 6.** Nyquist plots of Na||Na symmetric cells with the (a) Baseline, (b) NaDFOB-NaBr, (c) NaDFOB, and (d) NaBr electrolytes measured at various temperatures. (e) Equivalent circuit model used for fitting the EIS spectra.


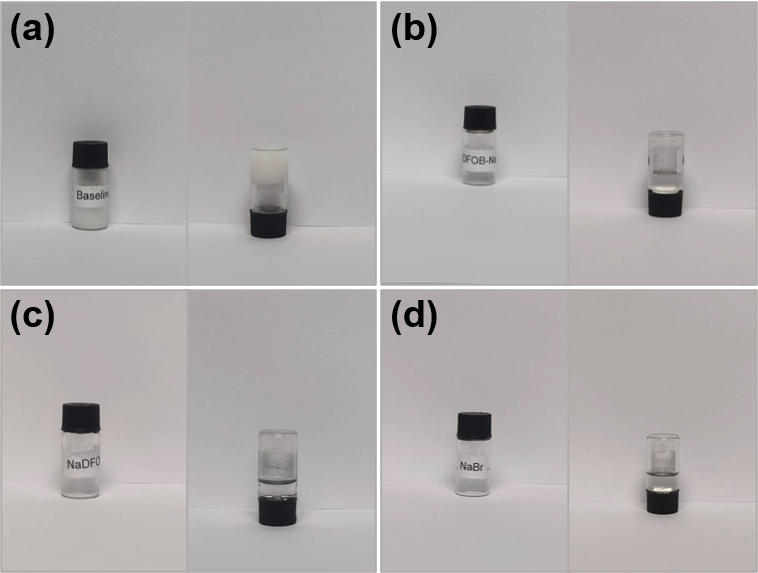


**Supplementary Fig. 7.** Photographs of different electrolytes at −40 °C: (a) Baseline, (b) NaDFOB-NaBr, (c) NaDFOB, and (d) NaBr.


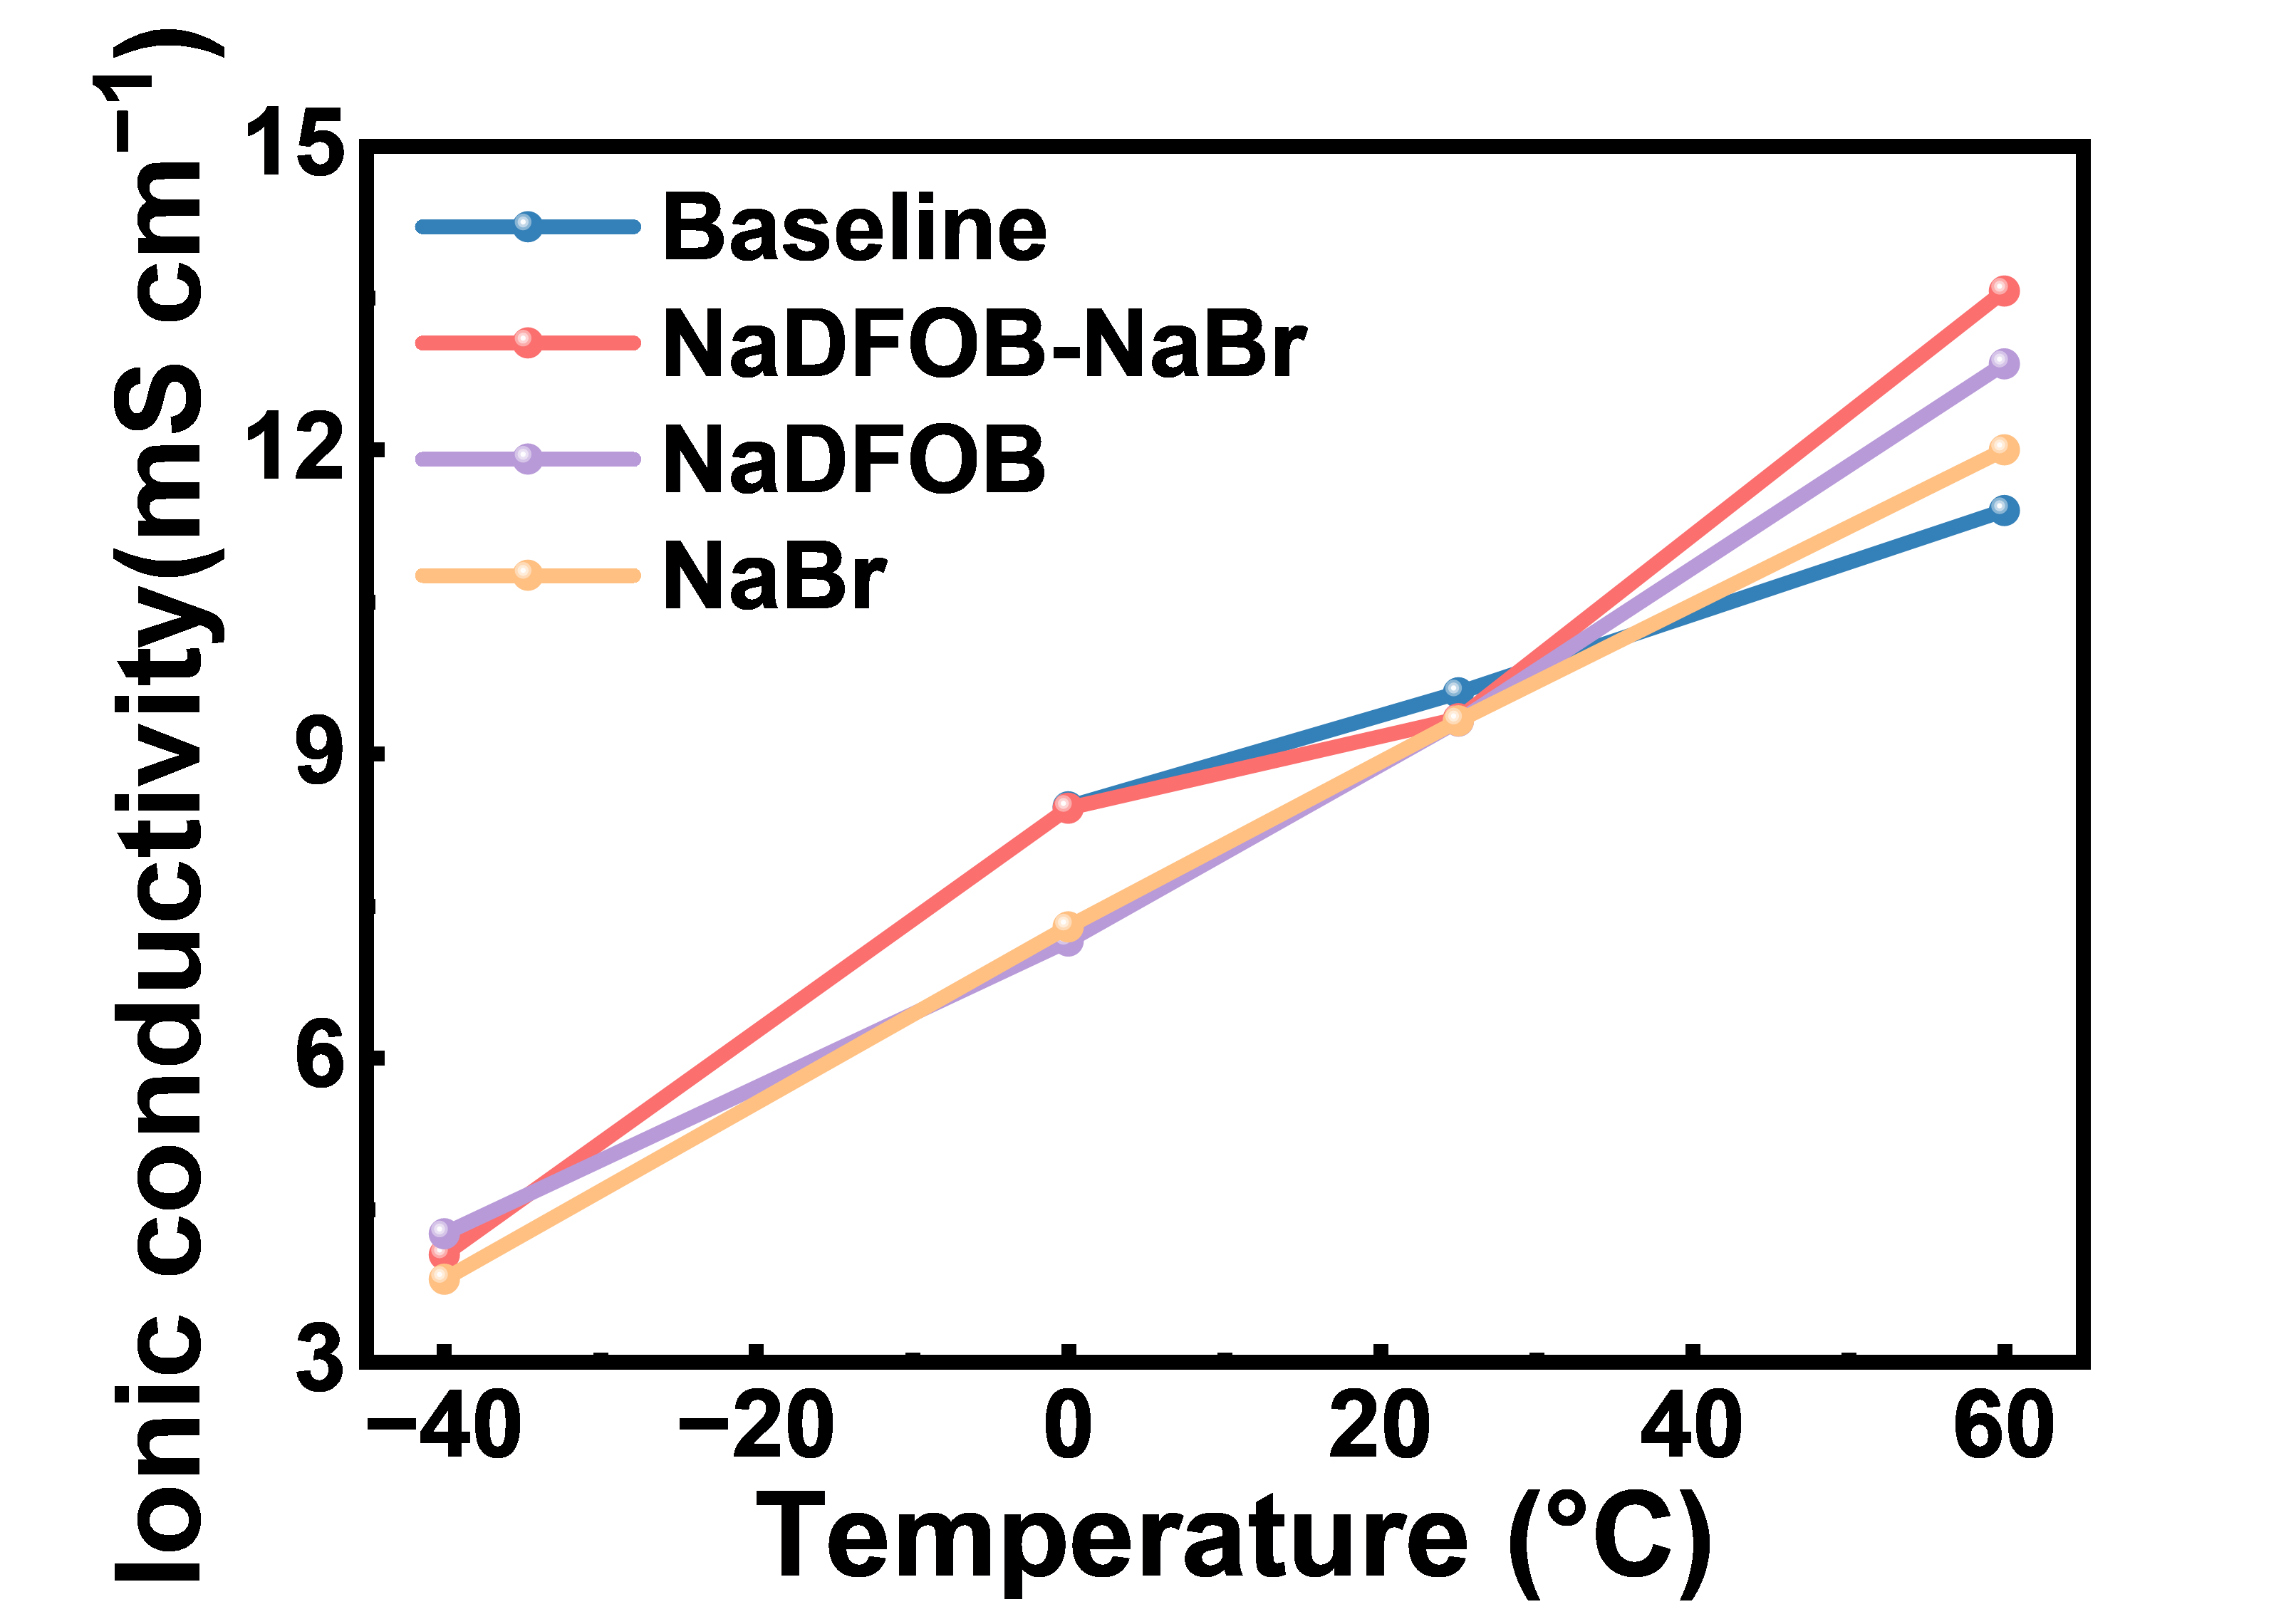


**Supplementary Fig. 8.** Temperature-dependent ionic conductivities of the electrolytes.


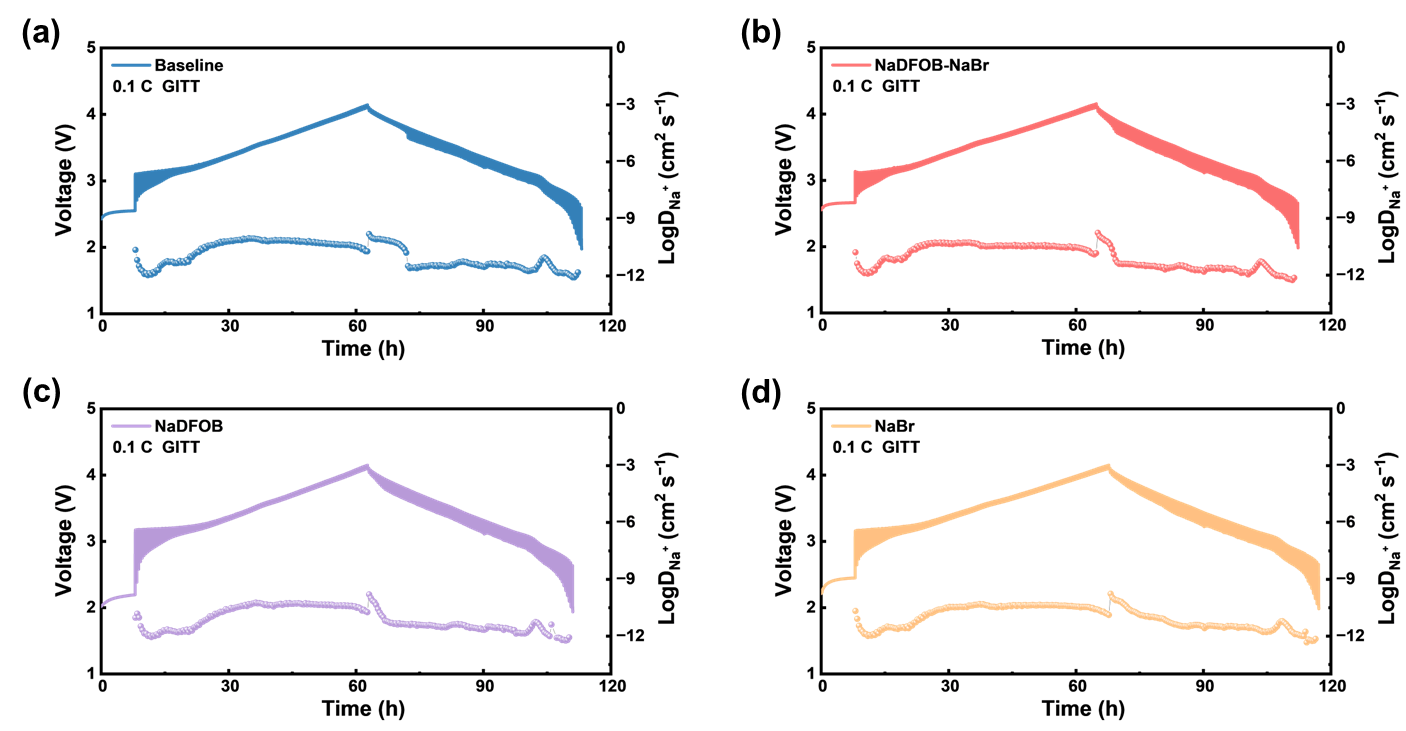


**Supplementary Fig. 9.** Na+ diffusion coefficients (DNa+) in the cathode calculated from GITT plots during charge and discharge: (a) Baseline, (b) NaDFOB-NaBr, (c) NaDFOB, and (d) NaBr.


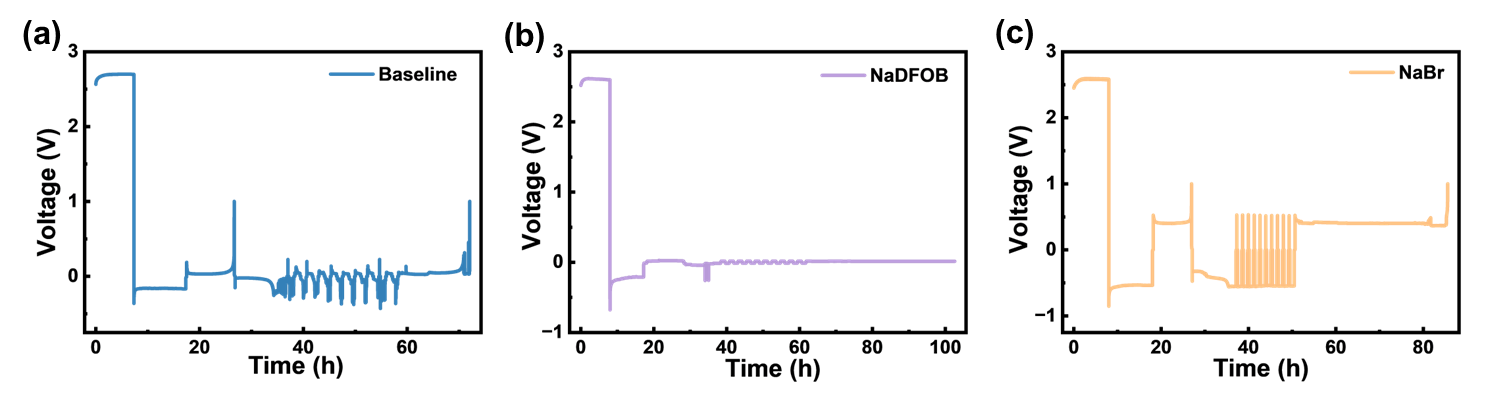


**Supplementary Fig. 10.** CE of Na plating/stripping measured in Na||Cu cells via the Aurbach method for (a) Baseline, (b) NaDFOB, and (c) NaBr.


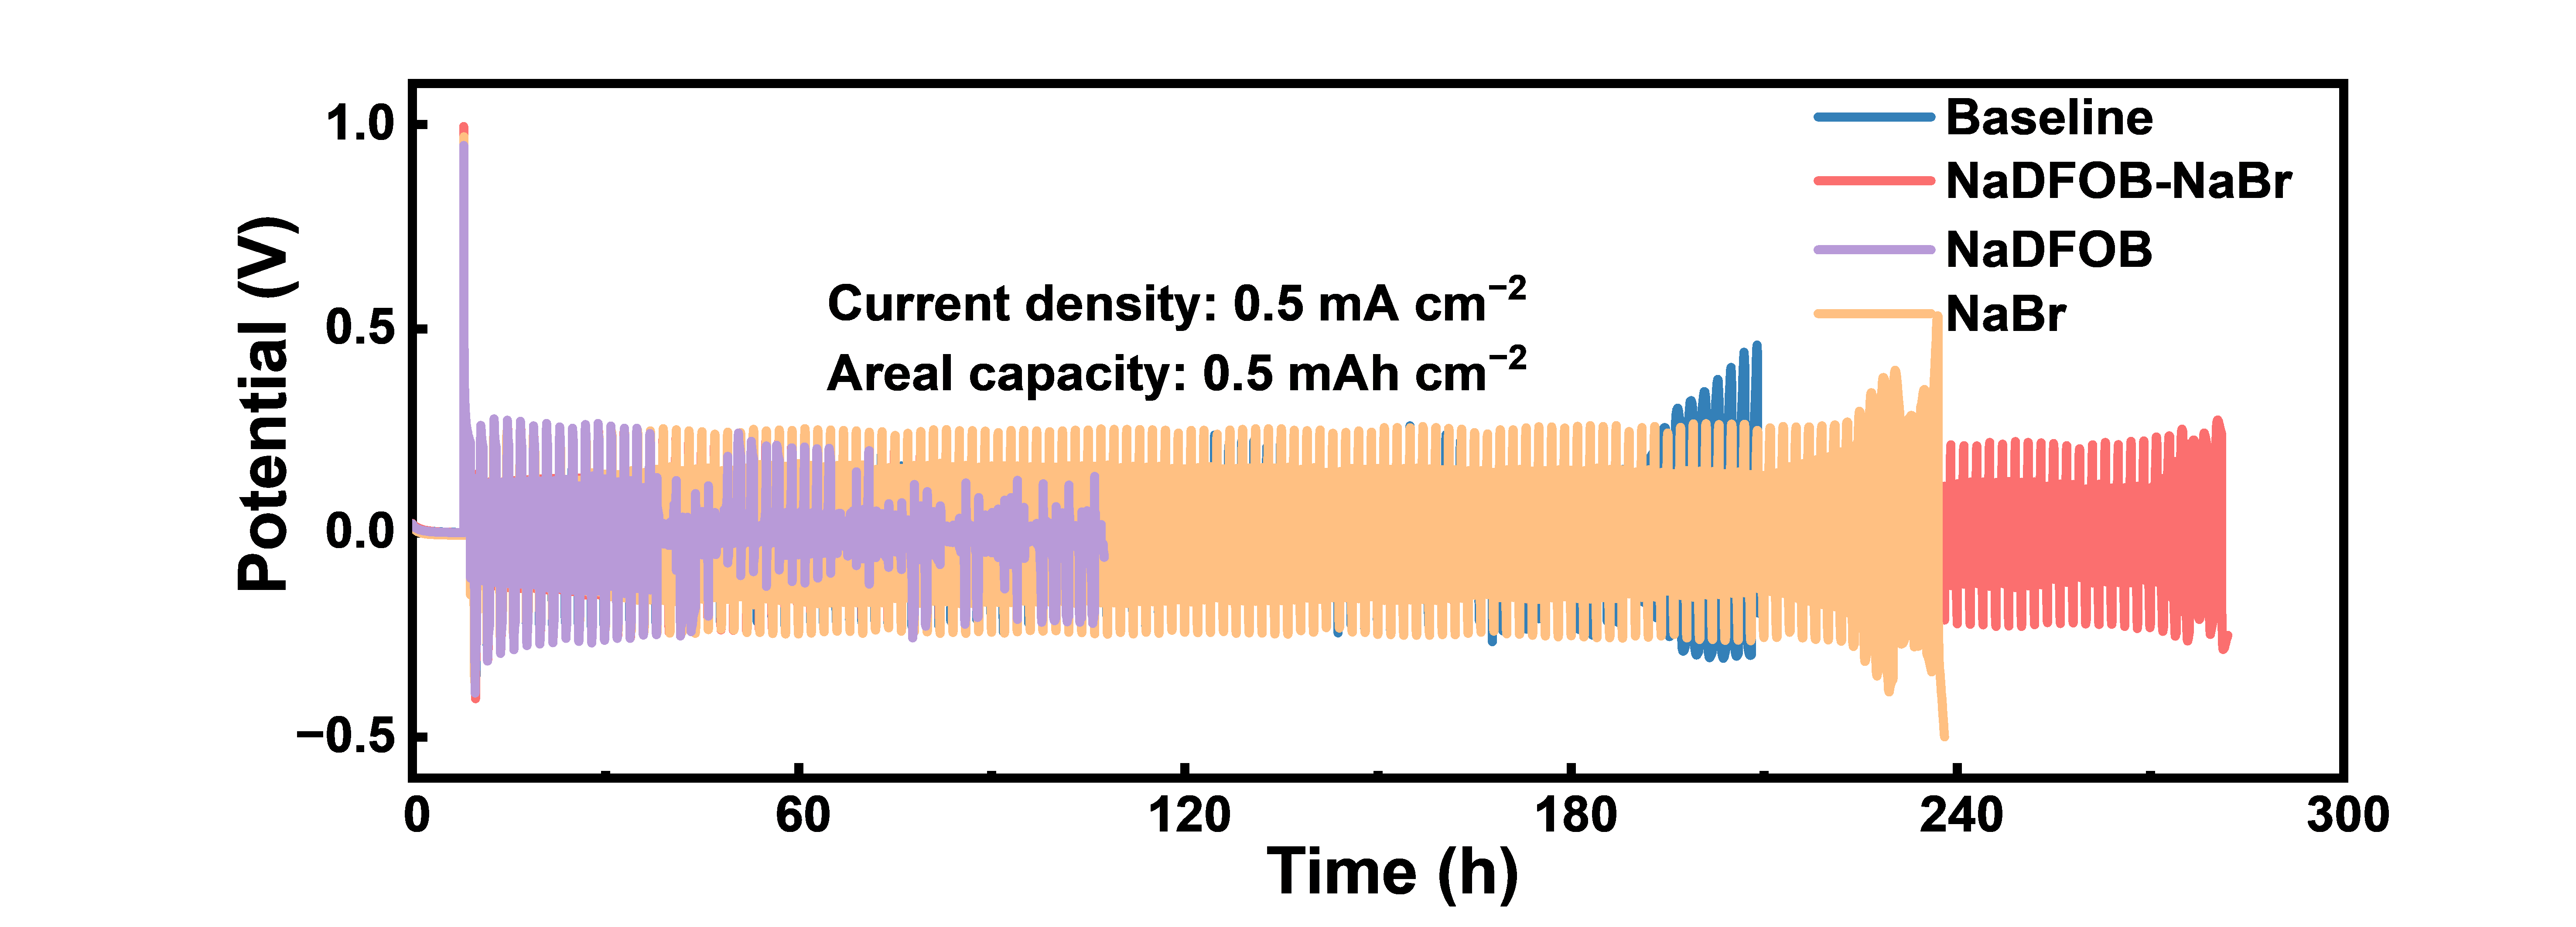


**Supplementary Fig. 11.** Voltage curves of Na||Na symmetric cells cycled at 0.5 mA cm−2 and 0.5 mAh cm−2.


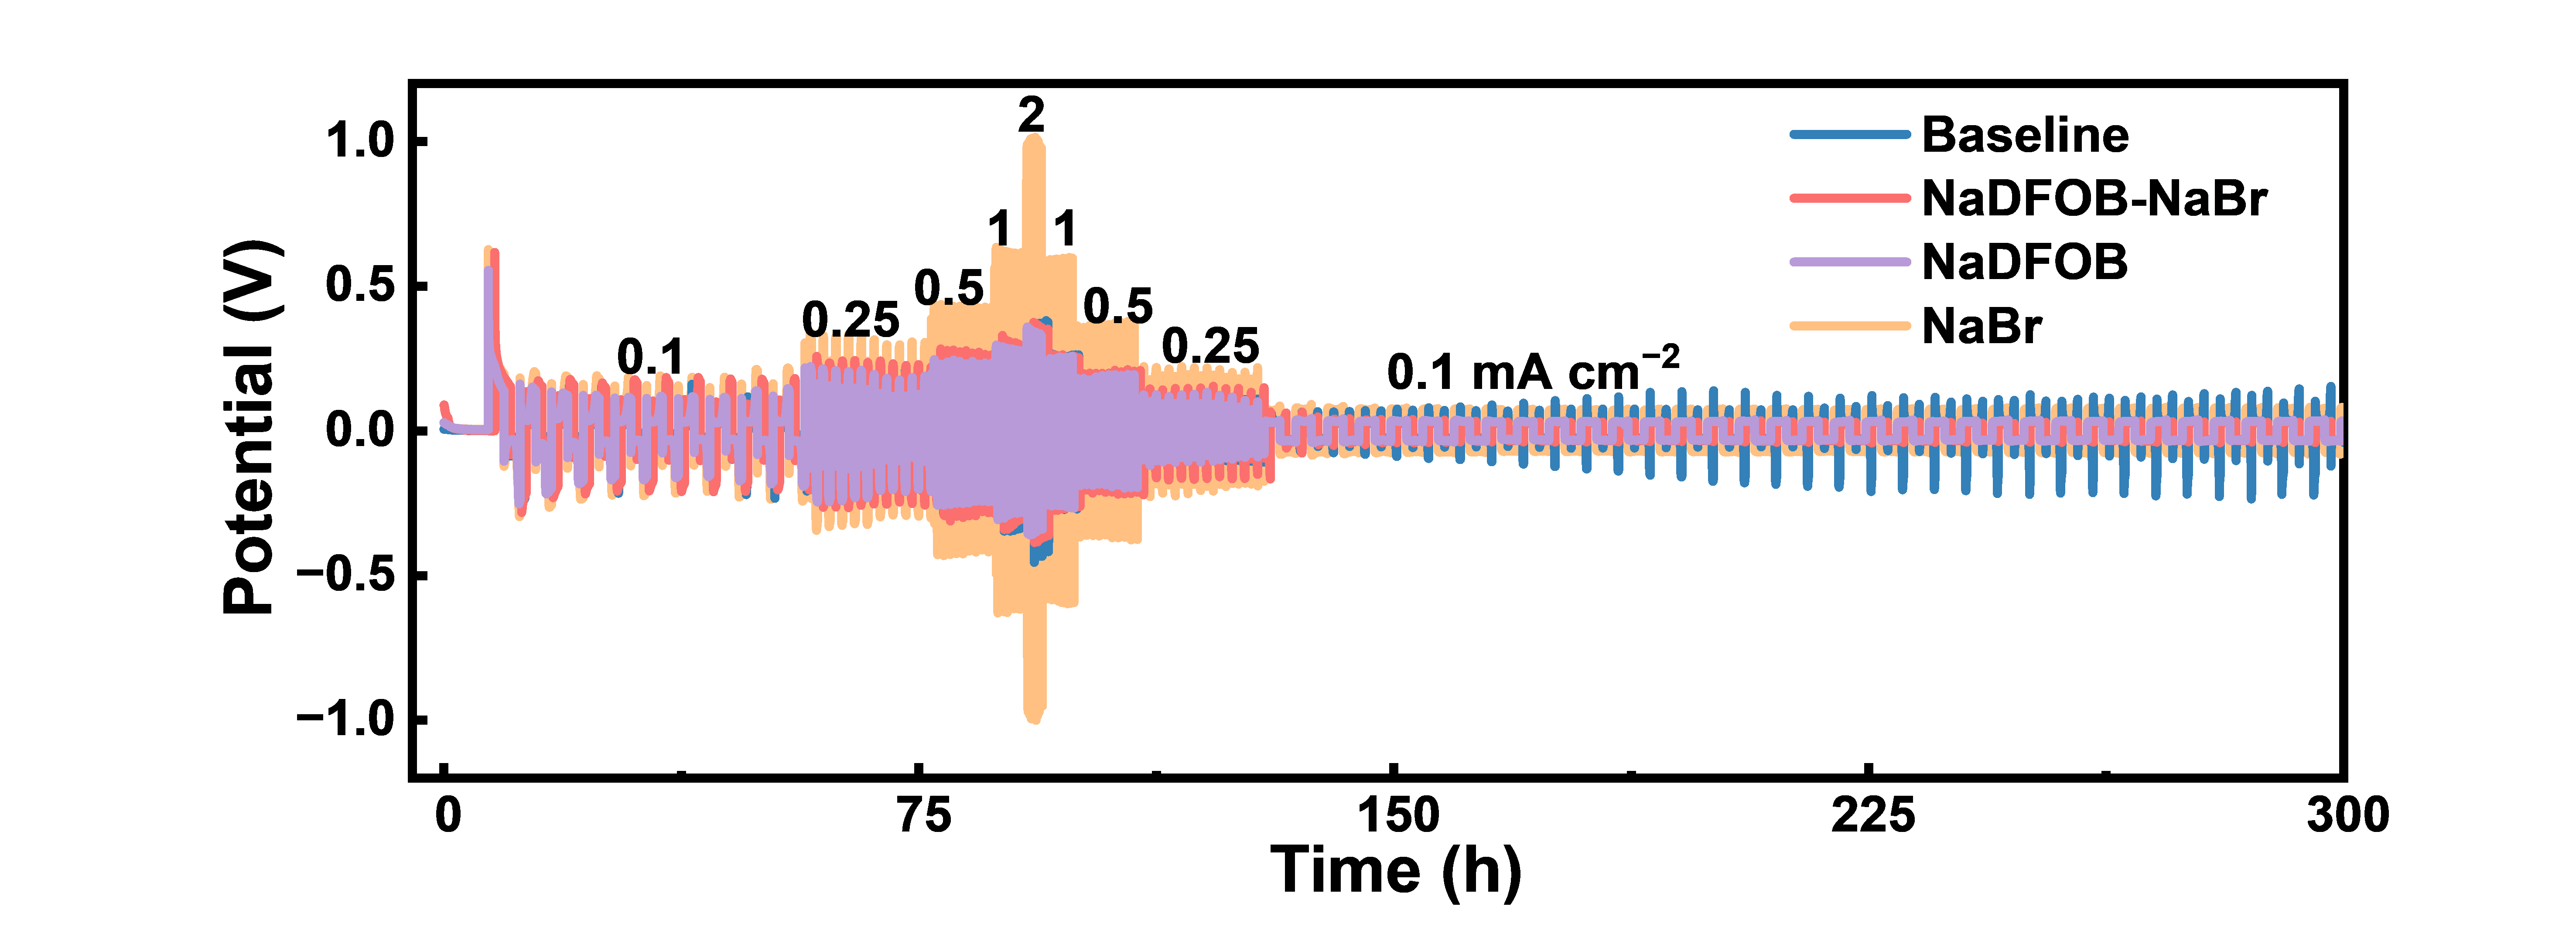


**Supplementary Fig. 12.** Rate capabilities of Na||Na symmetric cells with varying current densities from 0.1 to 2 mA cm−2 and back to 0.1 mA cm−2.


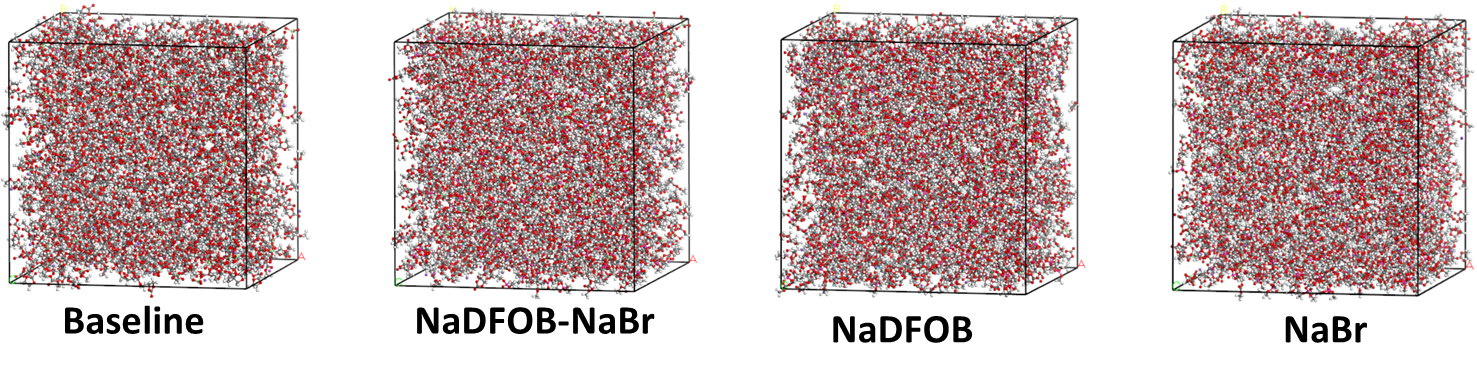


**Supplementary Fig. 13.** Representative solvation structure snapshots of different electrolytes obtained from MD simulations.


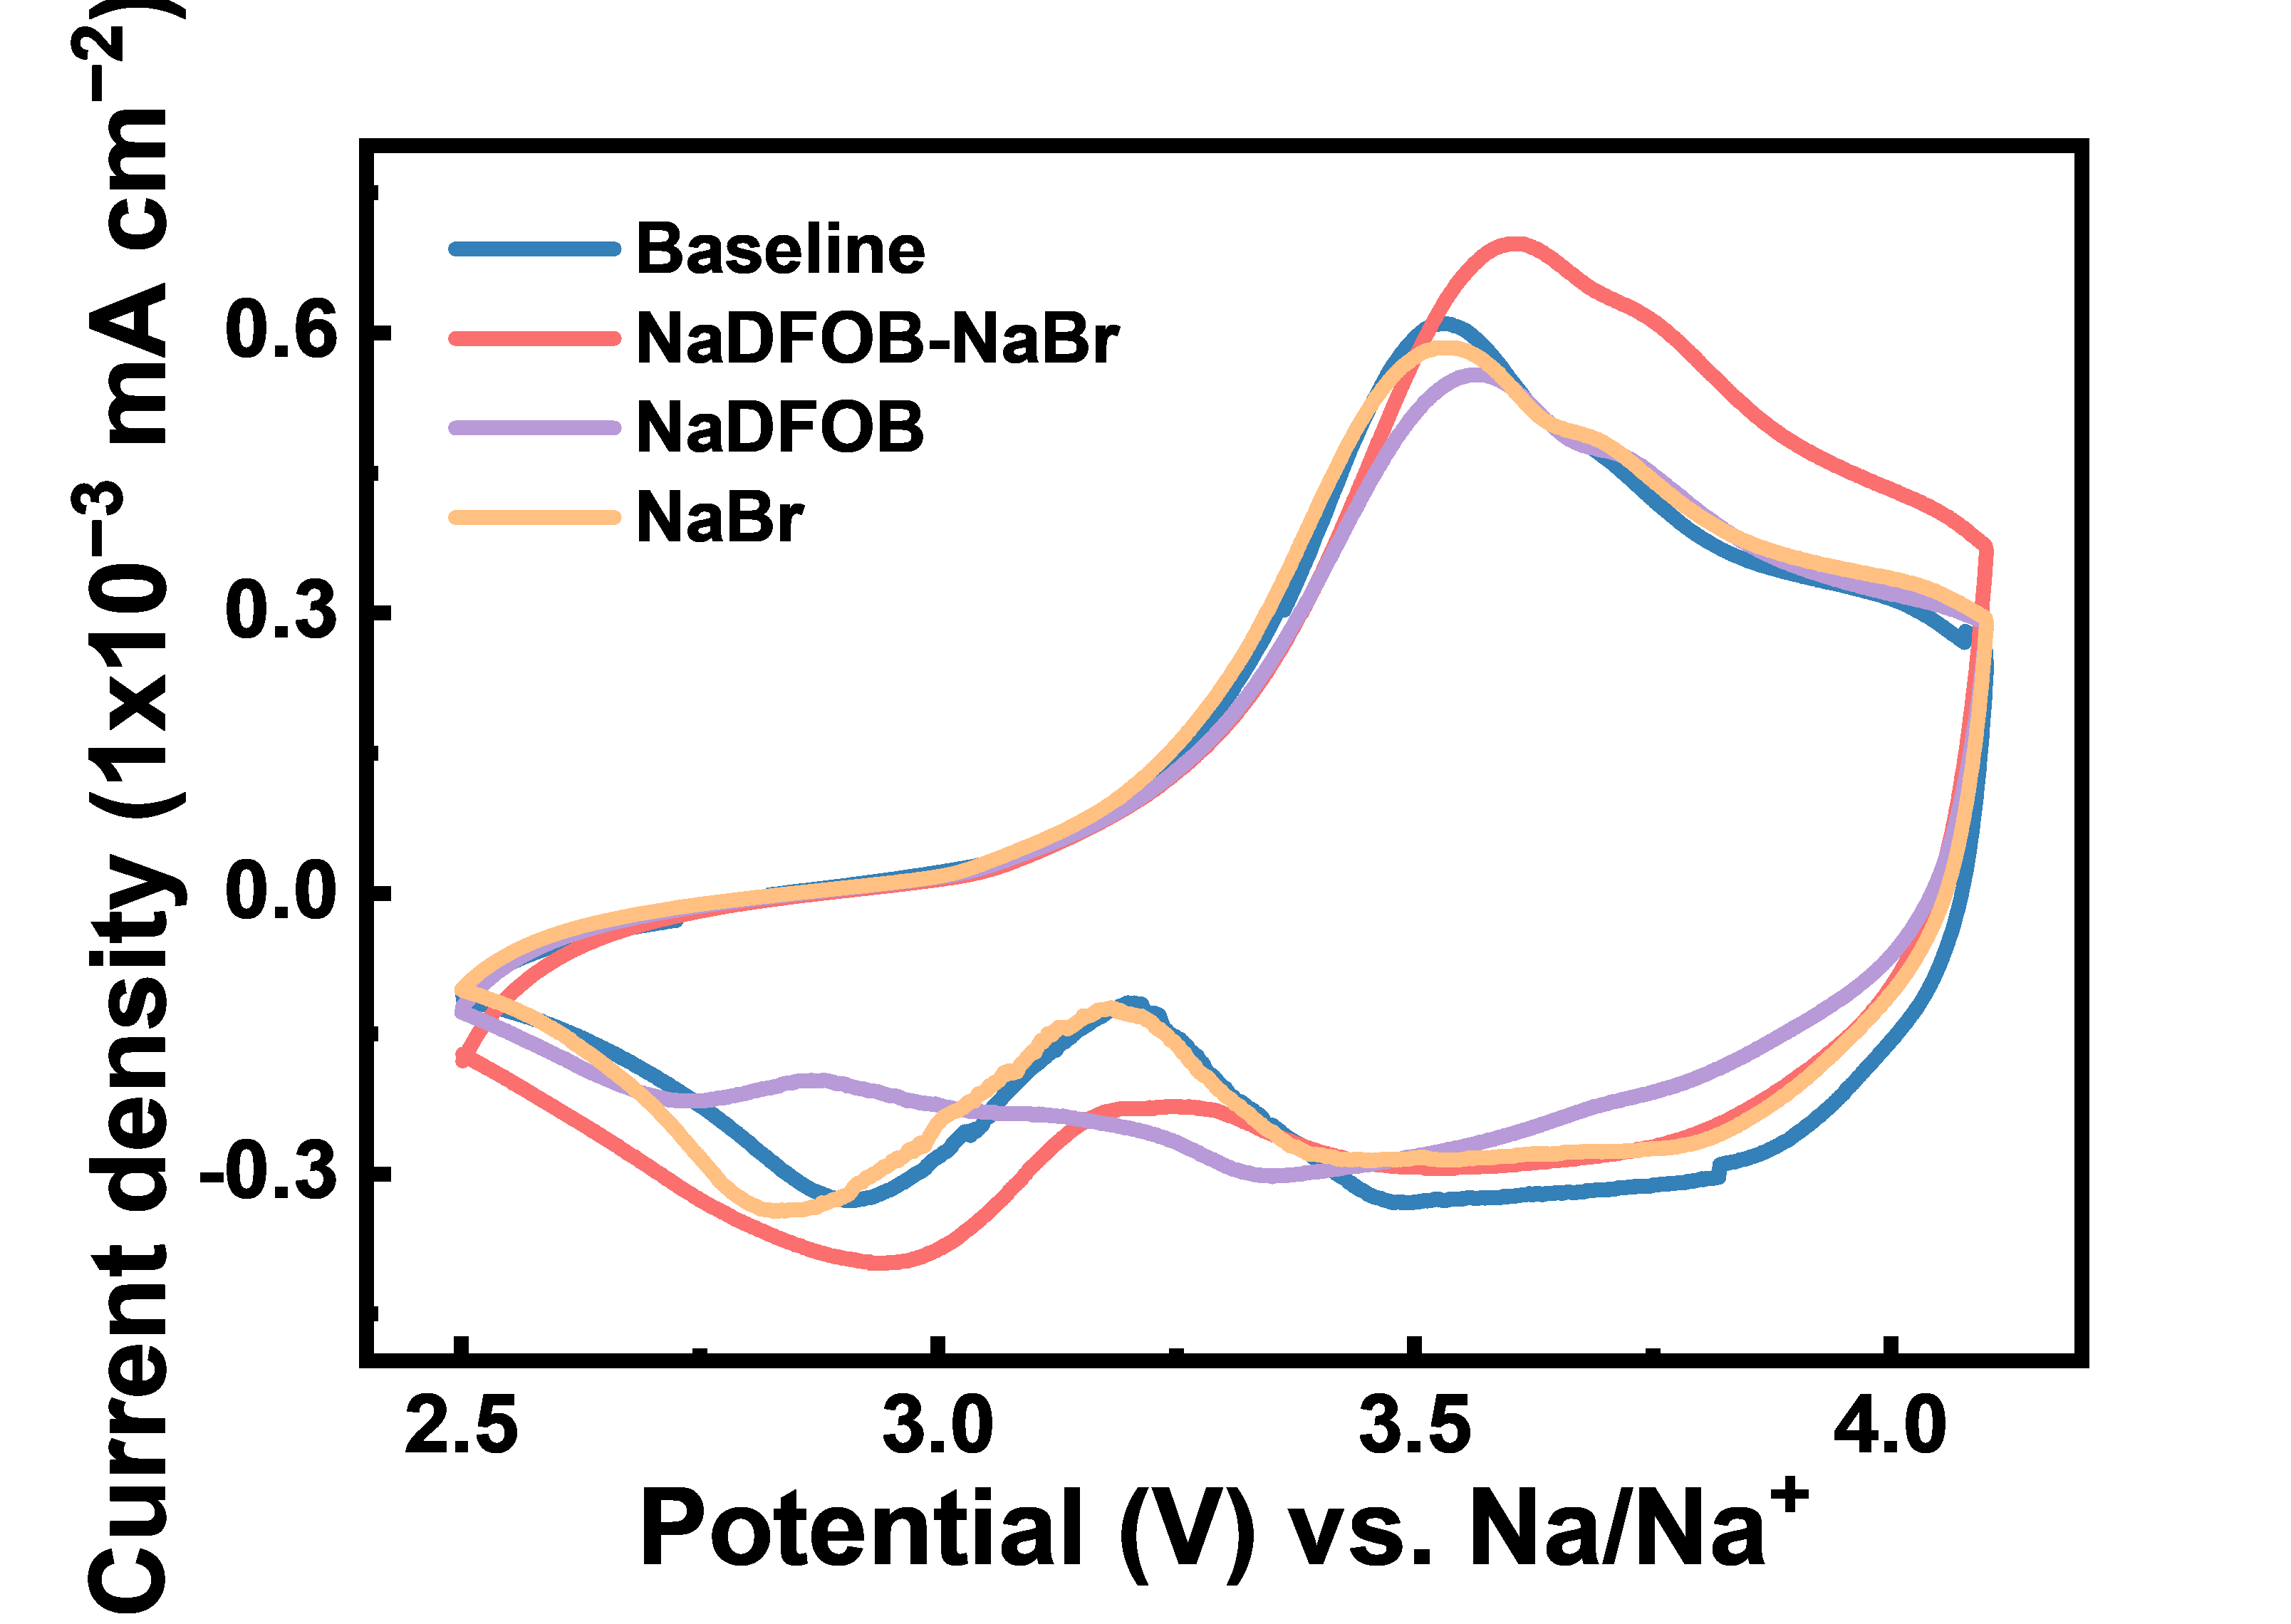


**Supplementary Fig. 14.** CV curves of Na||NMLTO cells with different electrolytes.


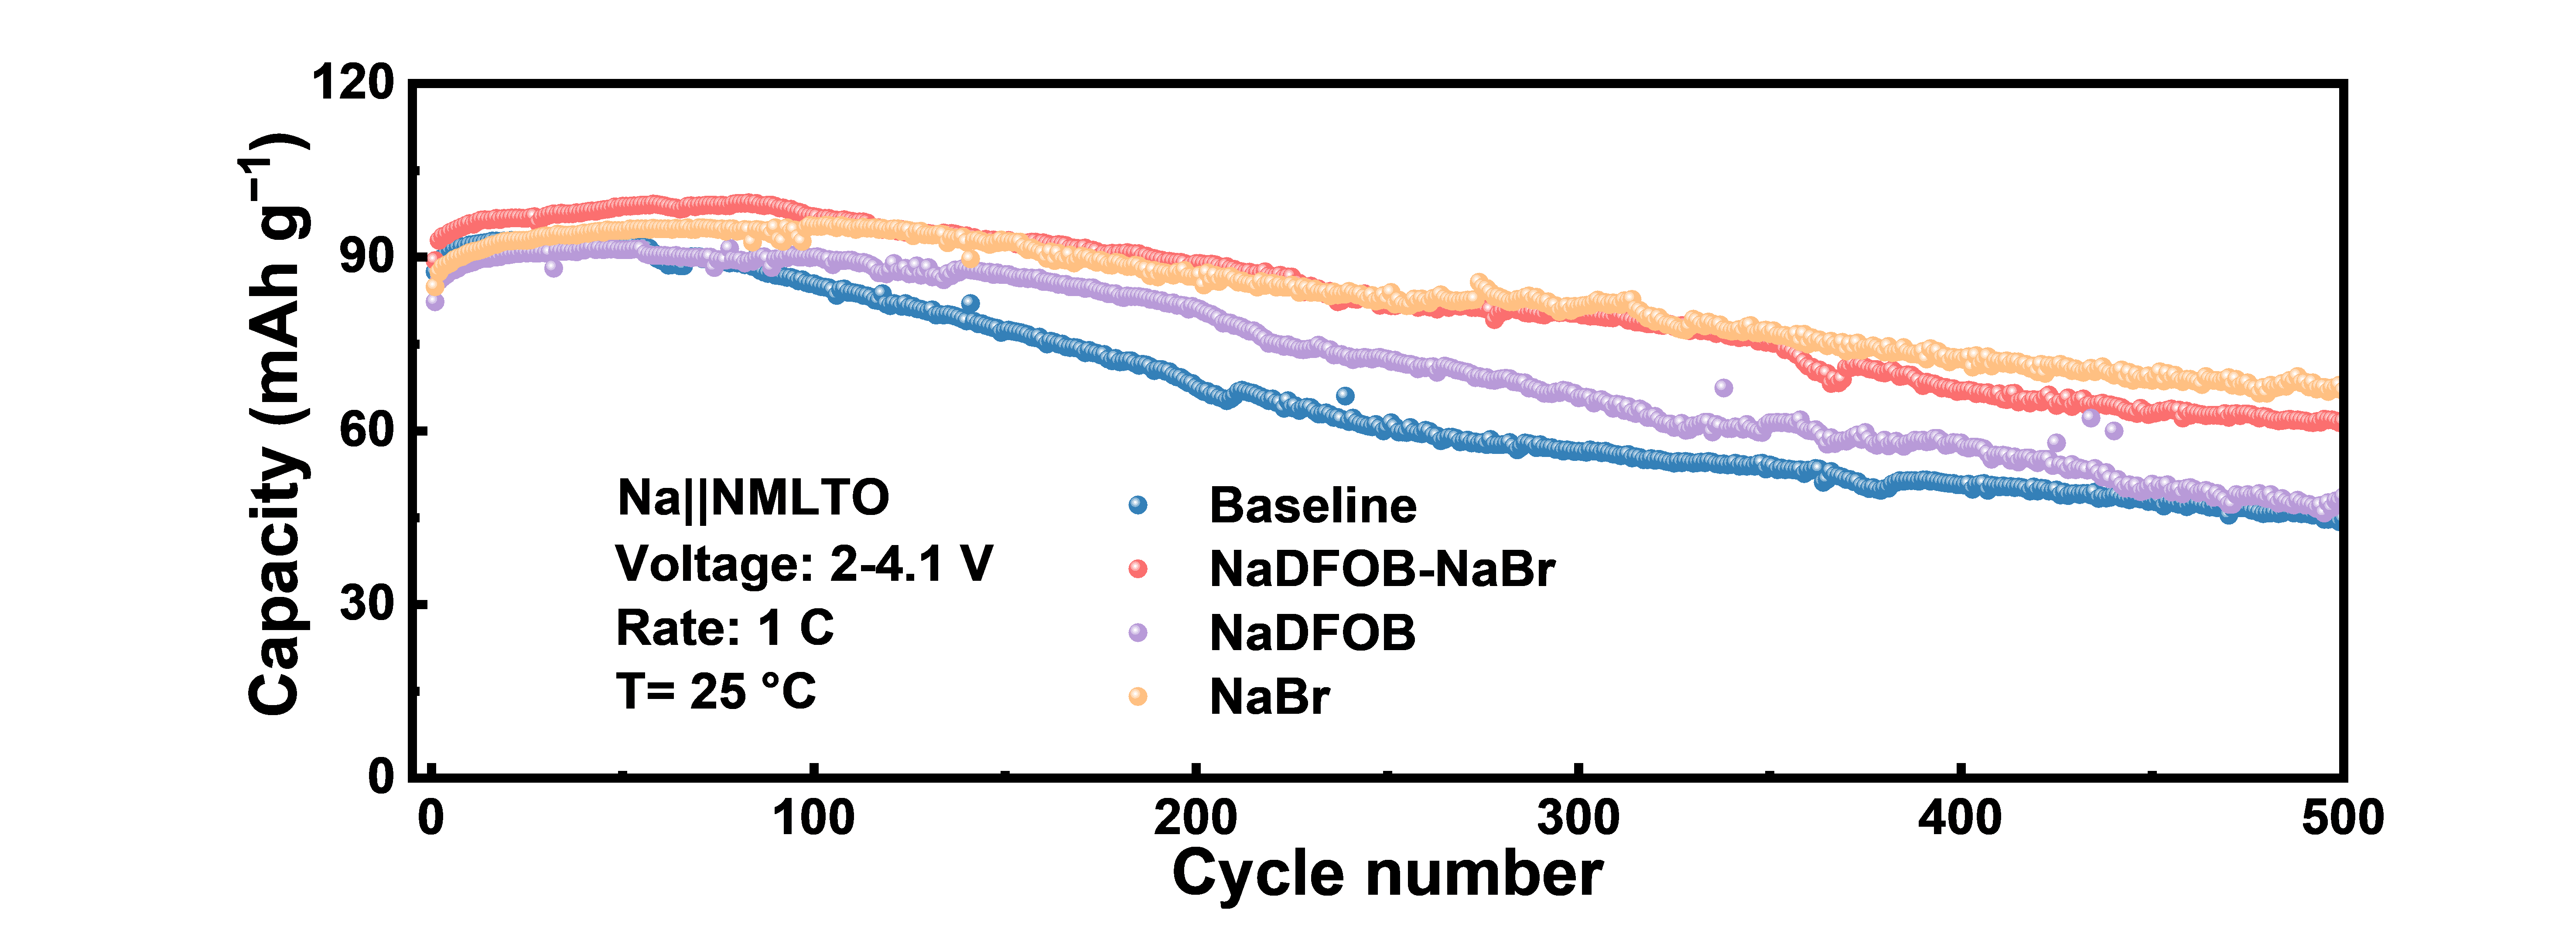


**Supplementary Fig. 15.** Cycling performance of Na||NMLTO cells with different electrolytes at 1 C.


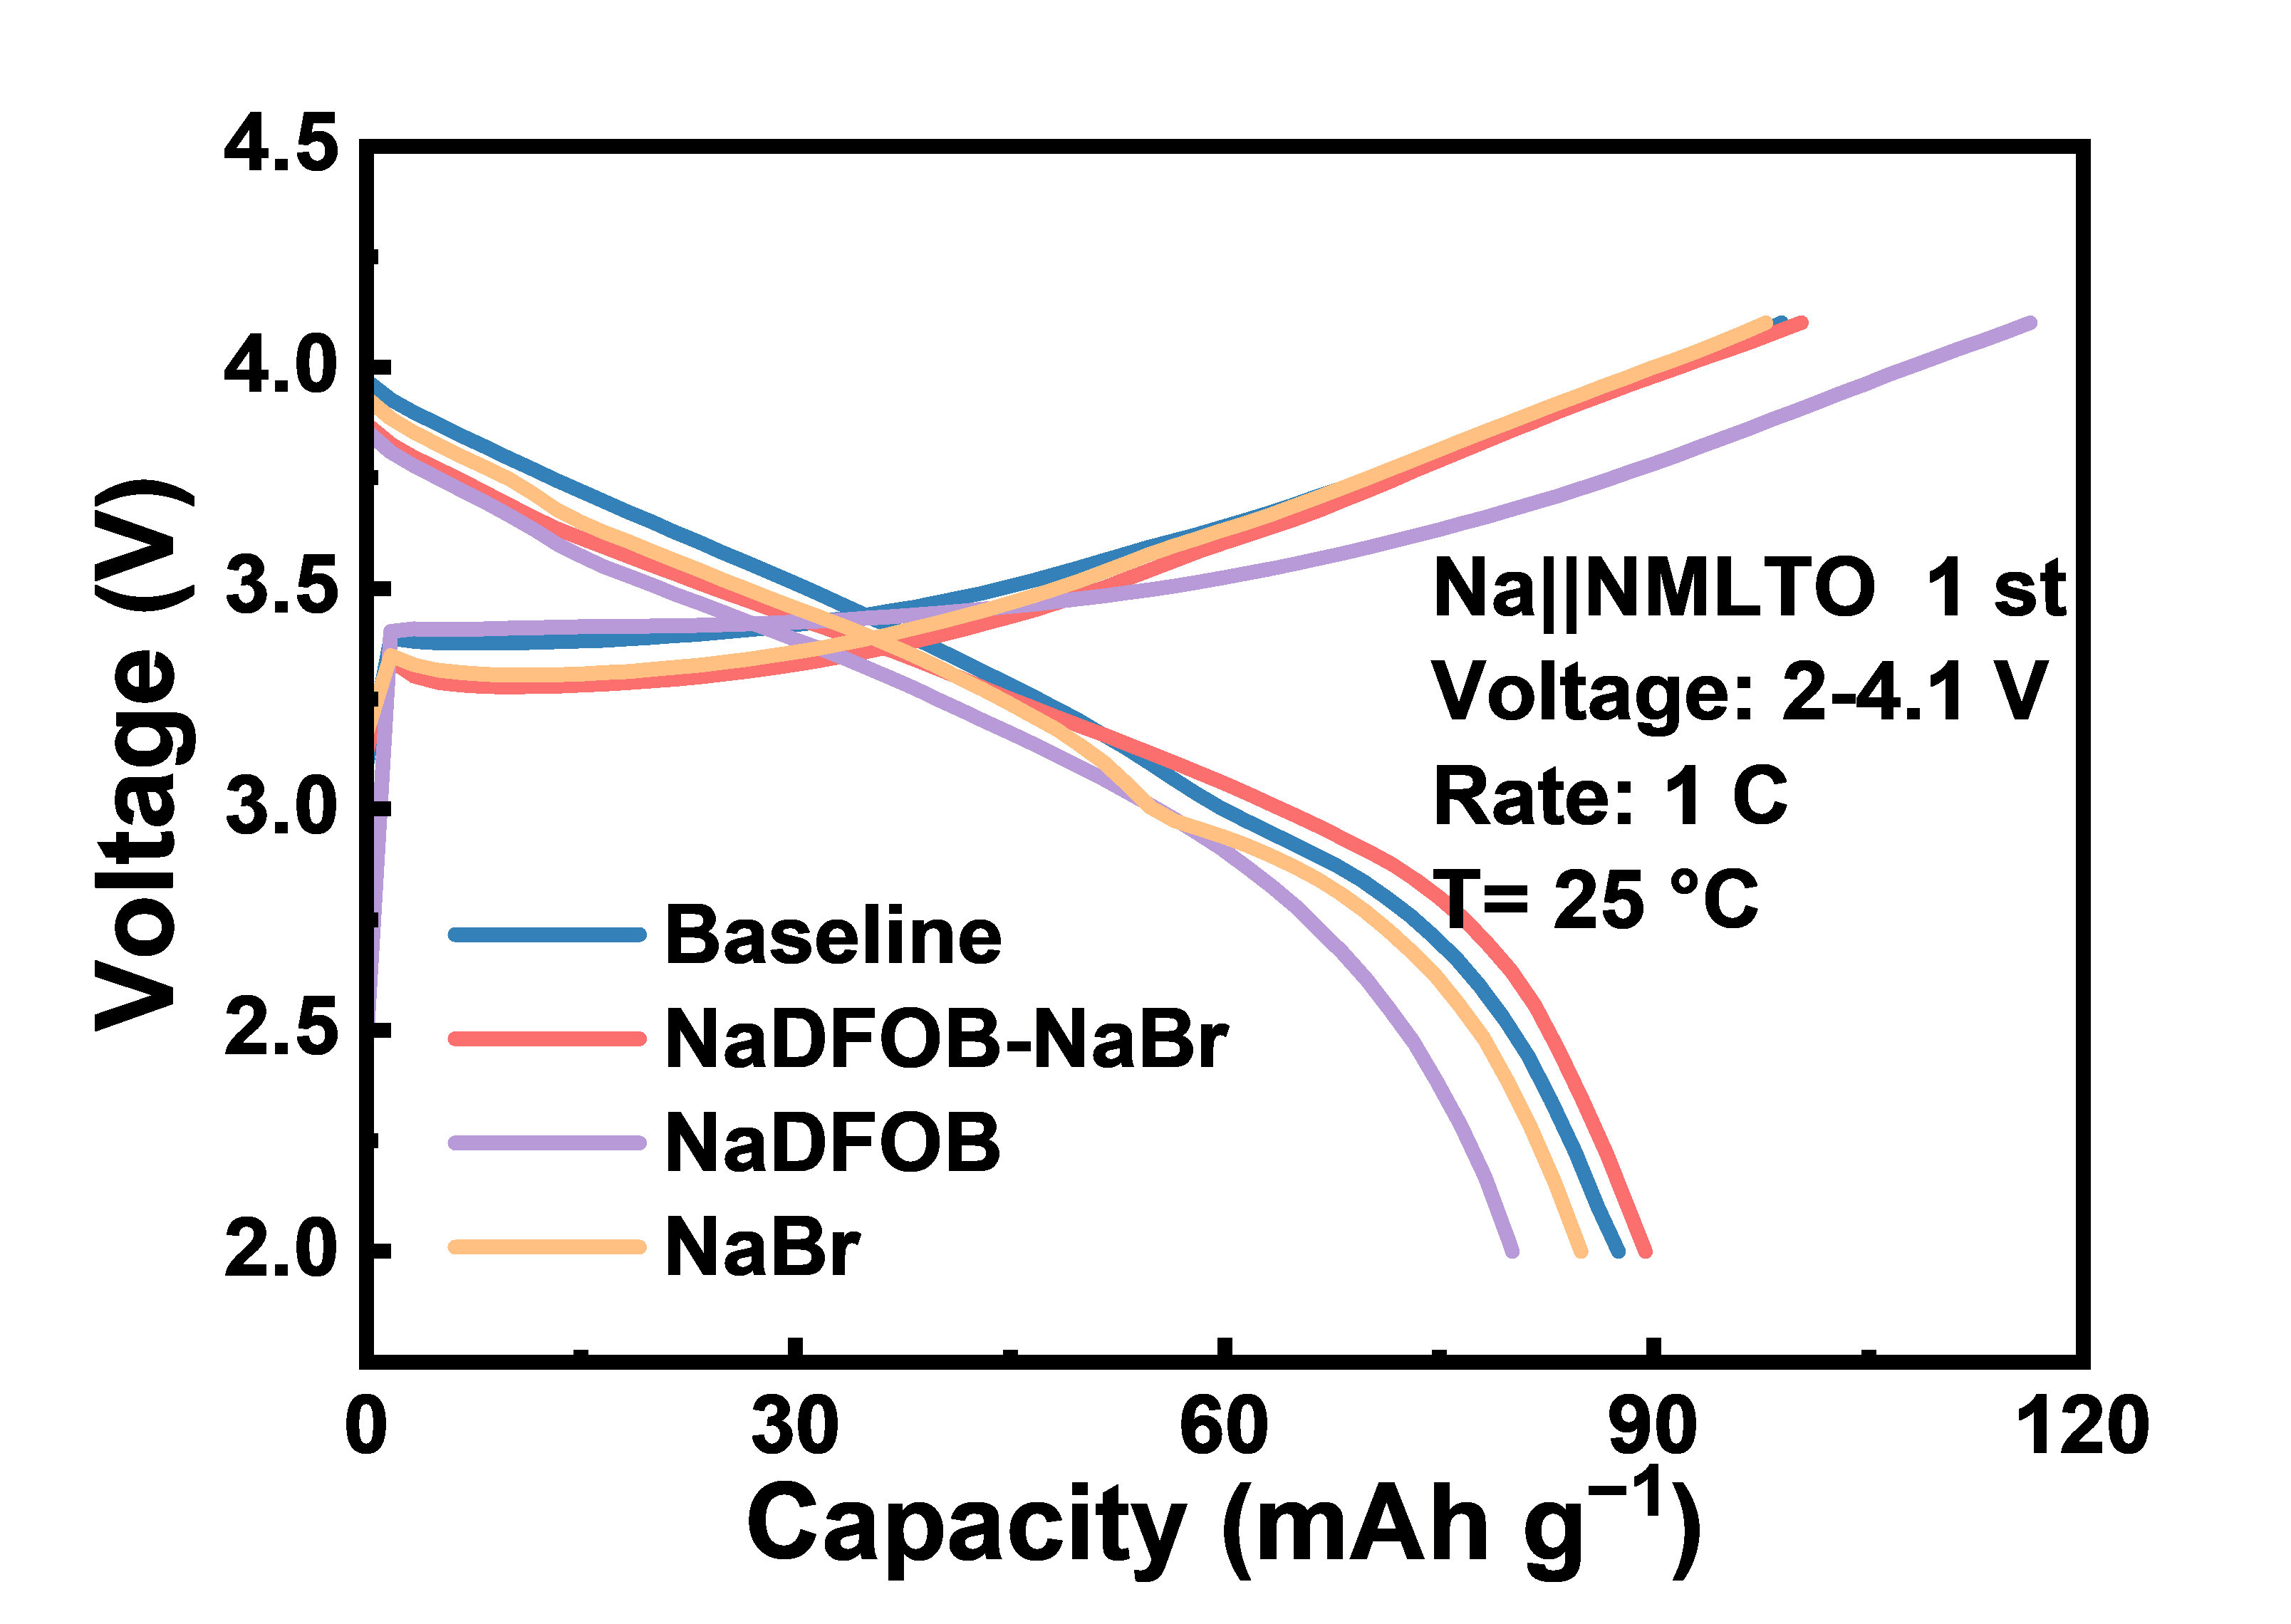


**Supplementary Fig. 16.** Initial charge/discharge curves of Na||NMLTO cells at 1 C.


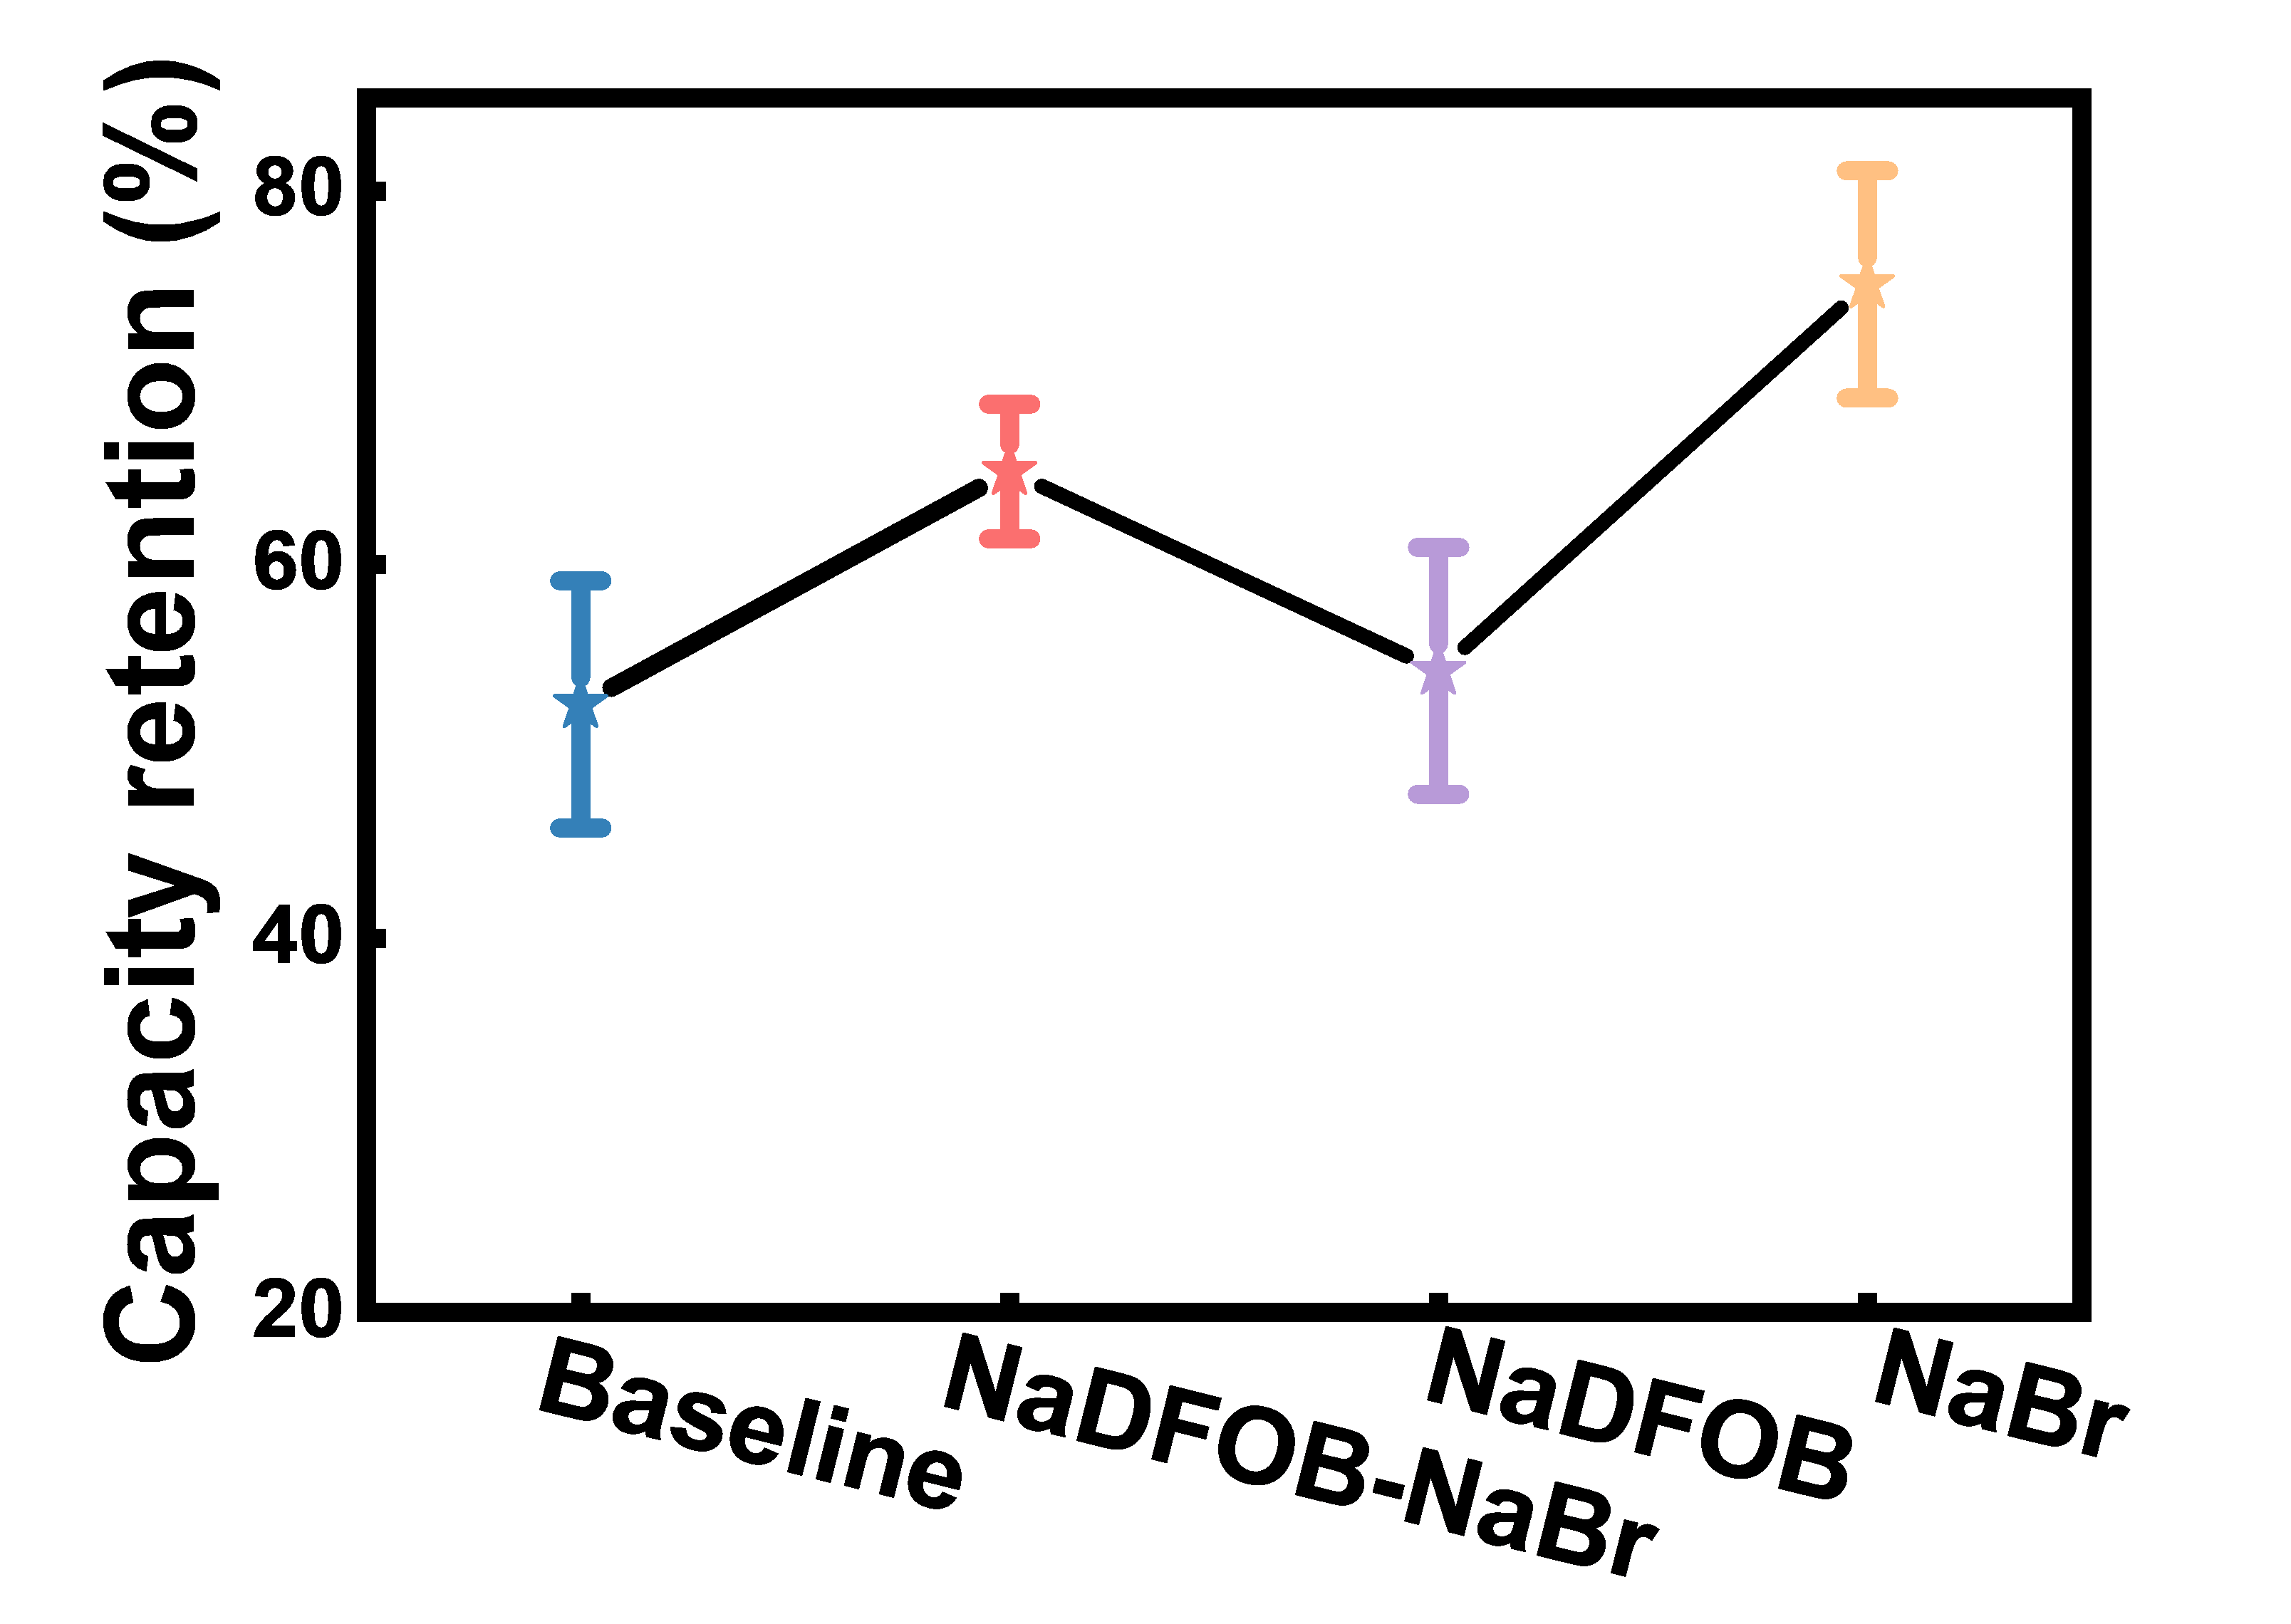


**Supplementary Fig. 17.** Statistical comparison of the capacity retention after 500 cycles for Na||NMLTO cells with different electrolytes at 1 C (presented as mean ± standard deviation).


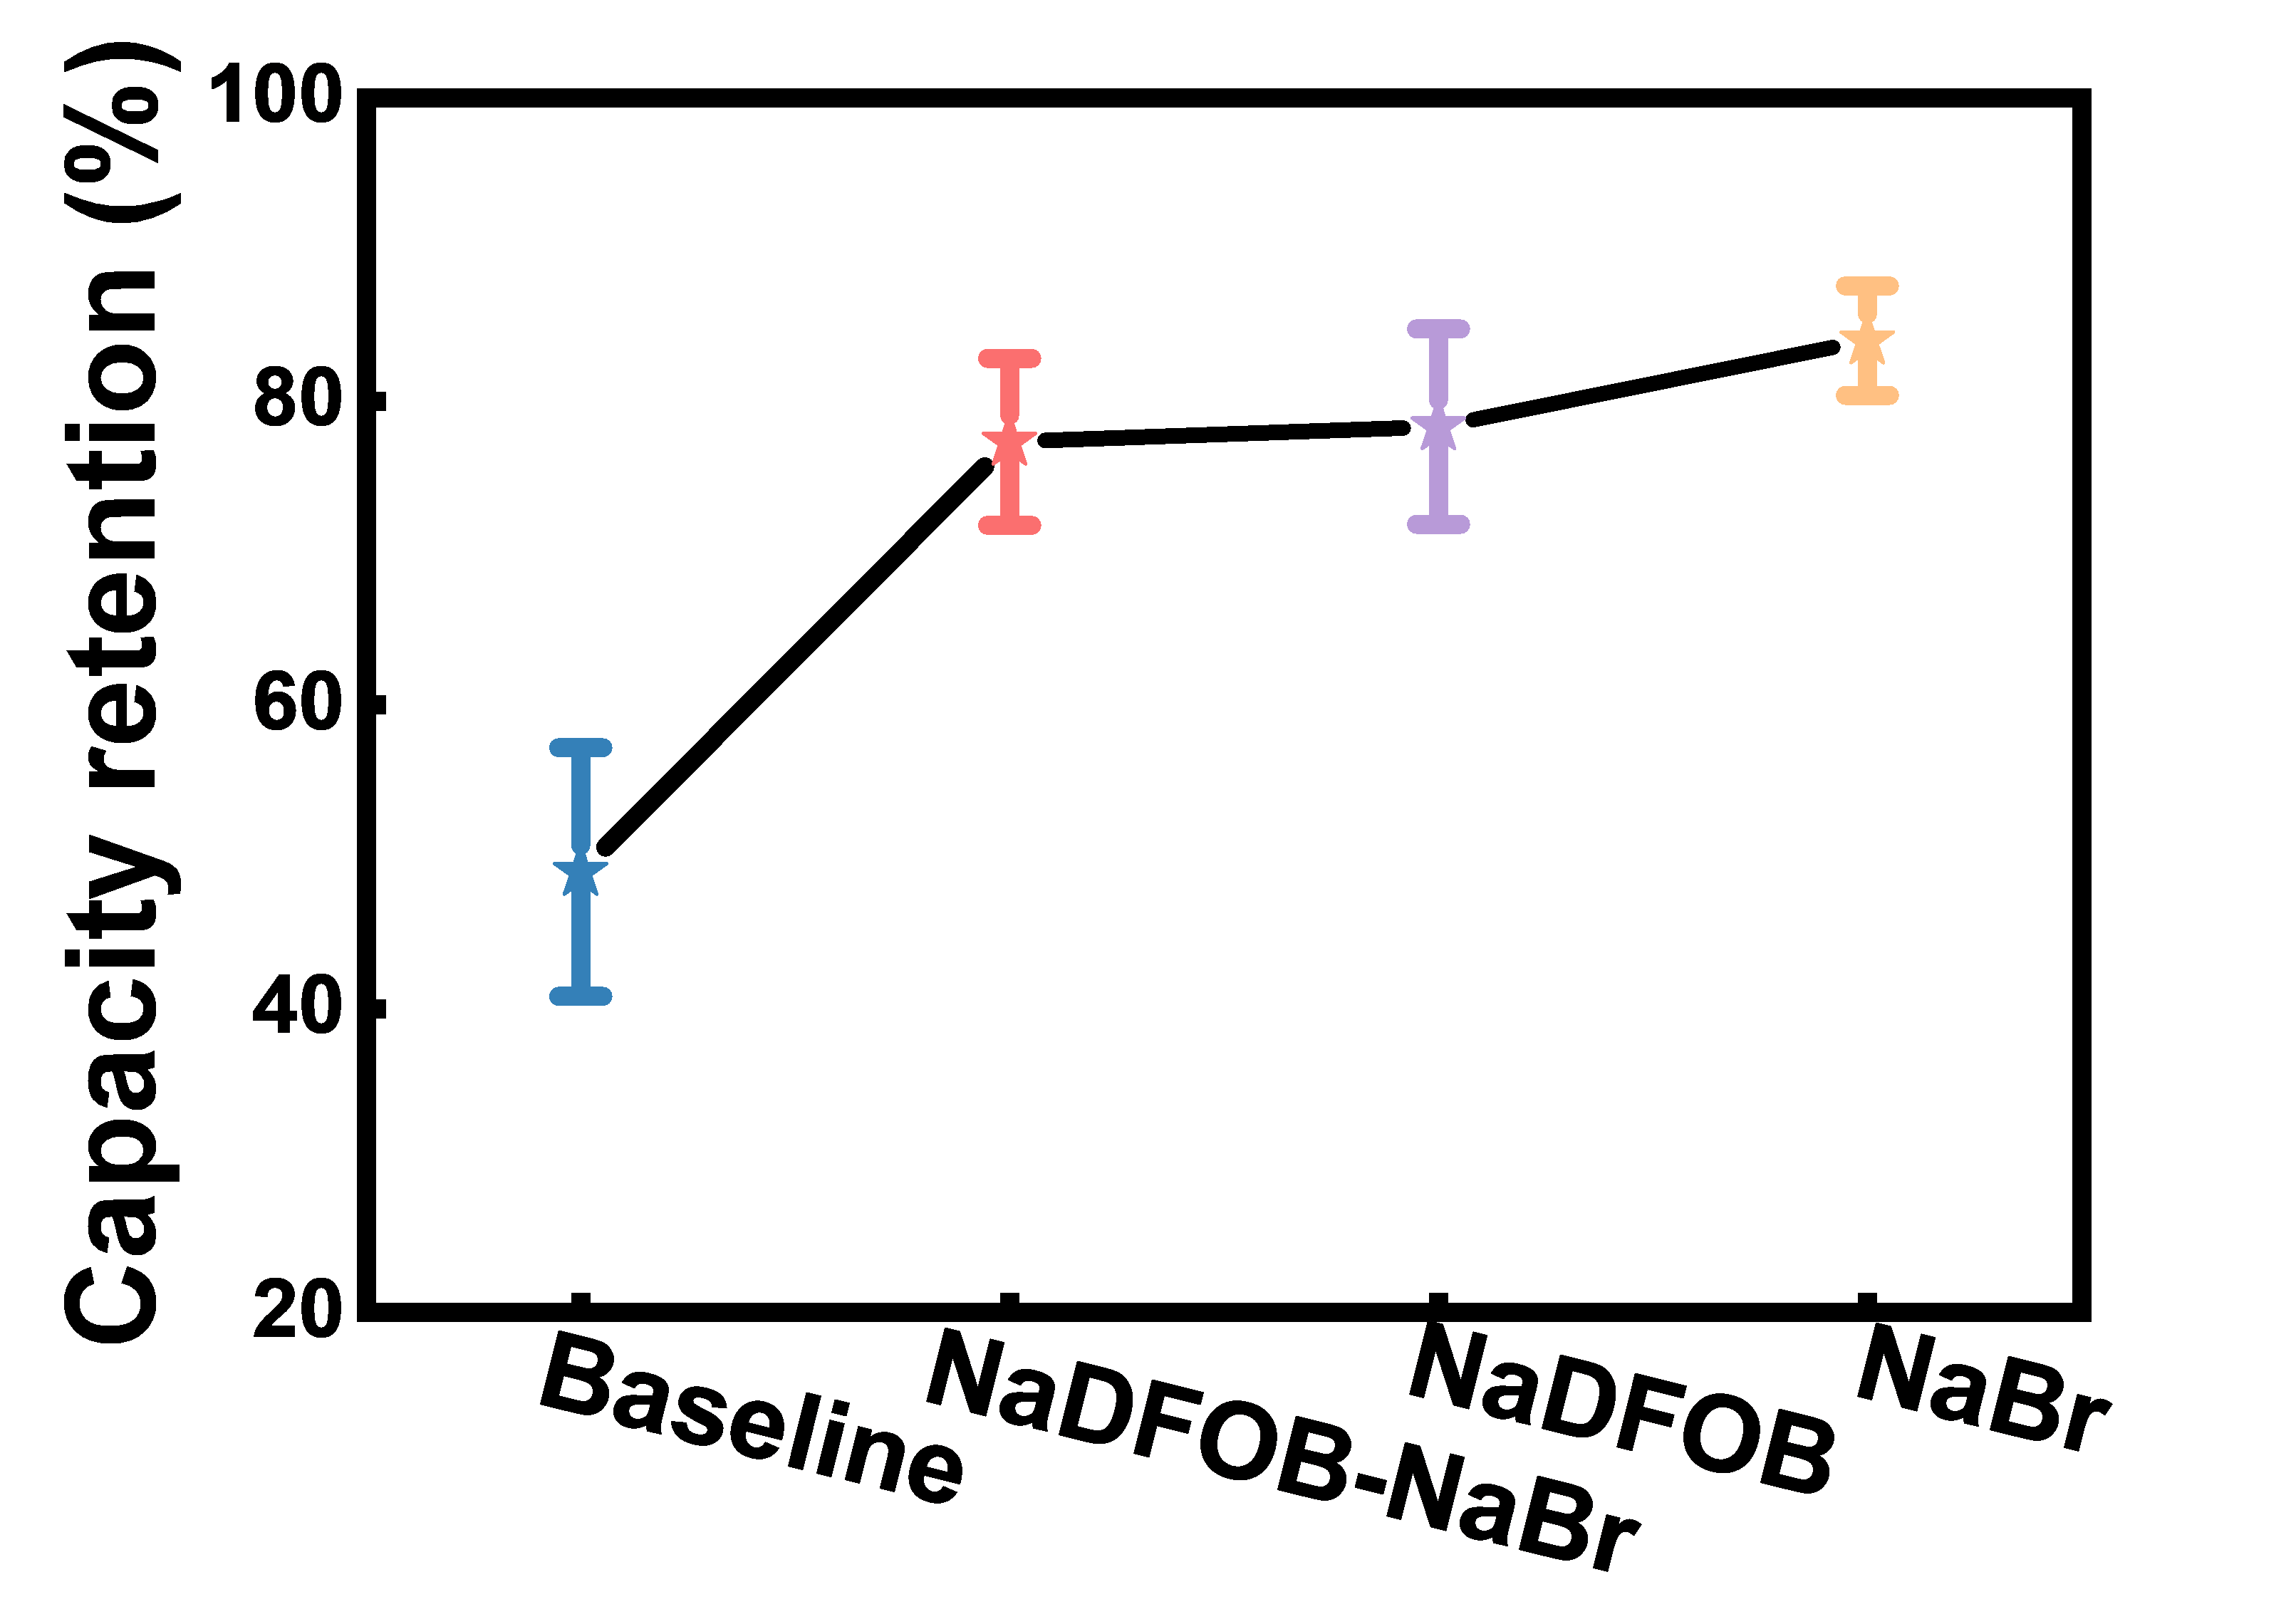


**Supplementary Fig. 18.** Statistical comparison of the capacity retention after 500 cycles for Na||NMLTO cells with different electrolytes at 5 C (presented as mean ± standard deviation).


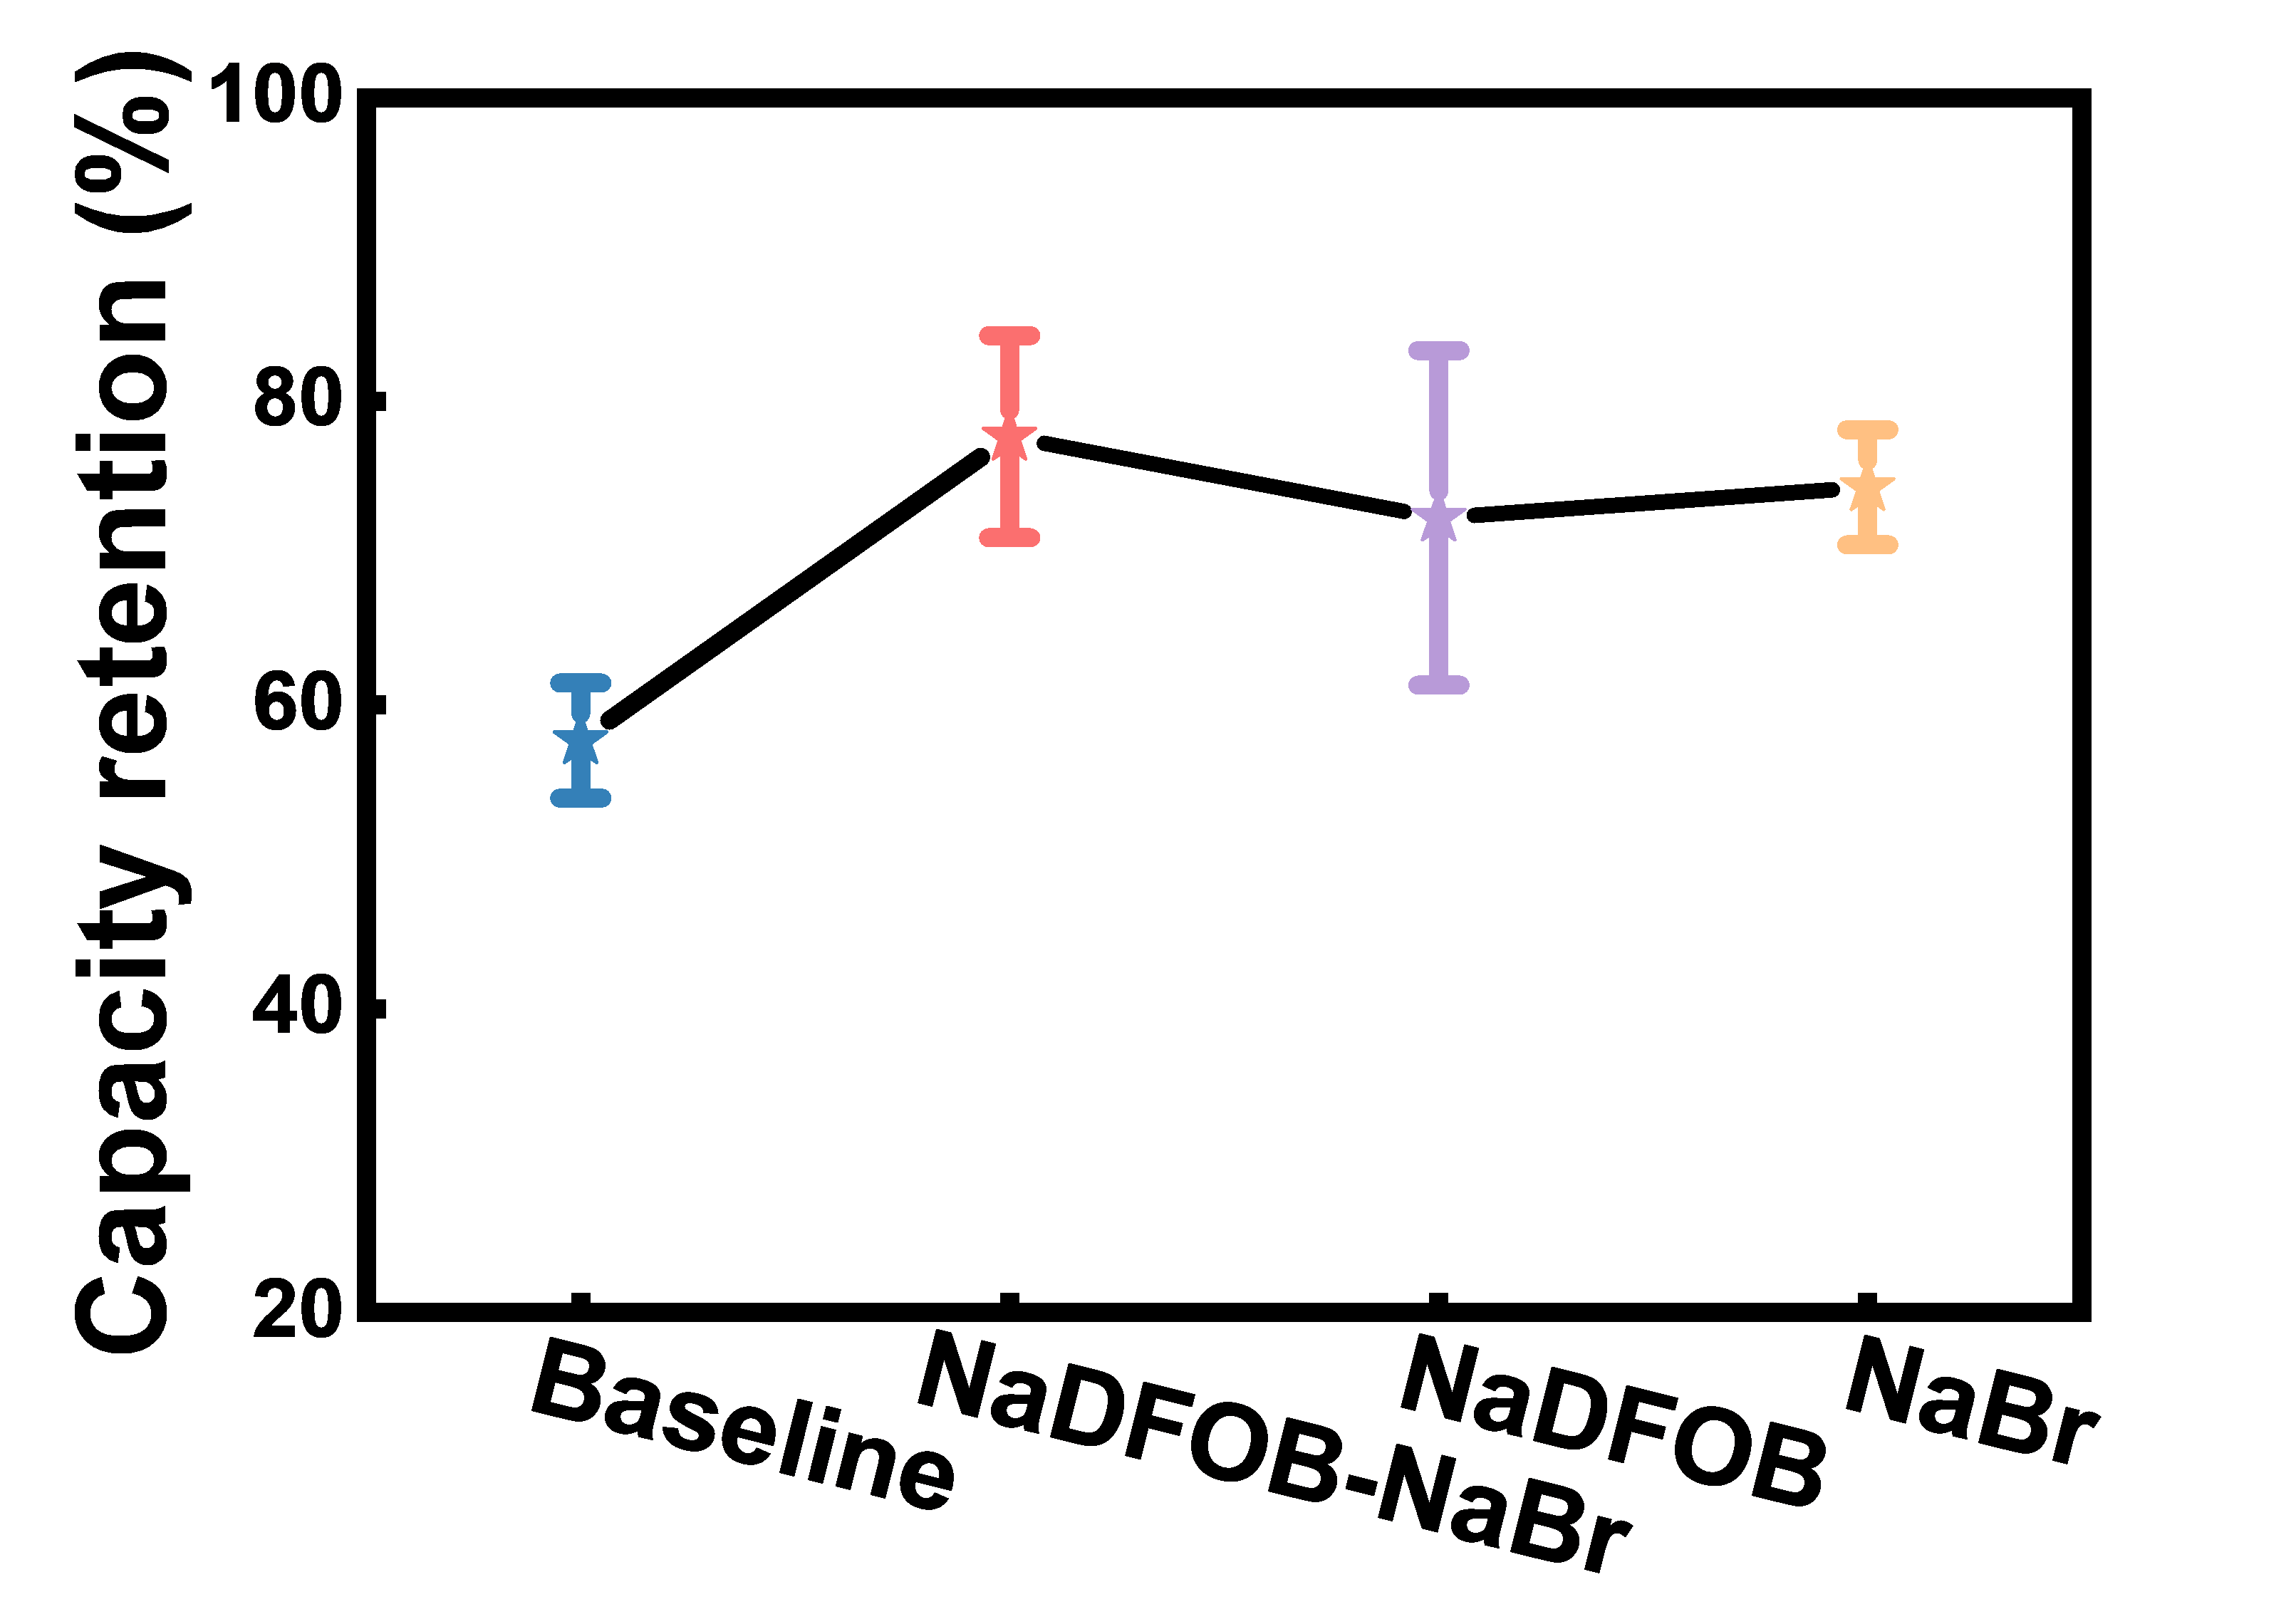


**Supplementary Fig. 19.** Statistical comparison of the capacity retention after 500 cycles for Na||NMLTO cells with different electrolytes at 5 C and 60 °C (presented as mean ± standard deviation).


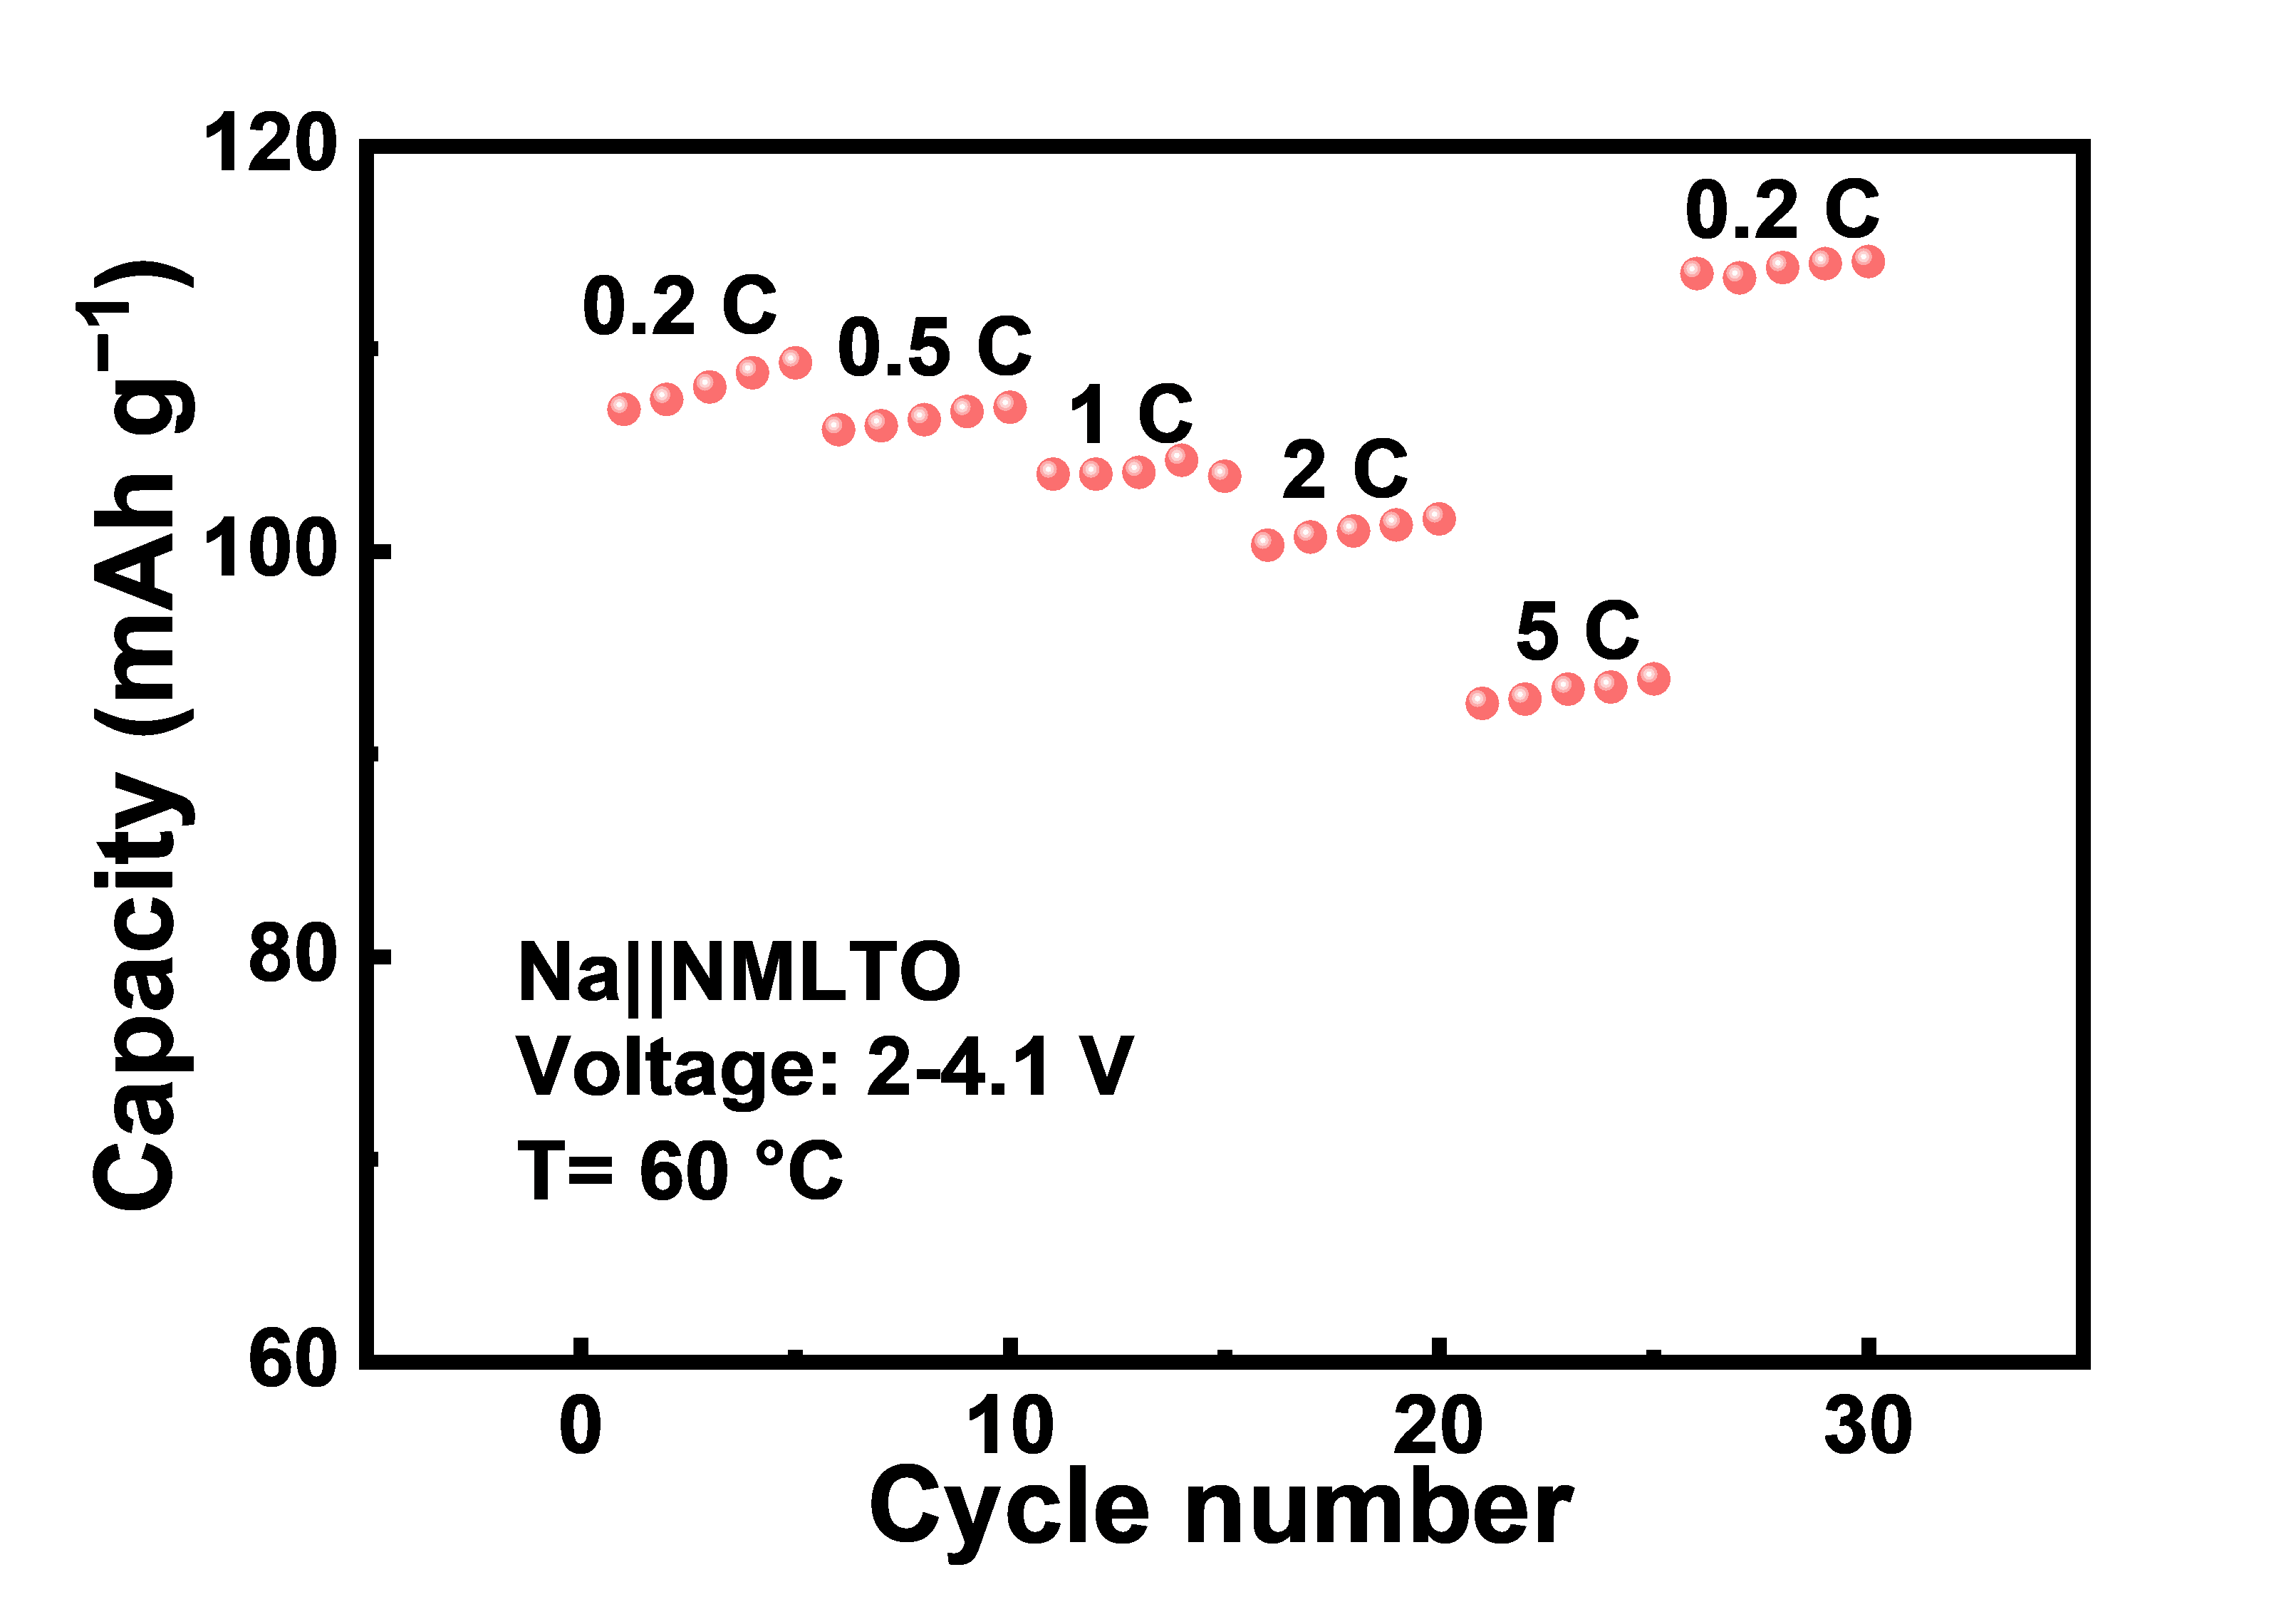


**Supplementary Fig. 20.** Rate capability of Na||NMLTO cell with NaDFOB-NaBr electrolyte at 60 ℃.


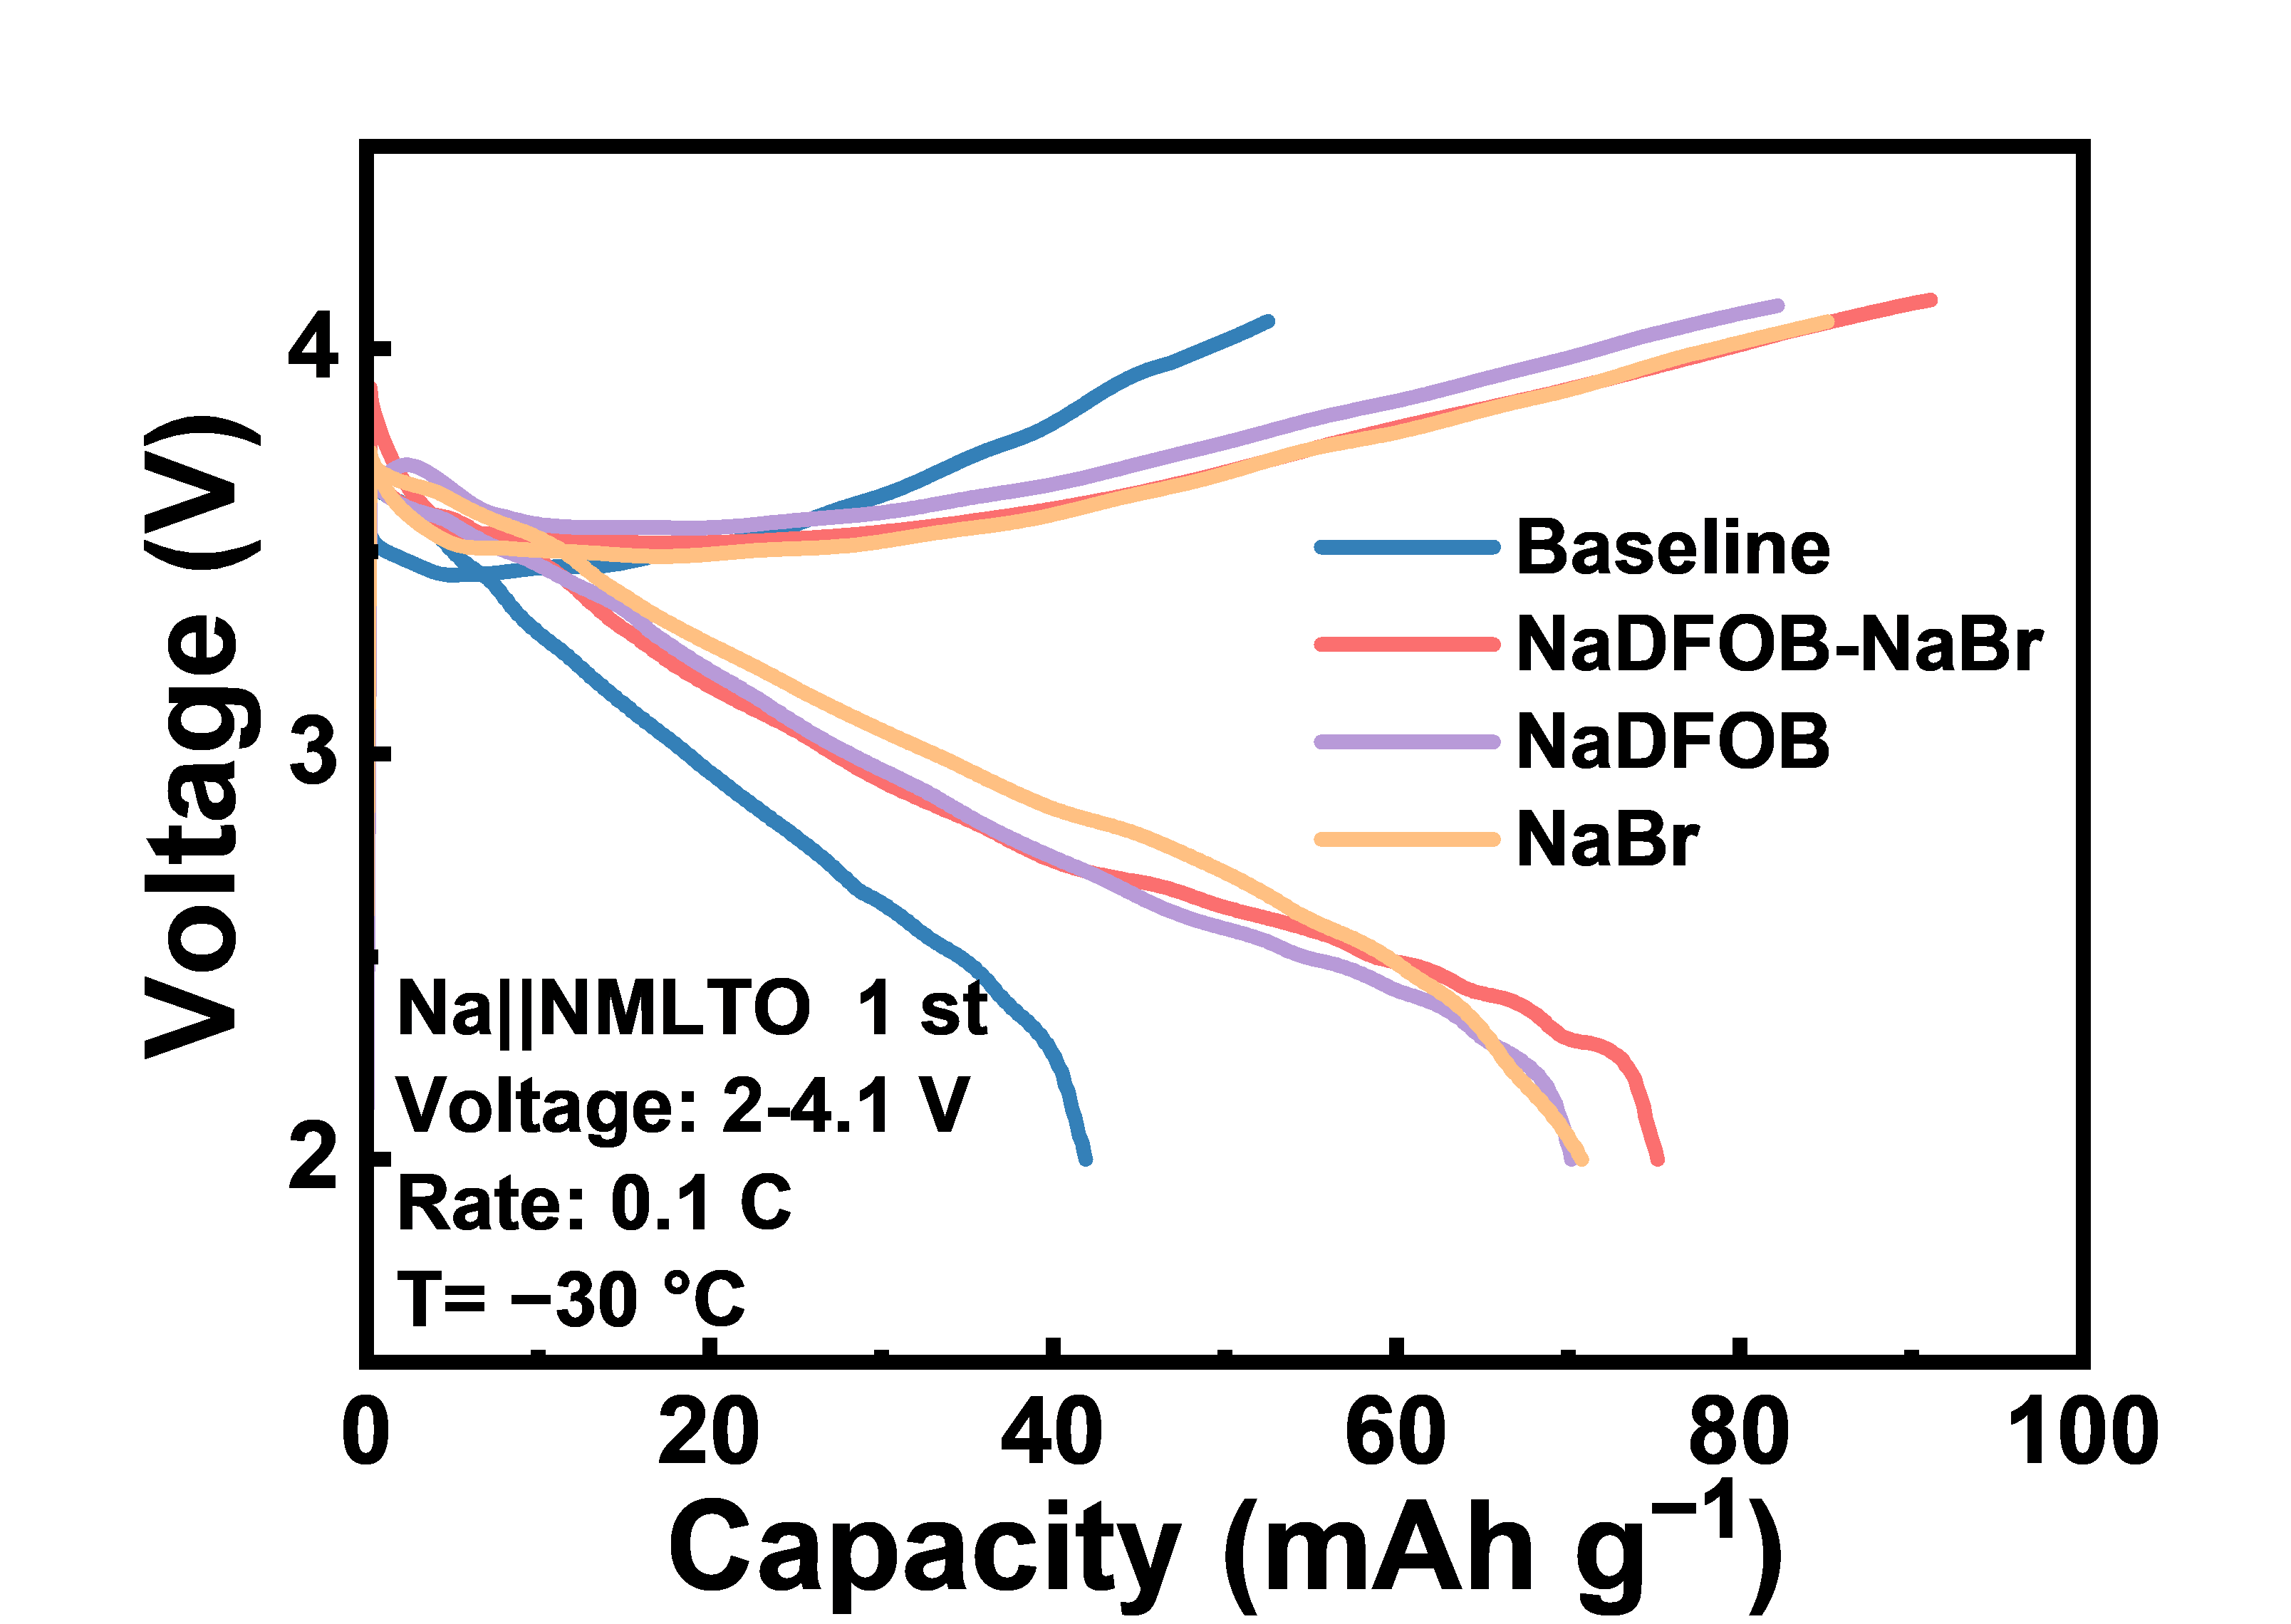


**Supplementary Fig. 21.** Initial charge/discharge curves of Na||NMLTO cells at 0.1 C and −30 ℃.

**
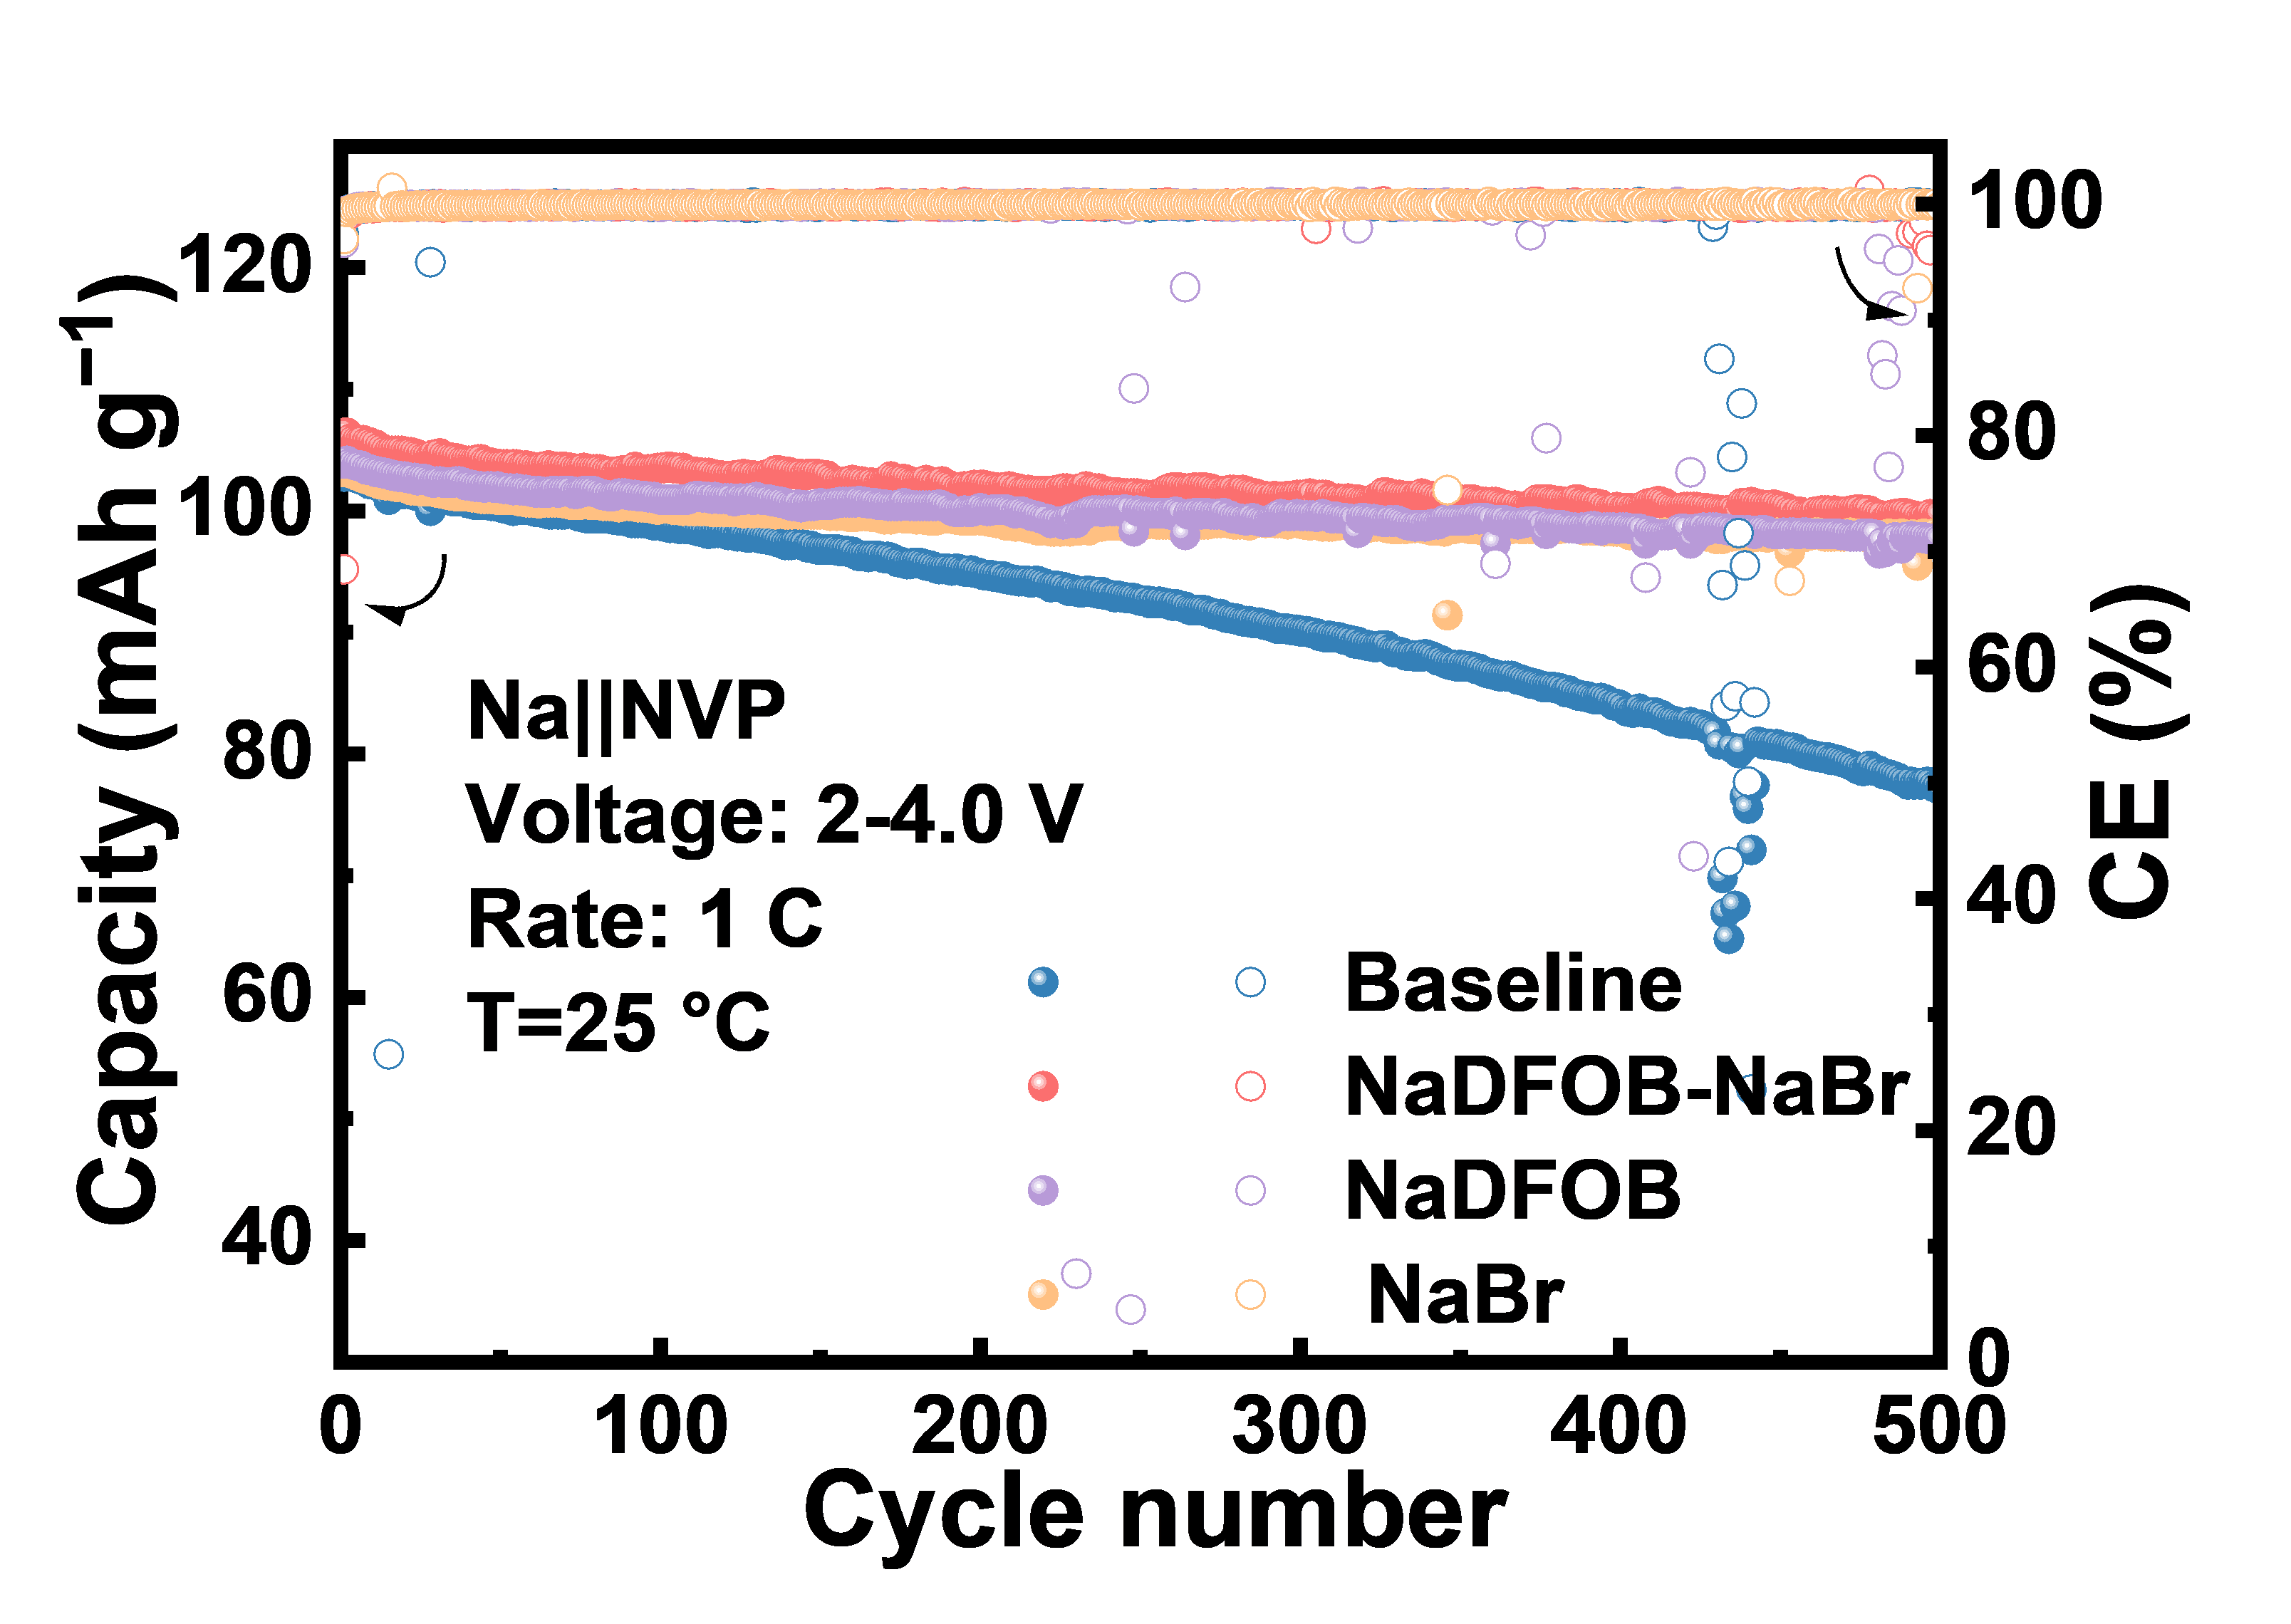
**

**Supplementary Fig. 22.** Cycling performance of Na||NVP cells with different electrolytes at 1 C.


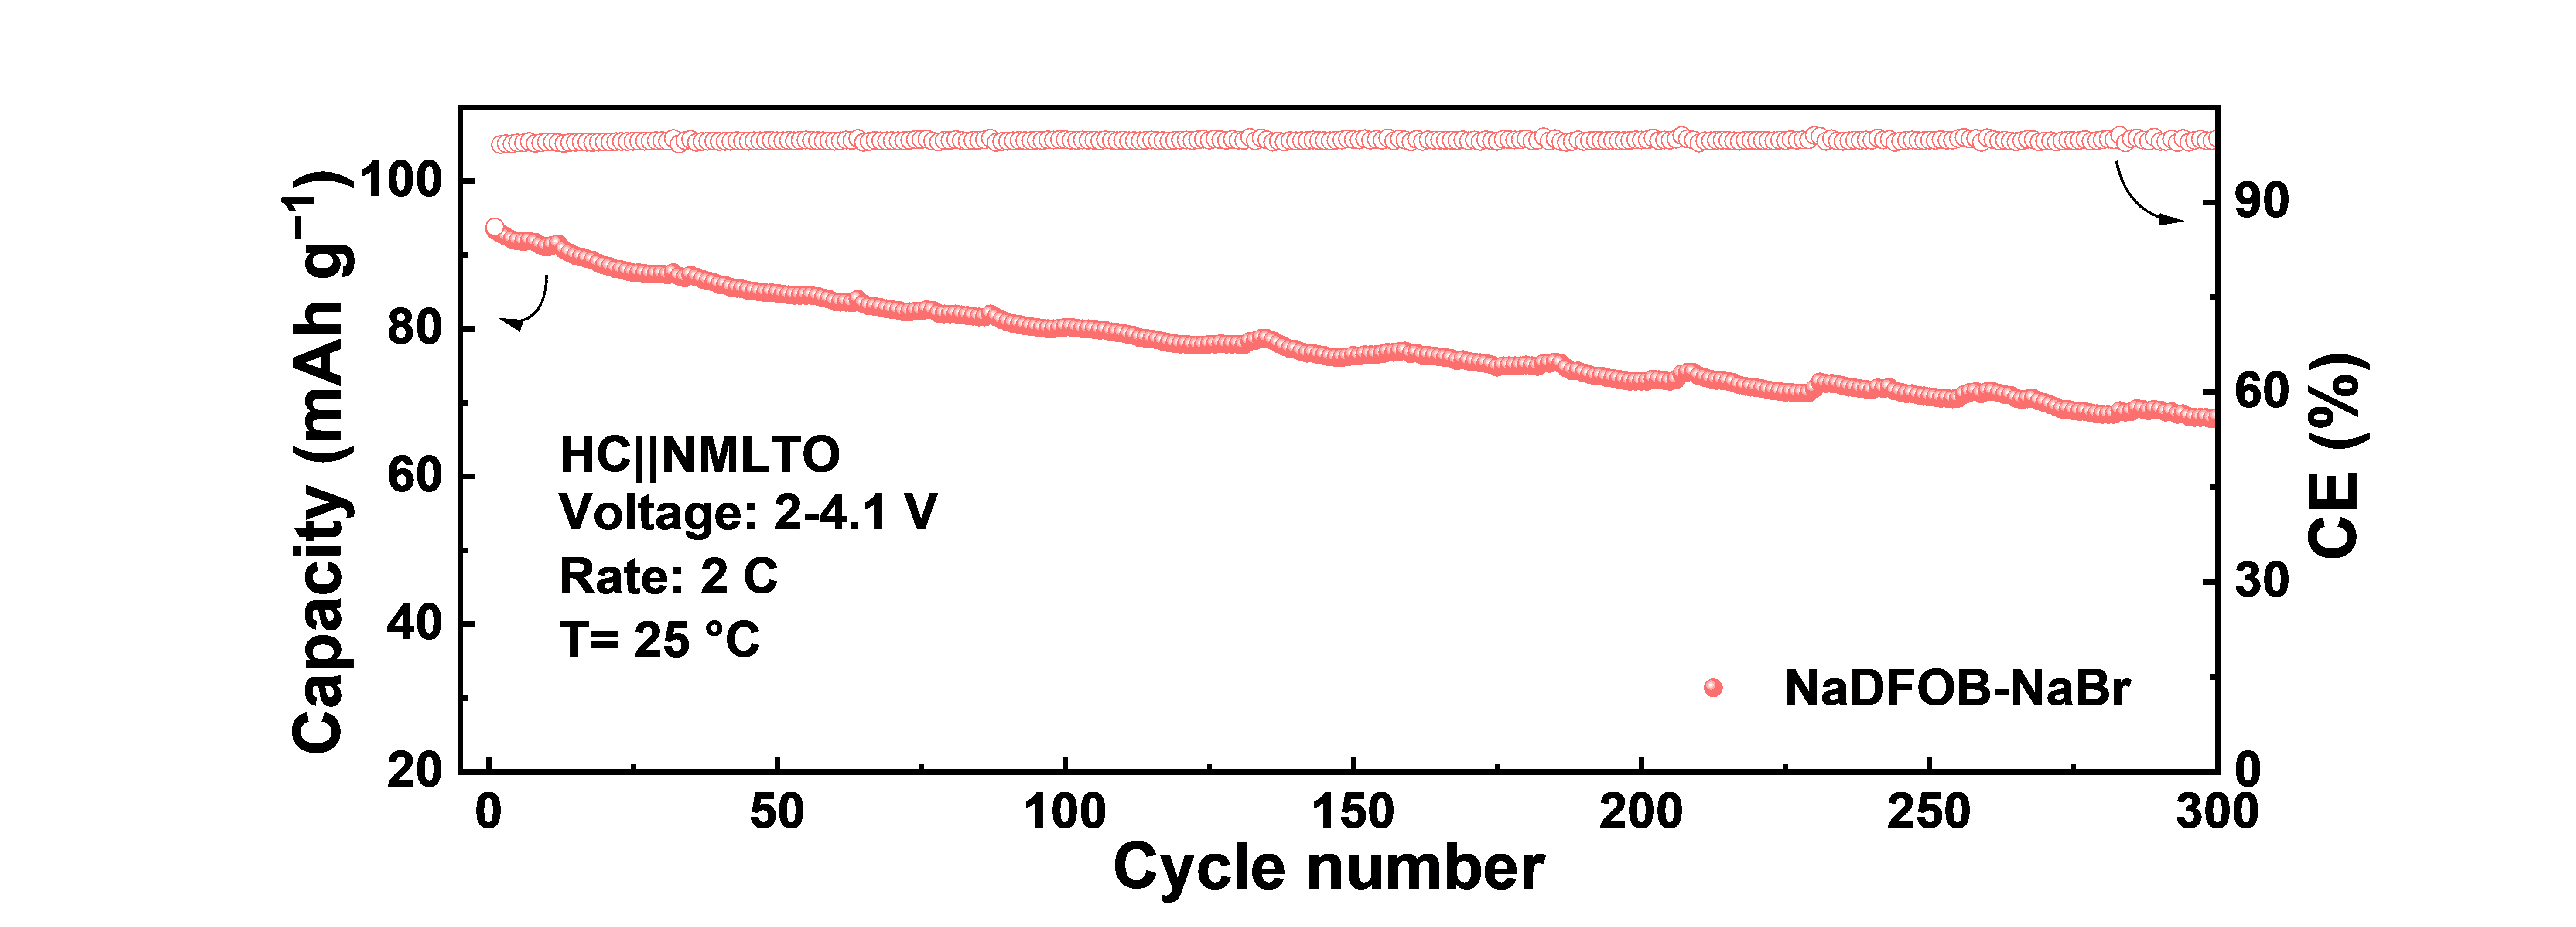


**Supplementary Fig. 23.** Cycling performance of HC||NMLTO cell with NaDFOB-NaBr electrolyte at 2 C.


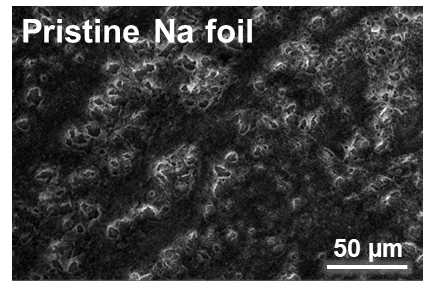


**Supplementary Fig. 24.** SEM image of pristine Na metal surface.


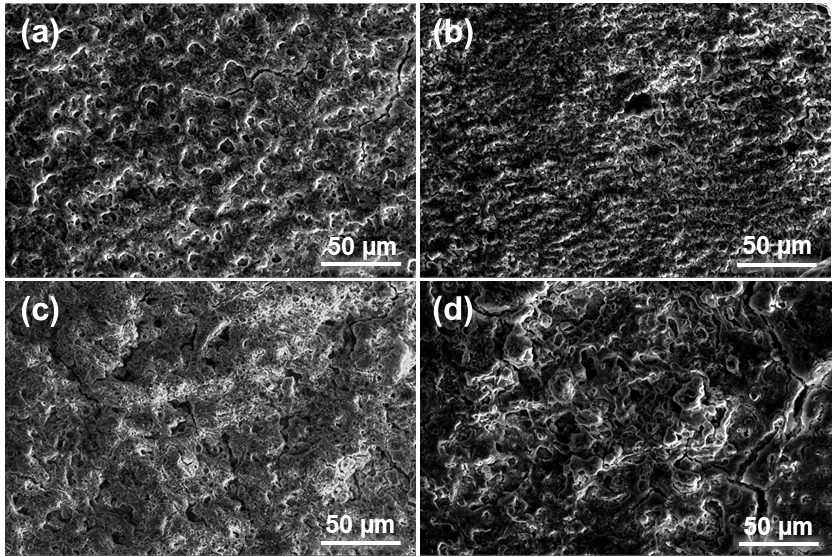


**Supplementary Fig. 25.** SEM images of Na metal surface after cycling with different electrolytes: (a) Baseline, (b) NaDFOB-NaBr, (c) NaDFOB, and (d) NaBr.


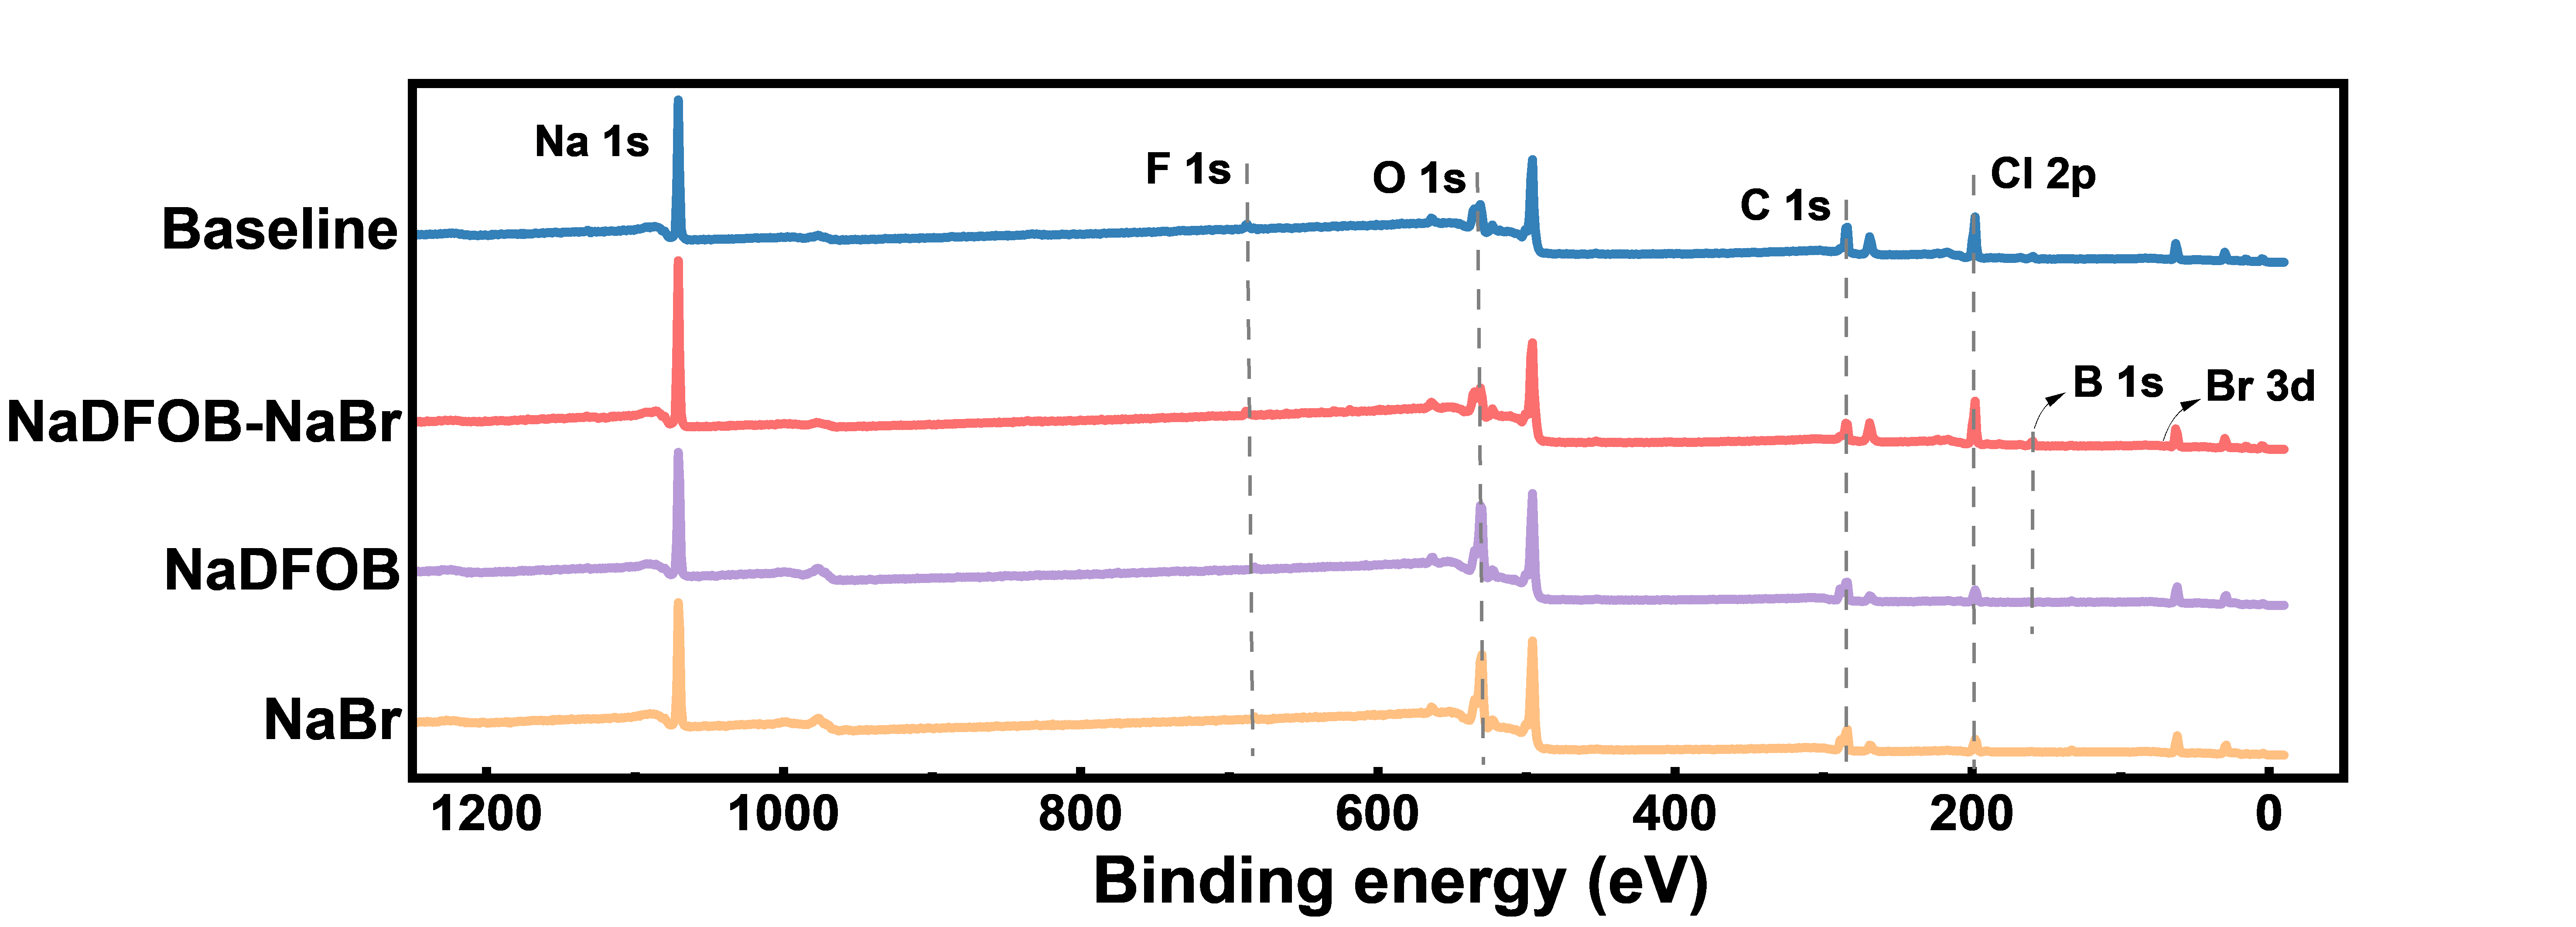


**Supplementary Fig. 26.** Survey XPS spectra of the cycled Na metal surface.


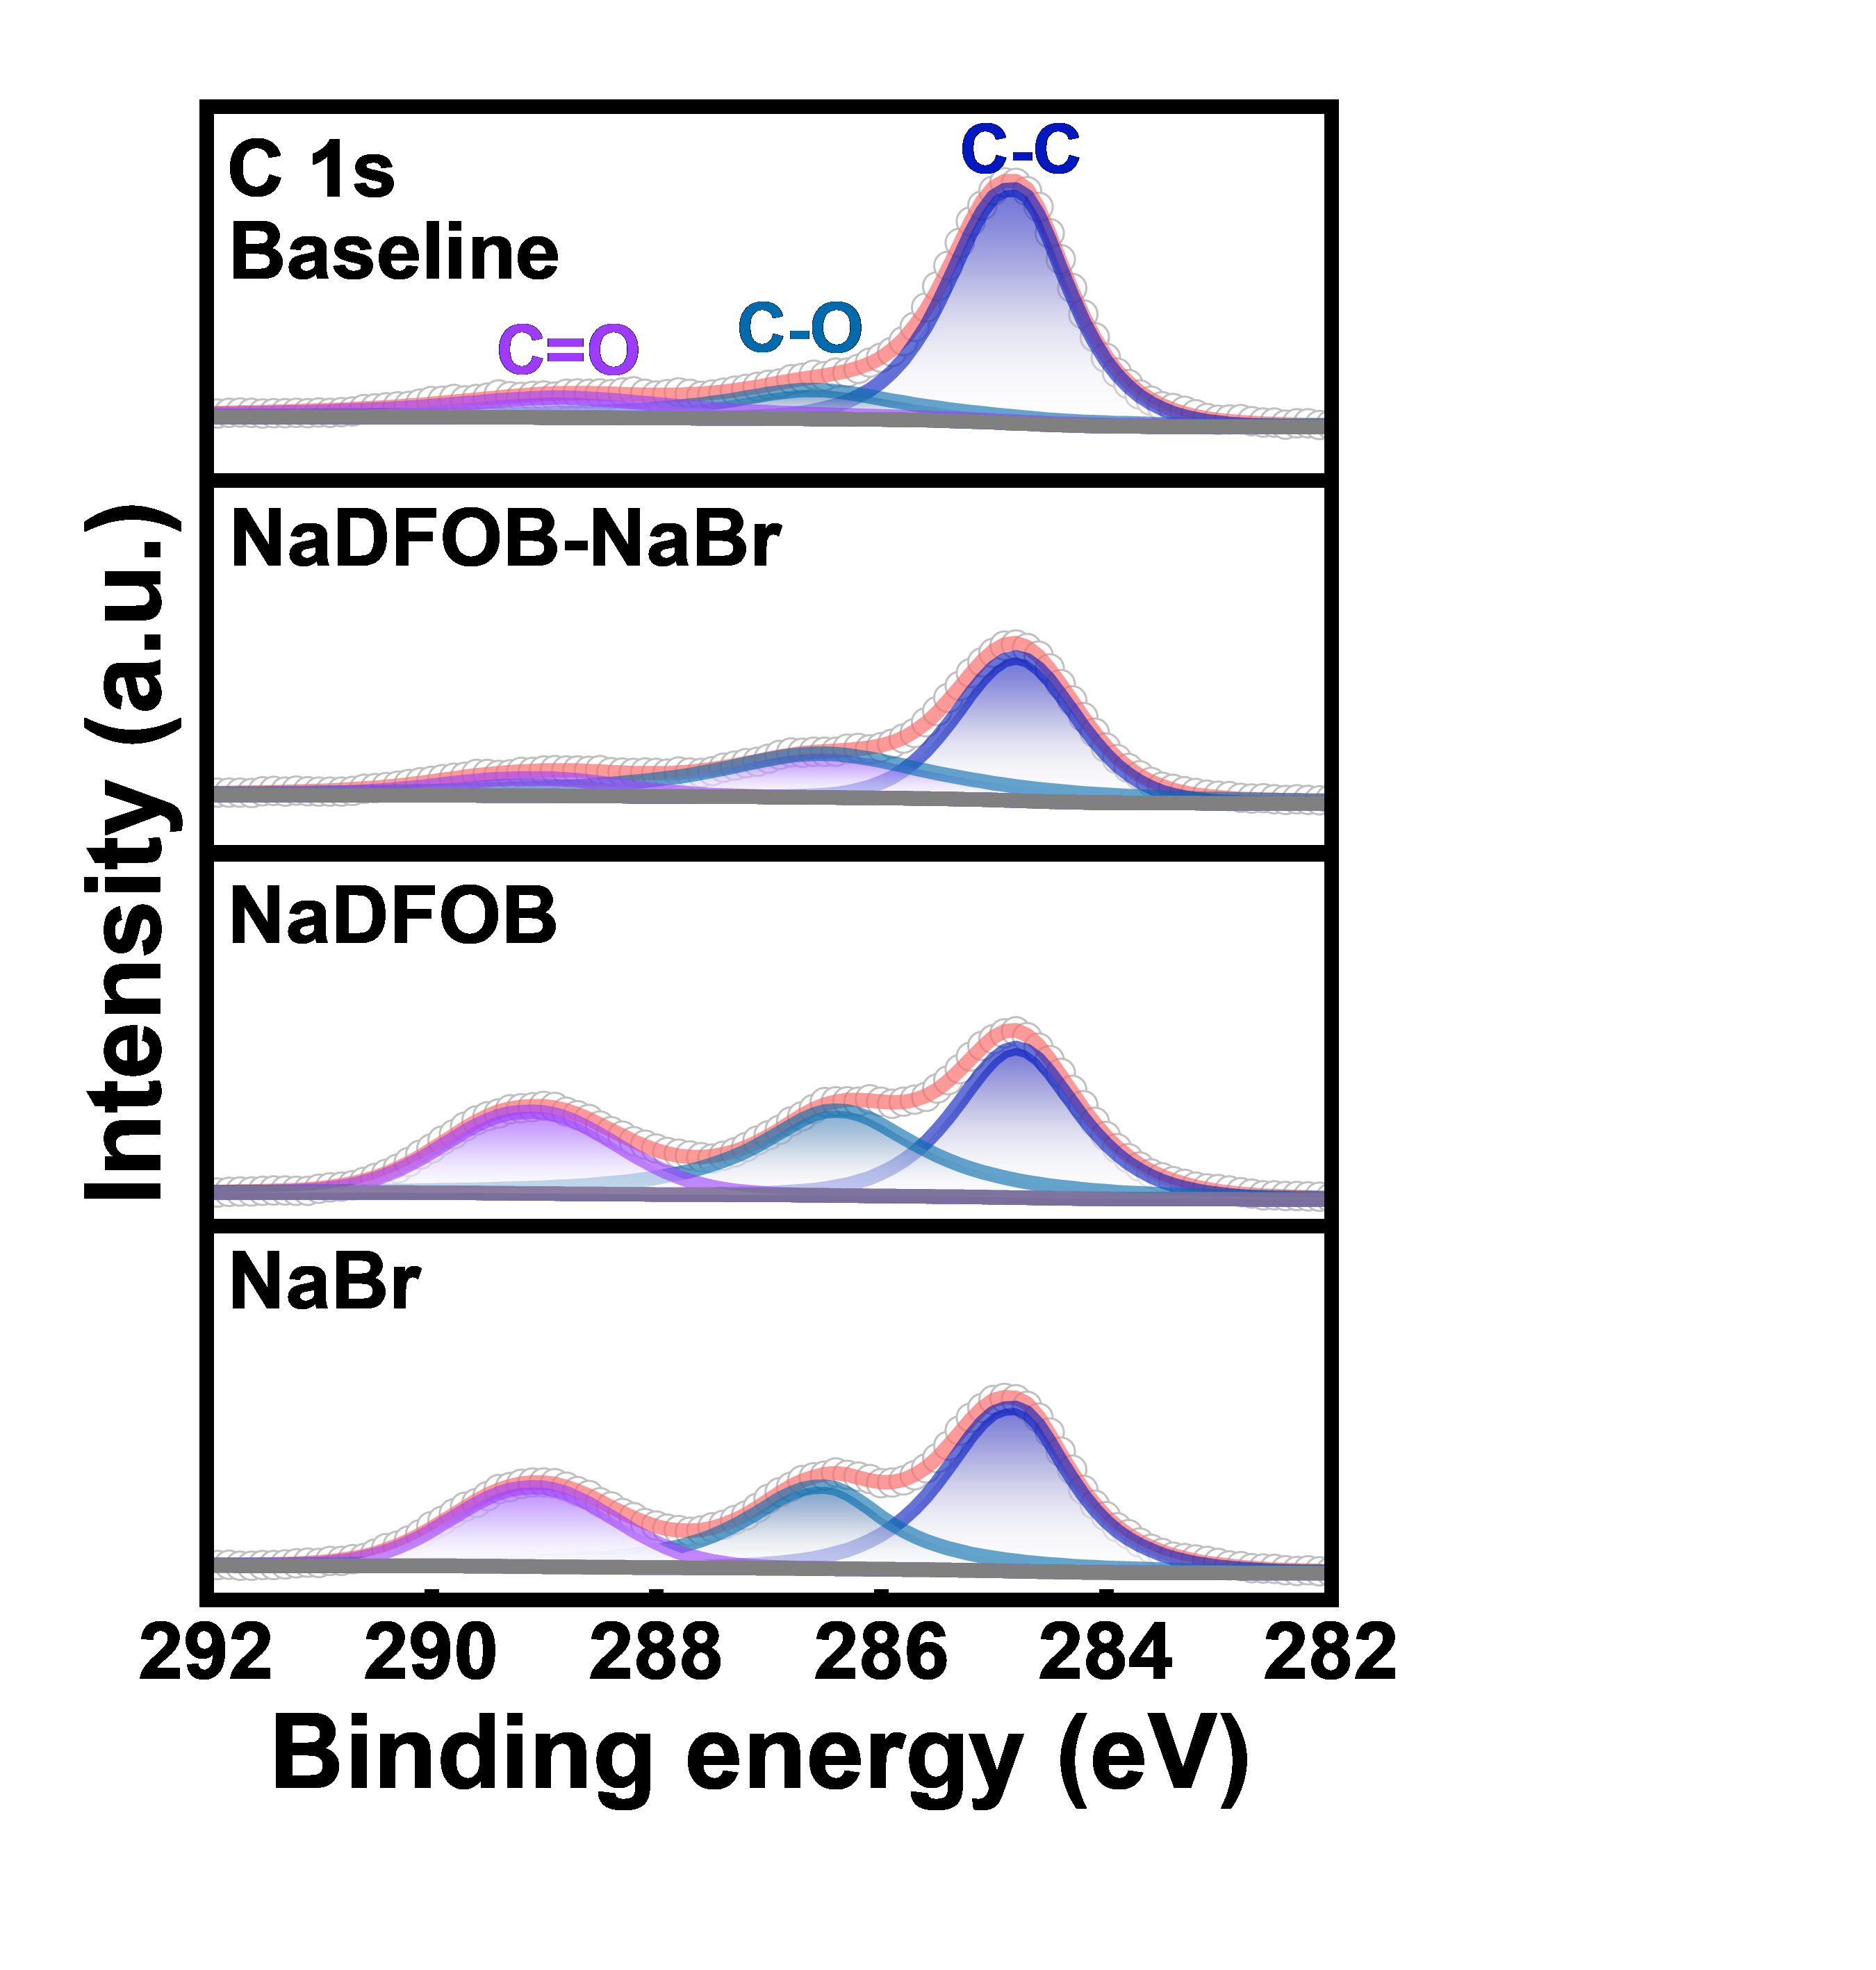


**Supplementary Fig. 27.** Normalized XPS fitting results of the C 1s peak.


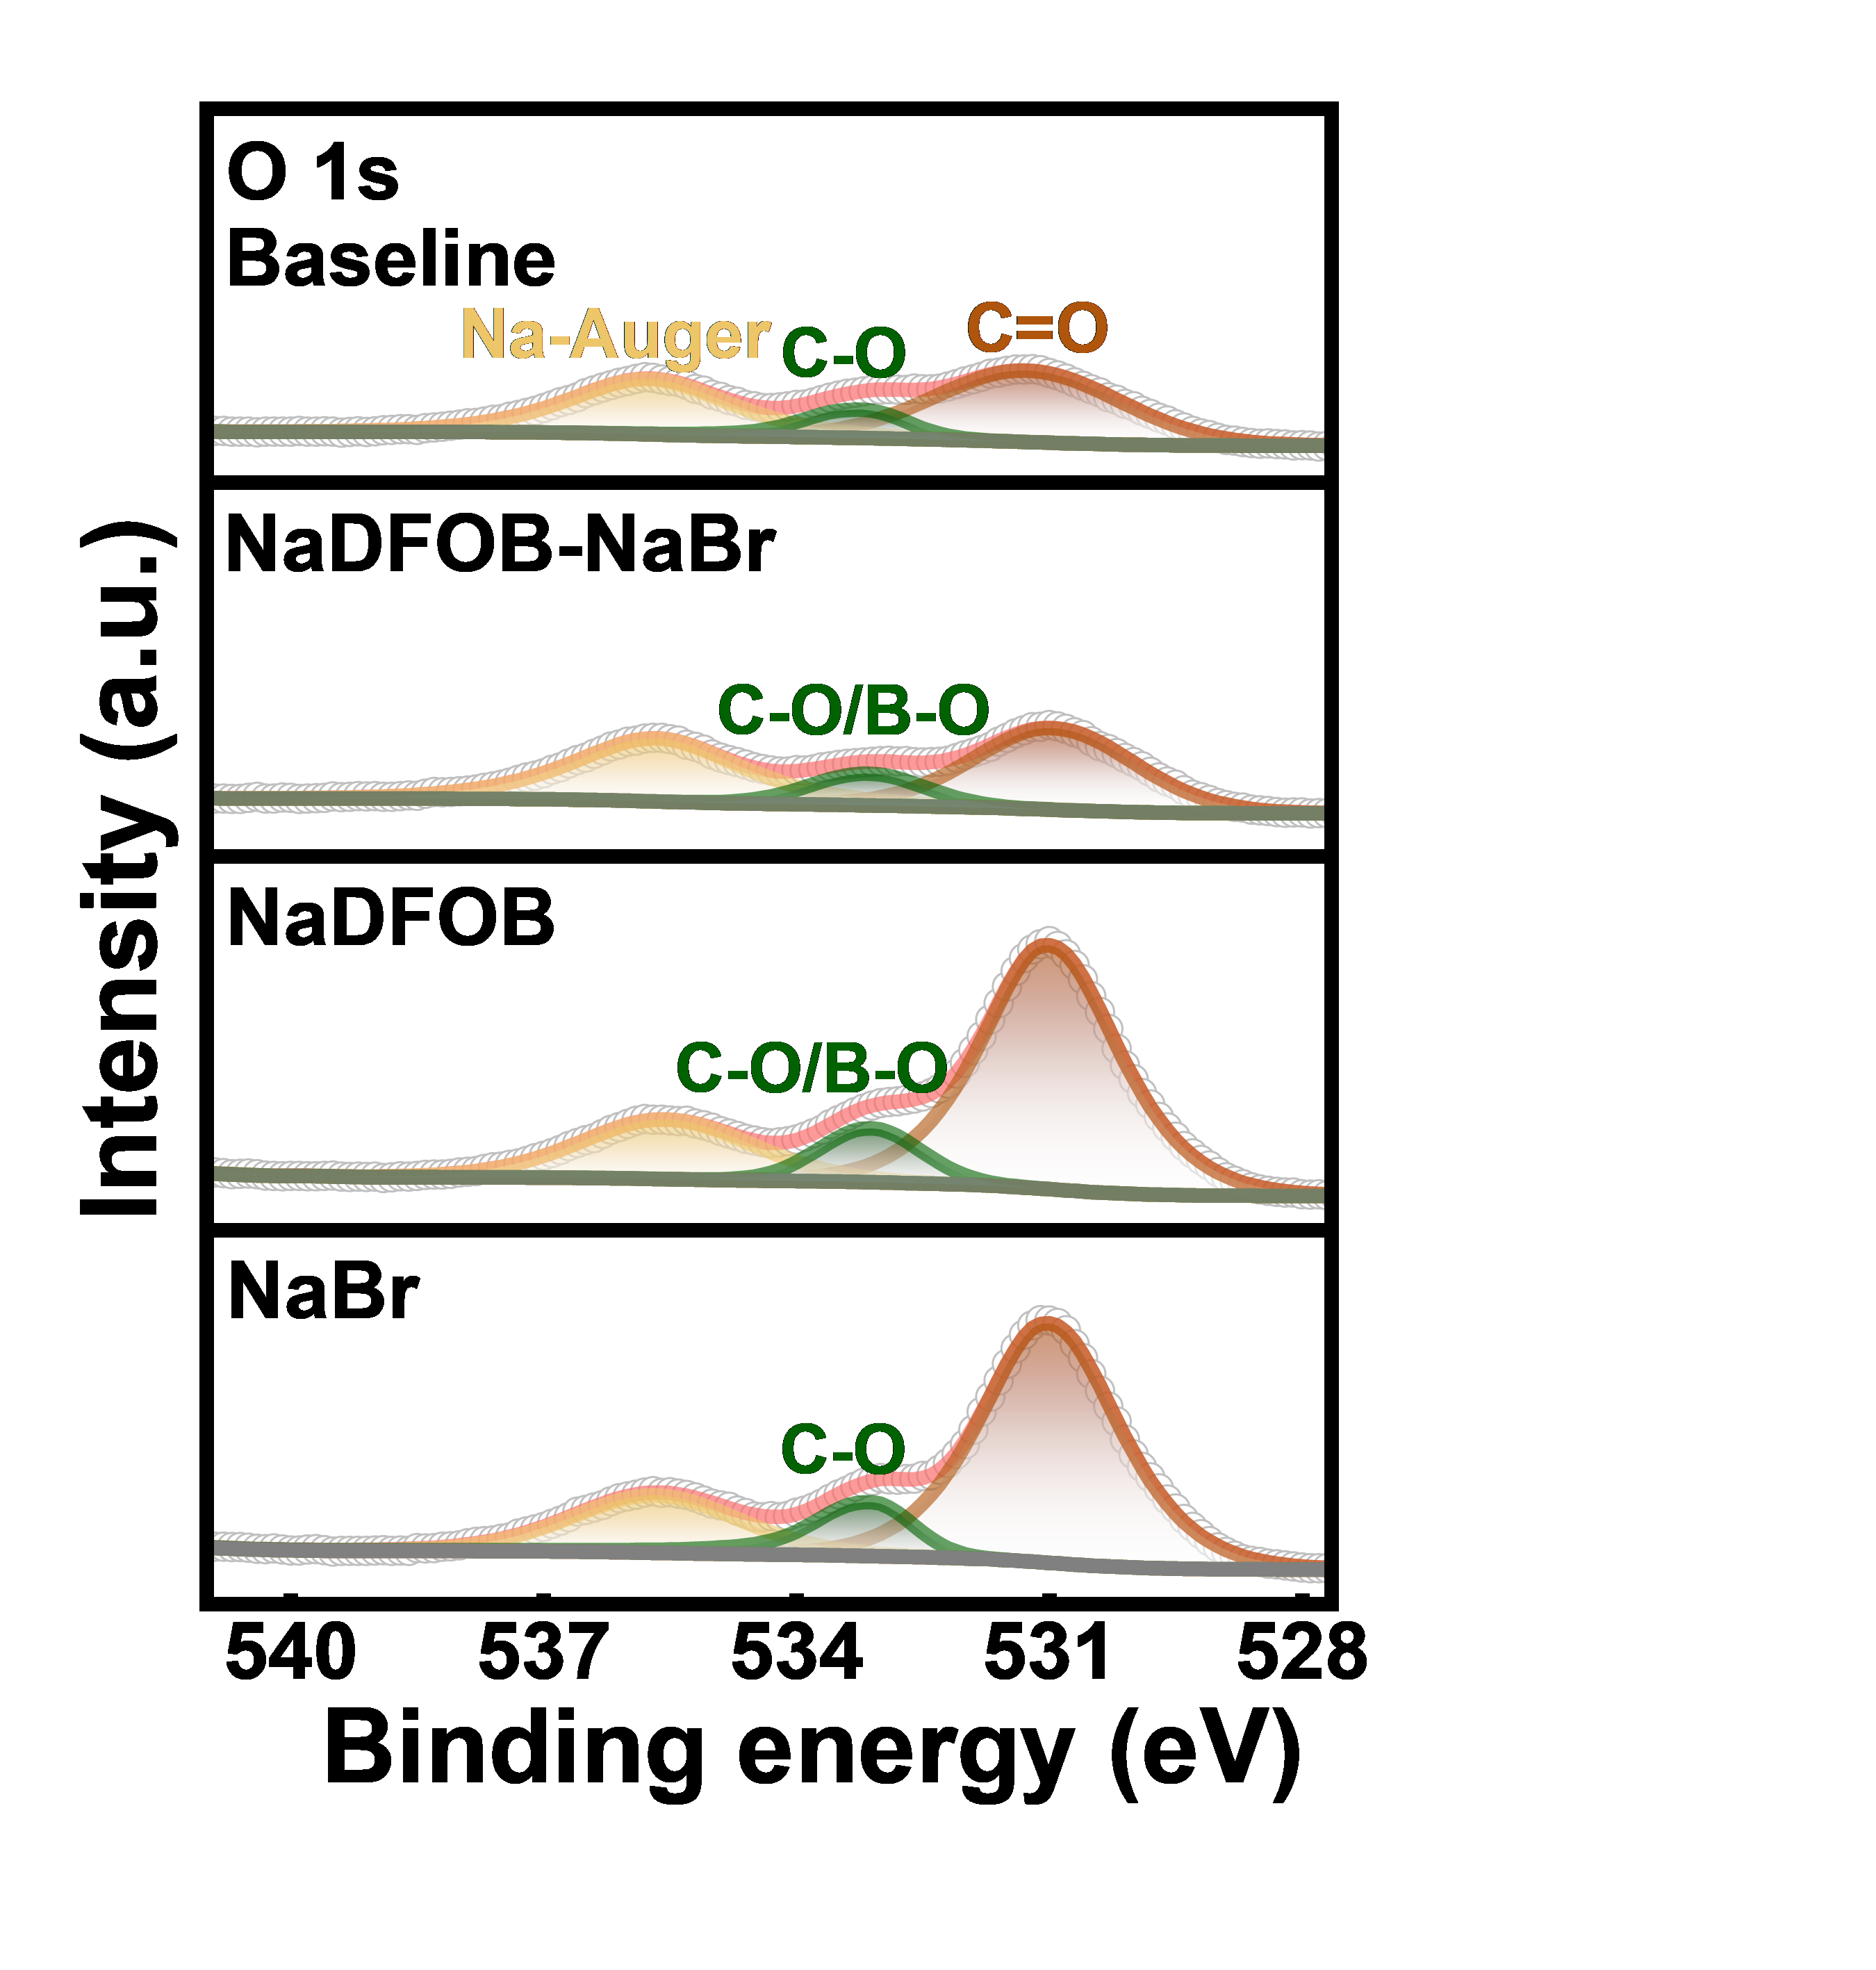


**Supplementary Fig. 28.** Normalized XPS fitting results of the O 1s peak.


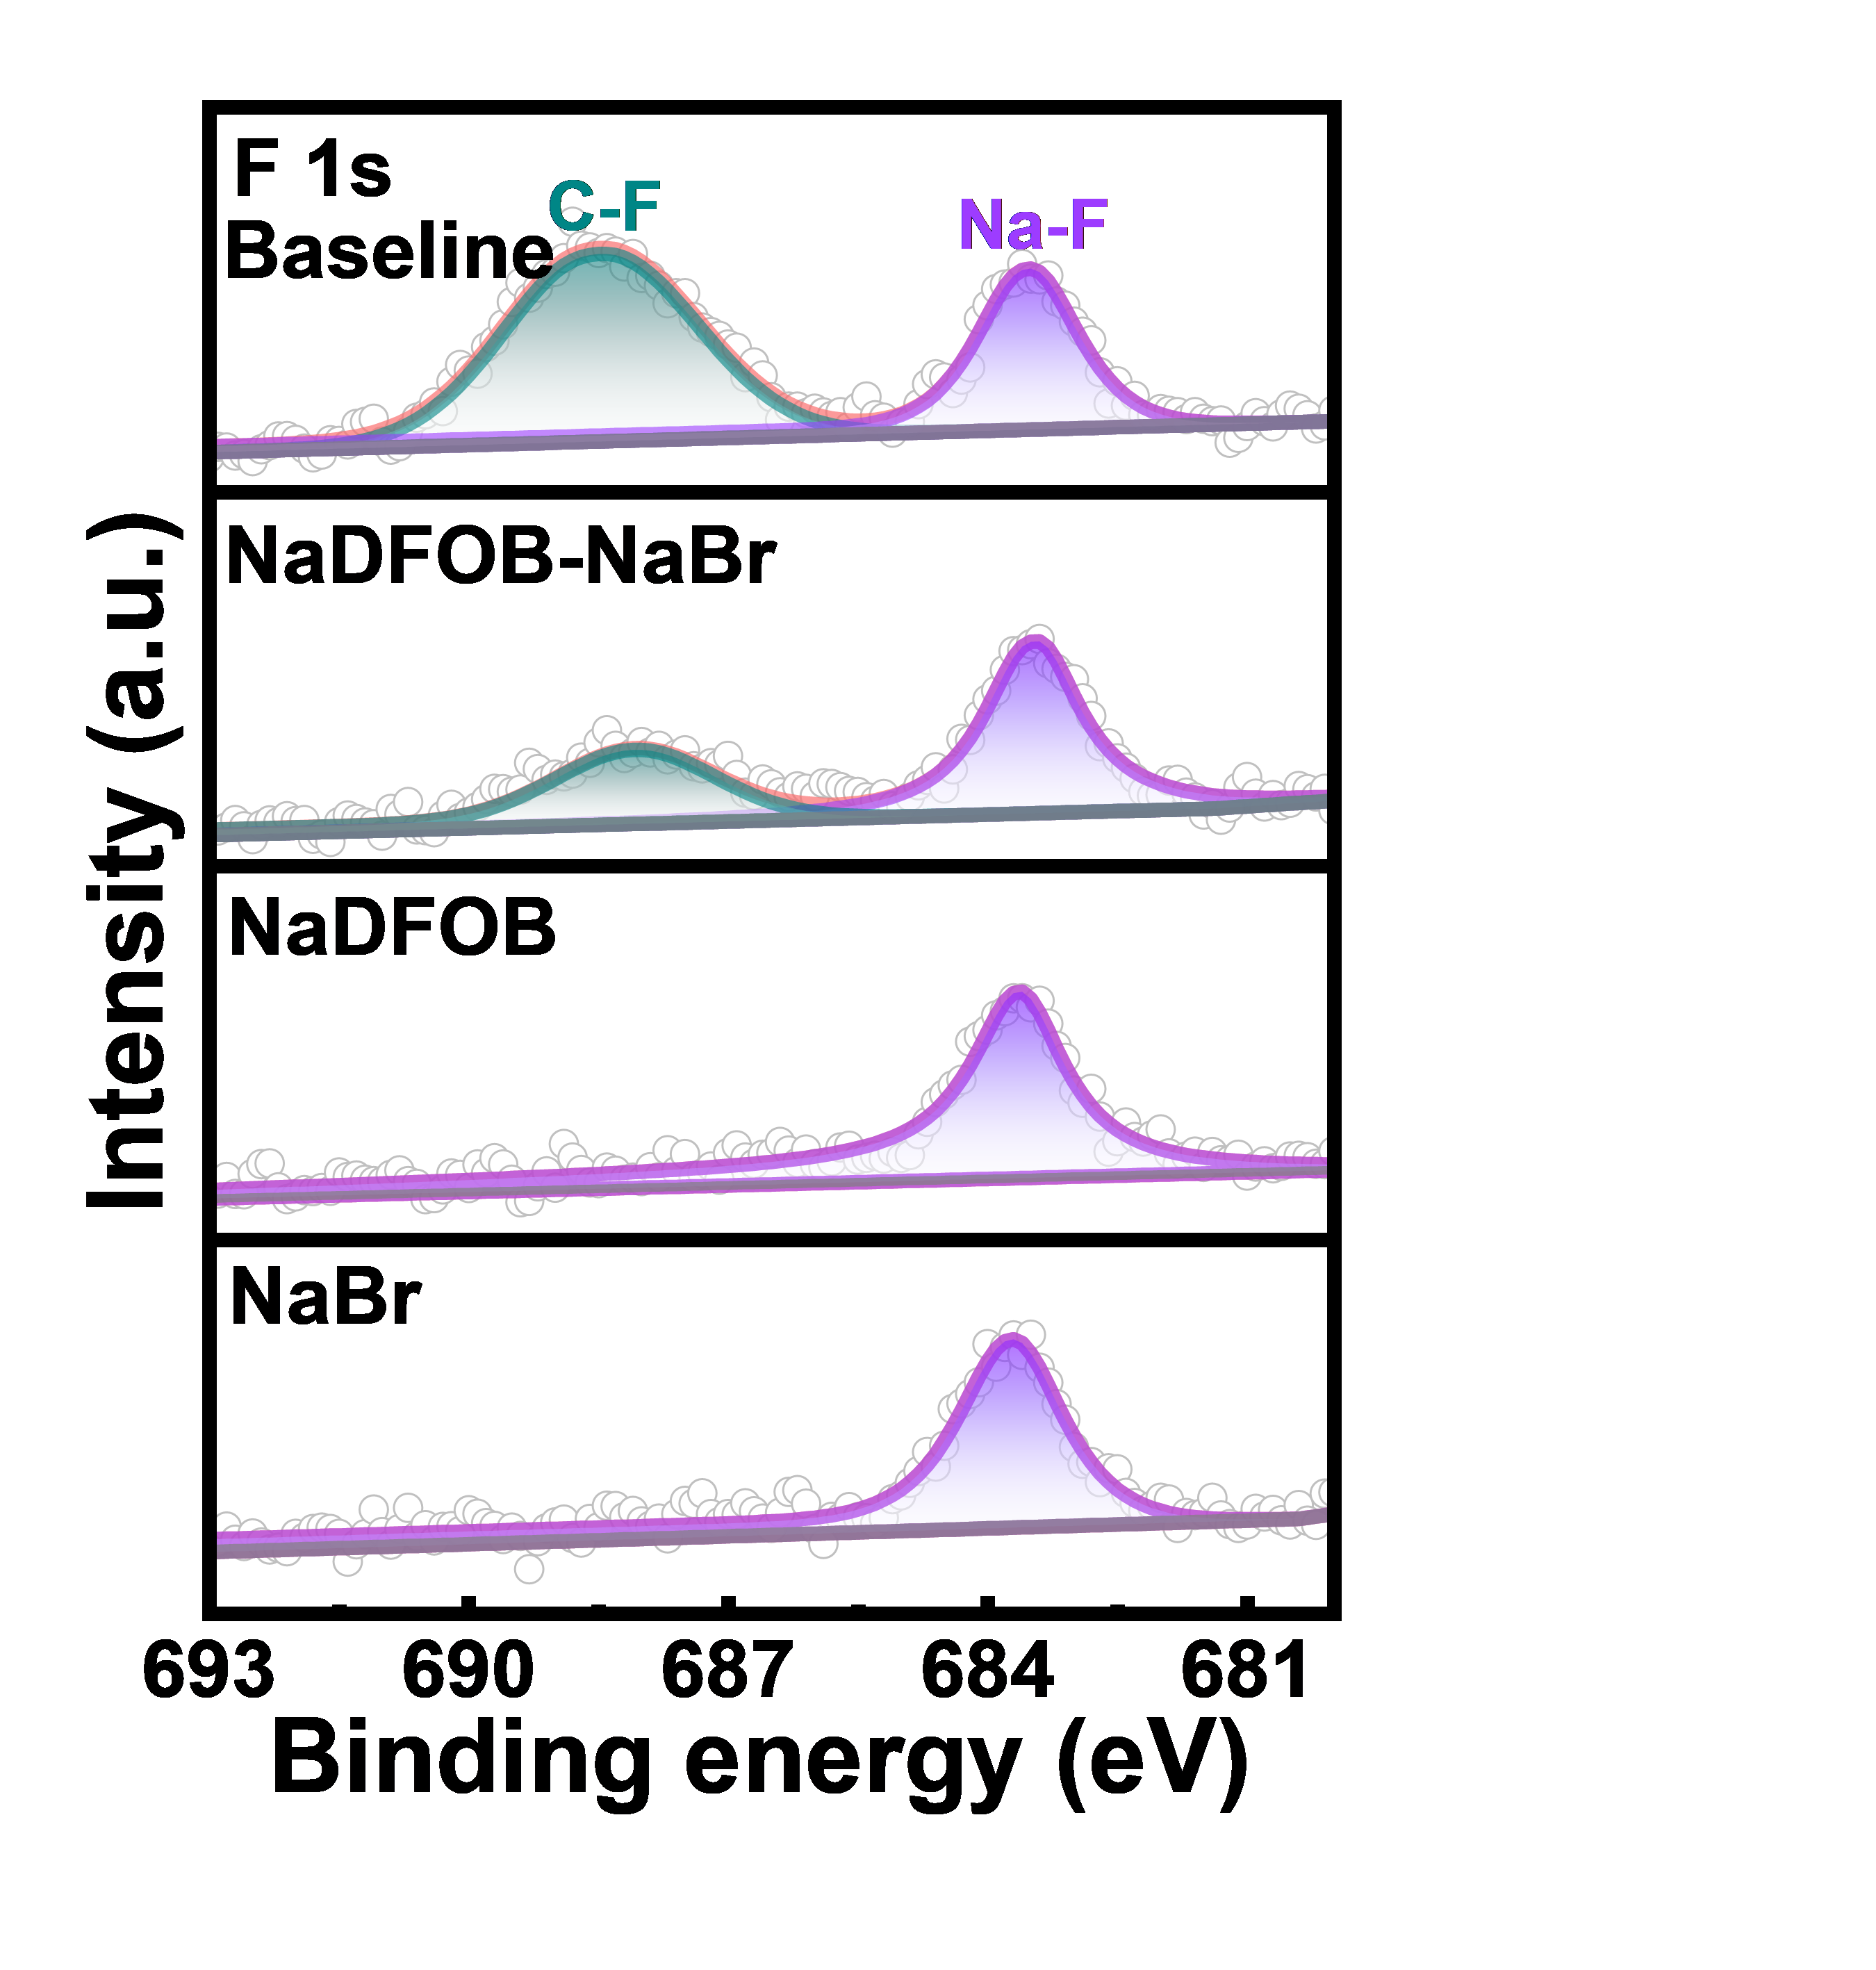


**Supplementary Fig. 29.** Normalized XPS fitting results of the F 1s peak.


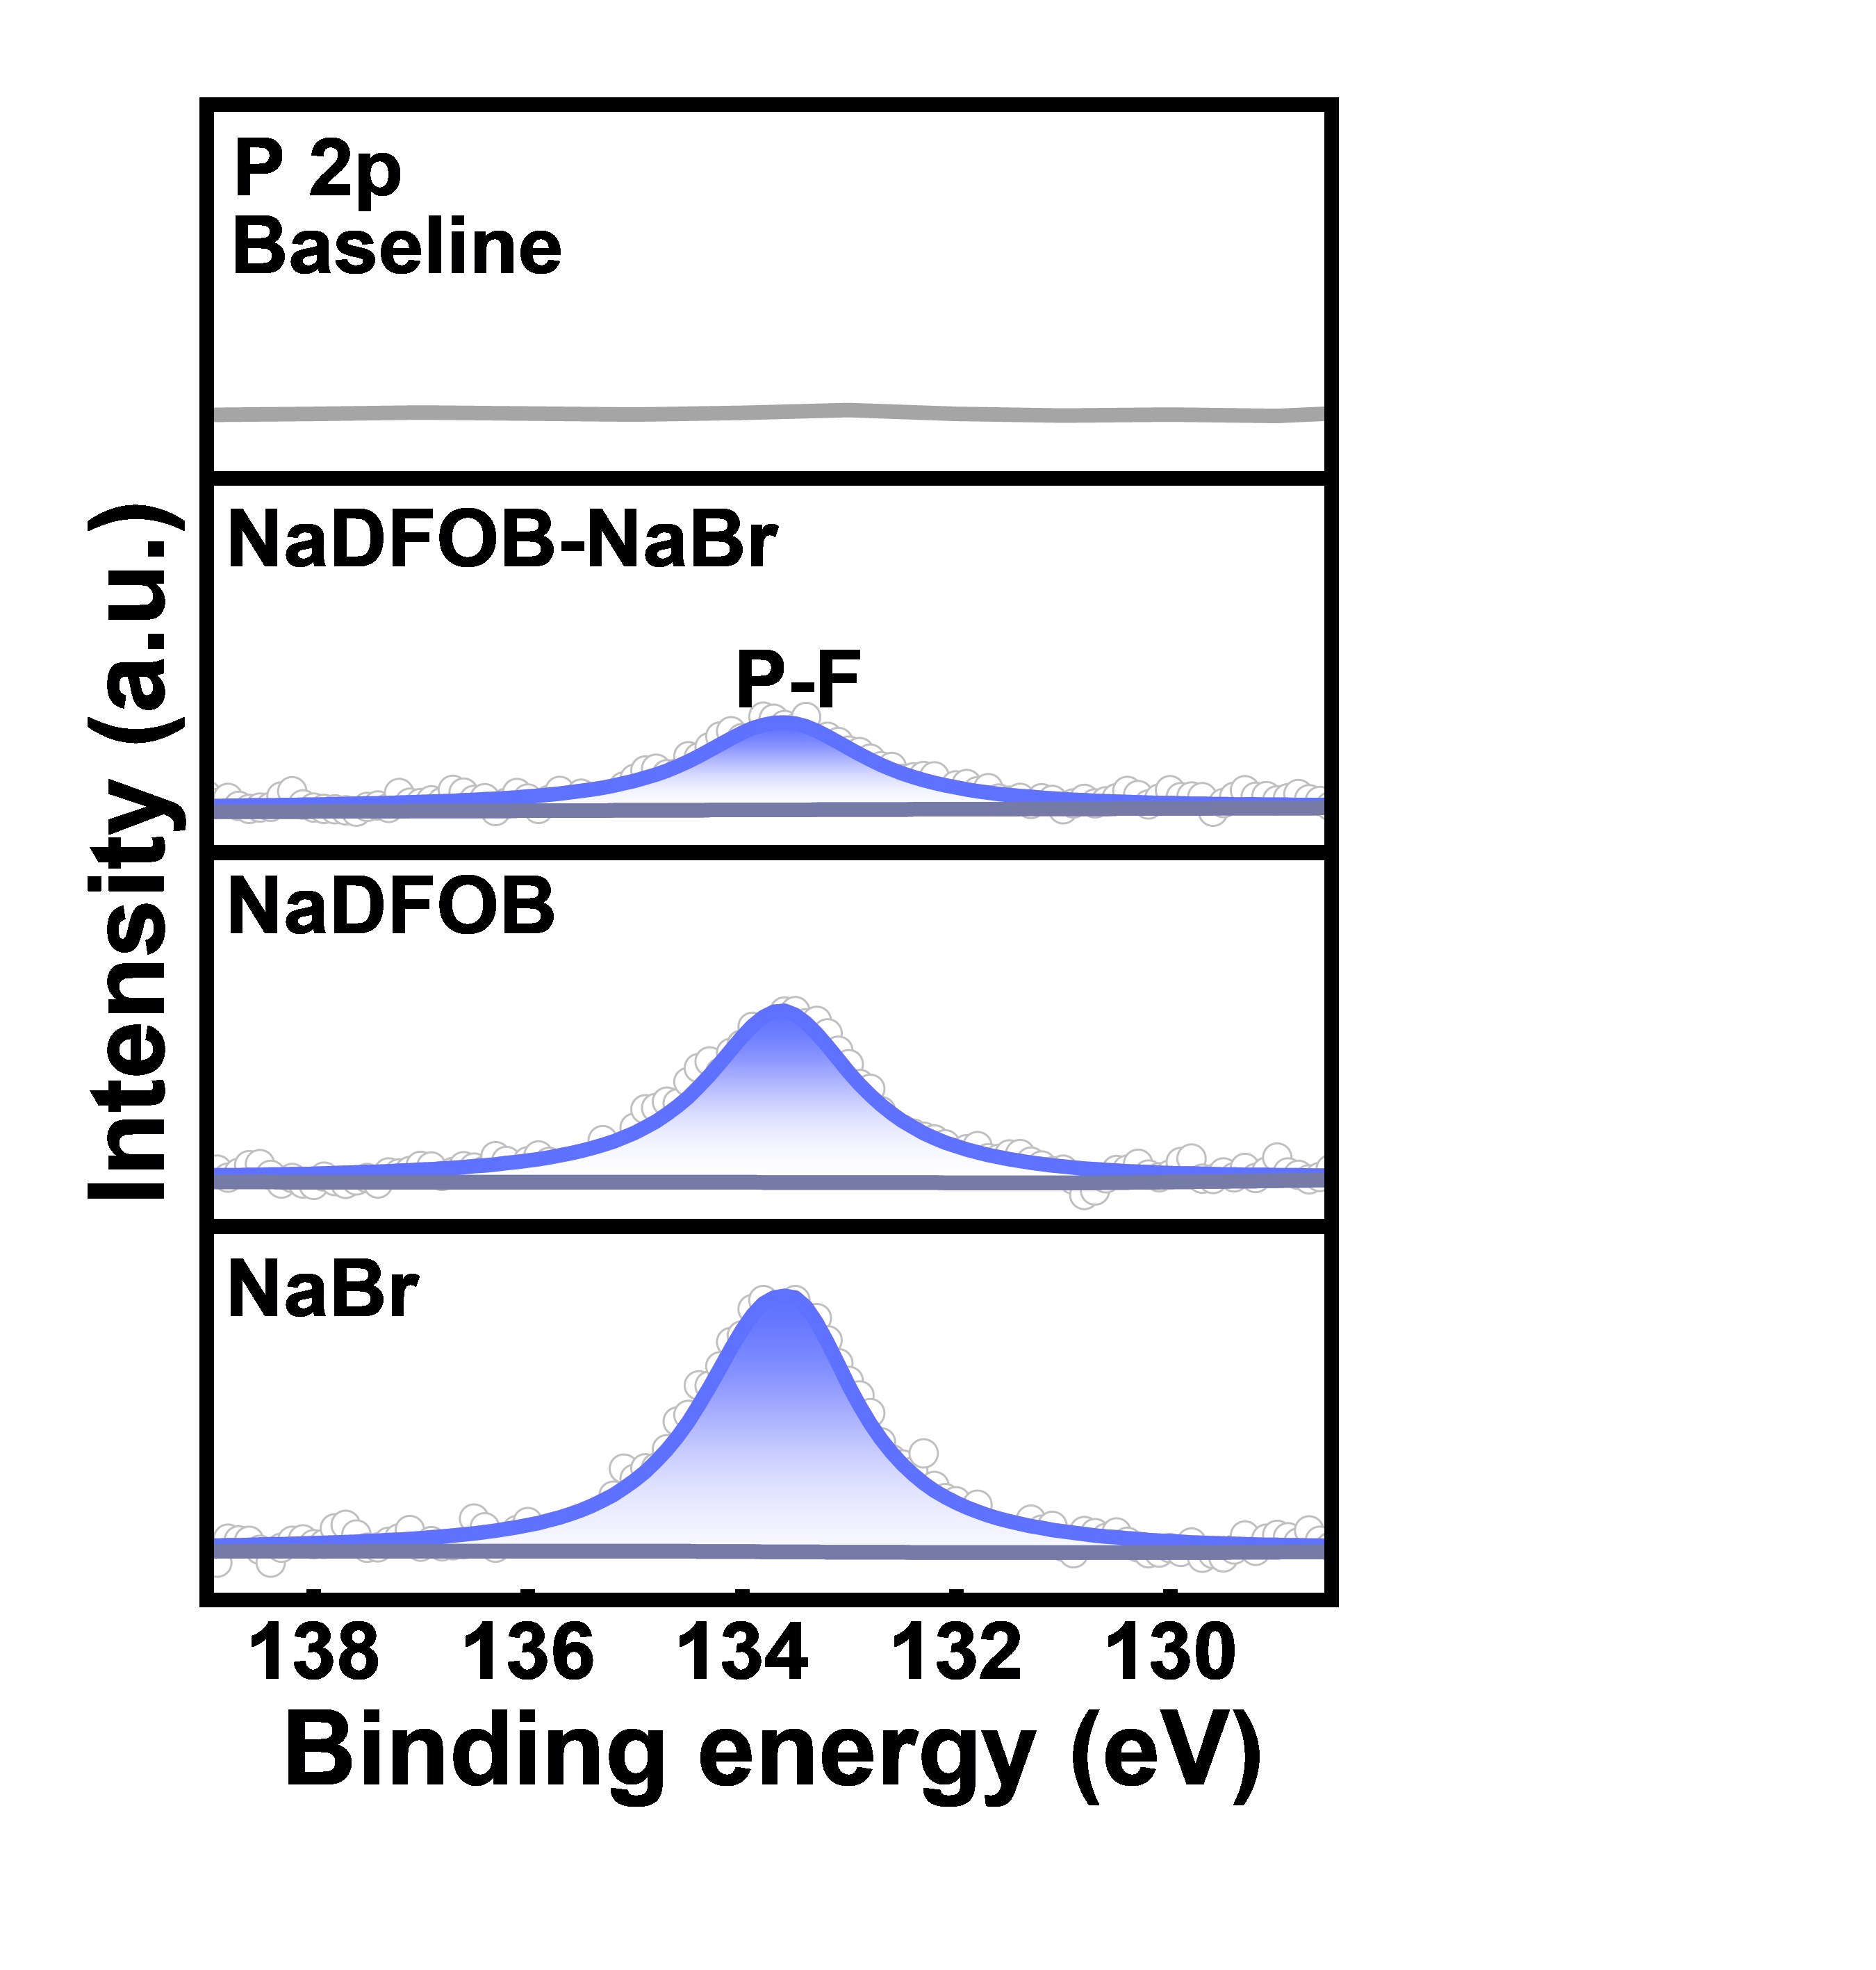


**Supplementary Fig. 30.** Normalized XPS fitting results of the P 2p peak.


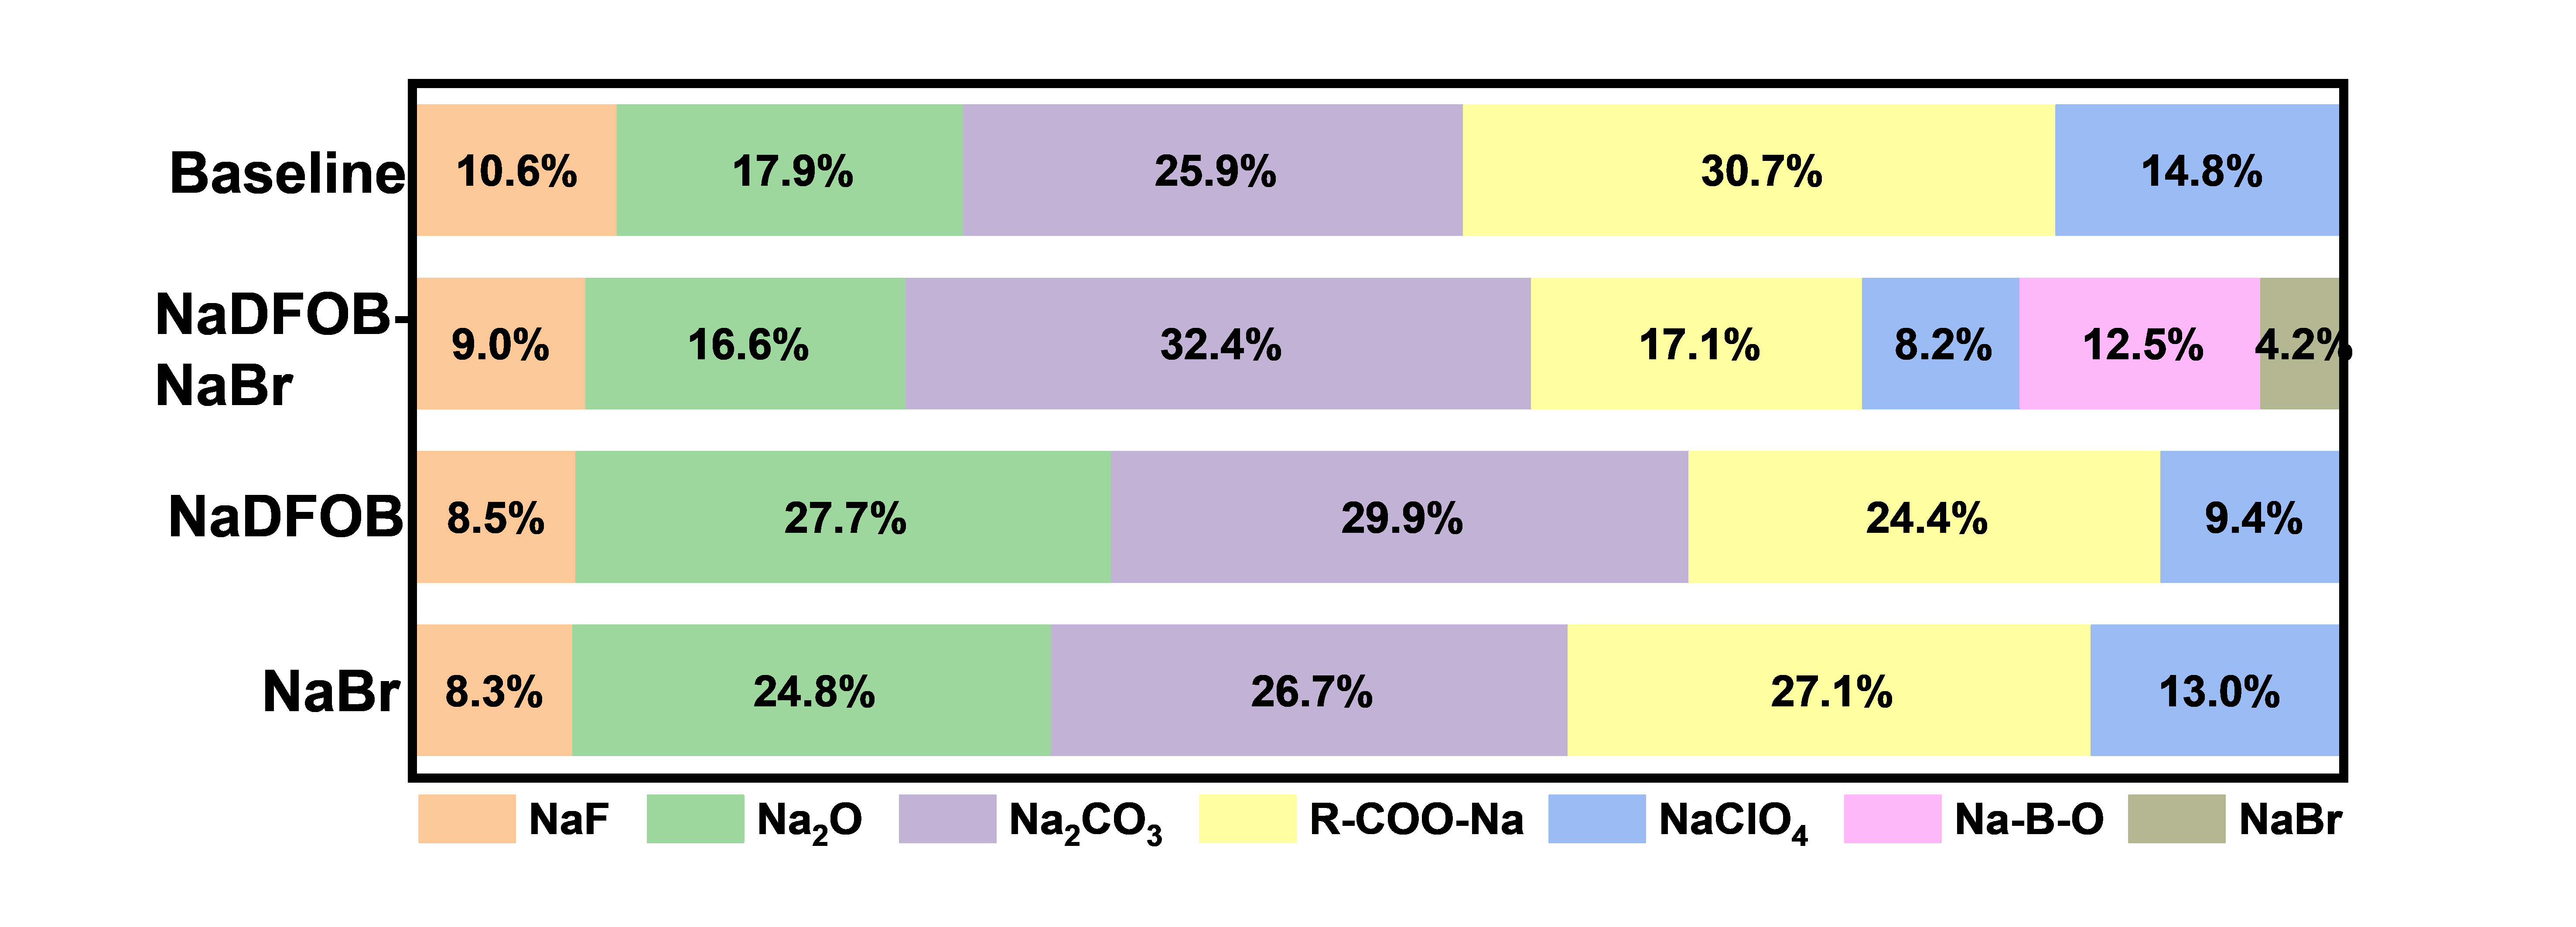


**Supplementary Fig. 31.** Quantitative comparison of SEI chemical components derived from the deconvolution of XPS Na 1s spectra for the four electrolytes.


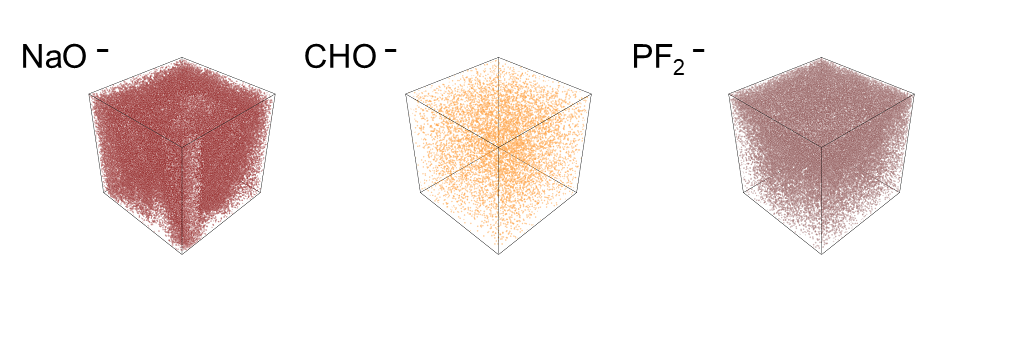


**Supplementary Fig. 32.** 3D reconstruction of selected secondary-ion fragments on the cycled HC anode in the NaDFOB-NaBr electrolyte (TOF-SIMS).


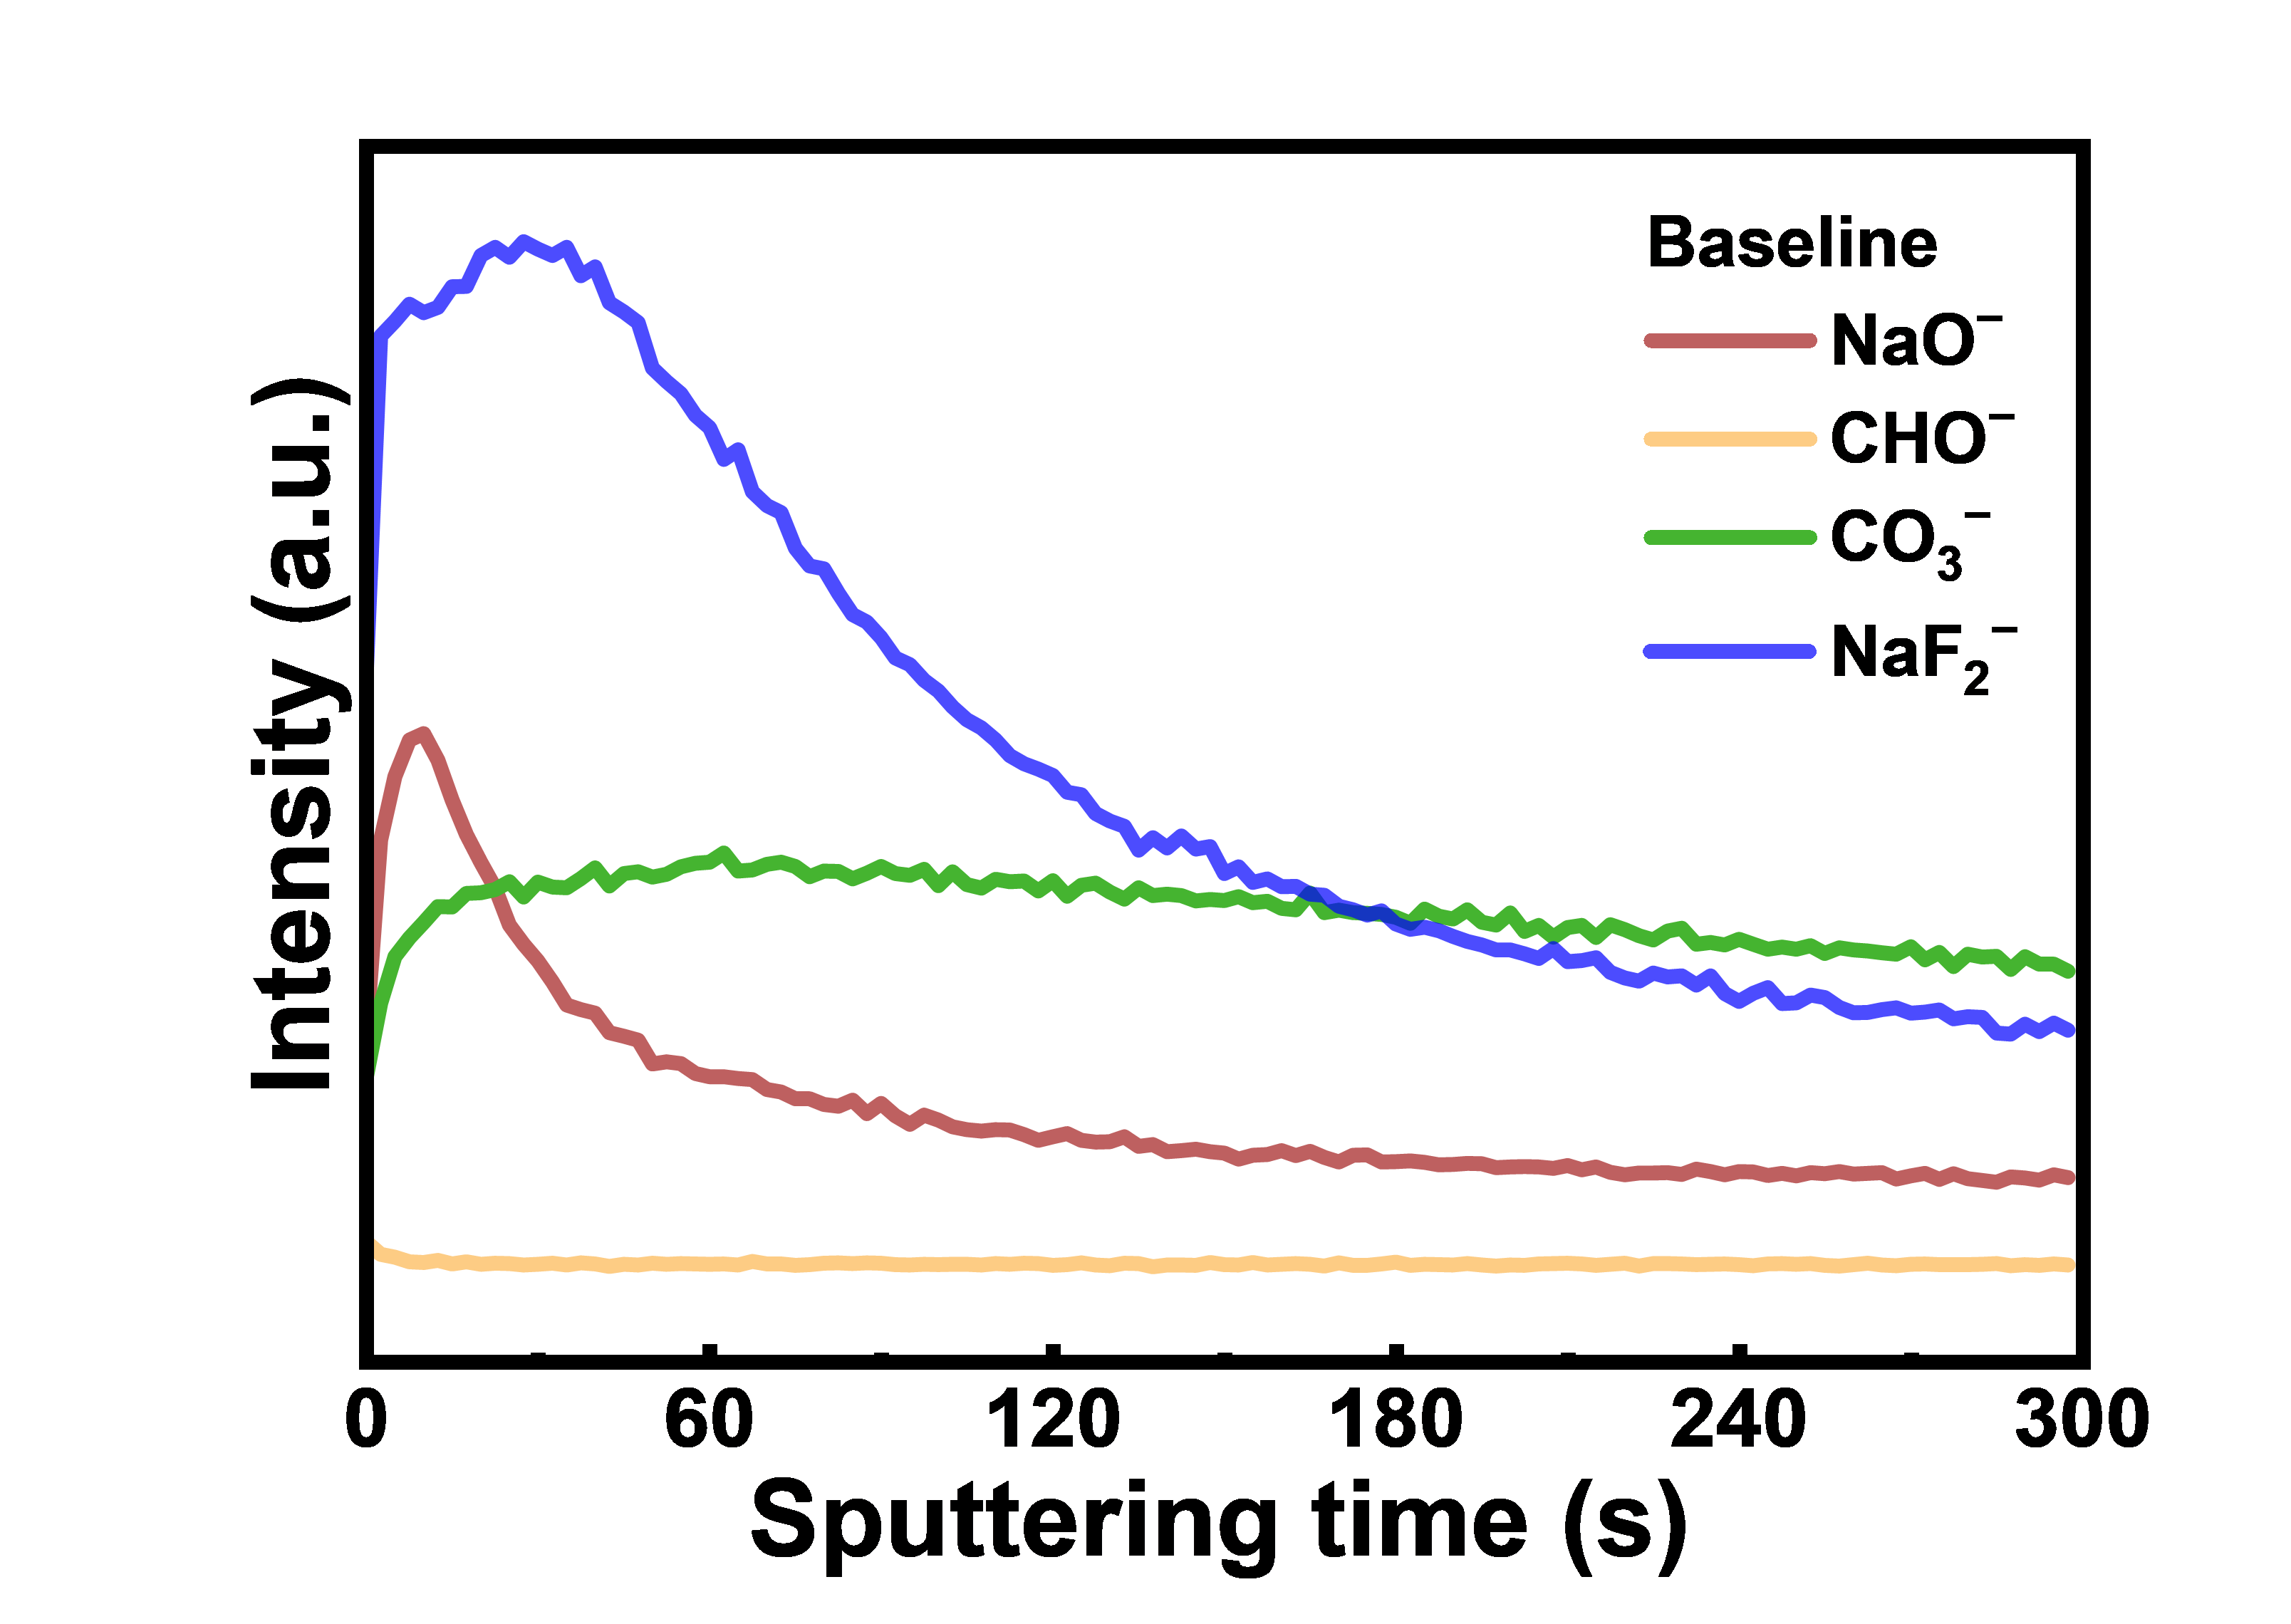


**Supplementary Fig. 33.** TOF-SIMS depth profiles of the cycled HC anode in the Baseline electrolyte.


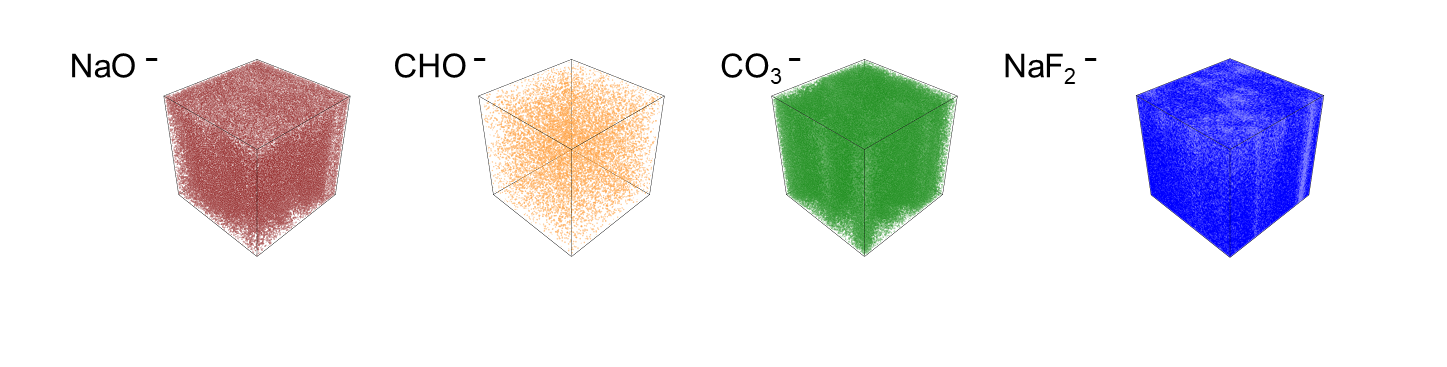


**Supplementary Fig. 34.** 3D reconstruction of selected secondary-ion fragments on the cycled HC anode in the Baseline electrolyte (TOF-SIMS).


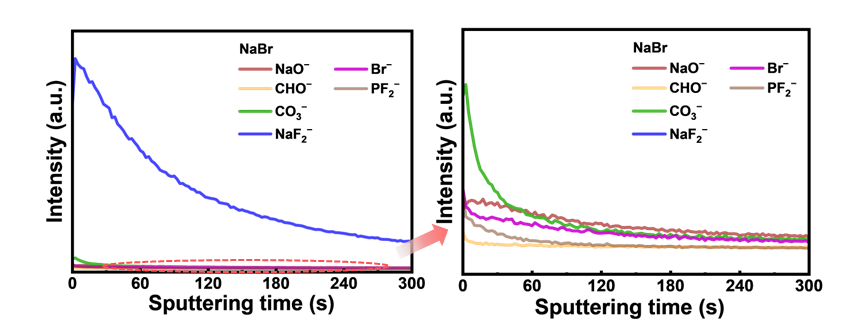


**Supplementary Fig. 35.** TOF-SIMS depth profiles of the cycled HC anode in the NaBr electrolyte.


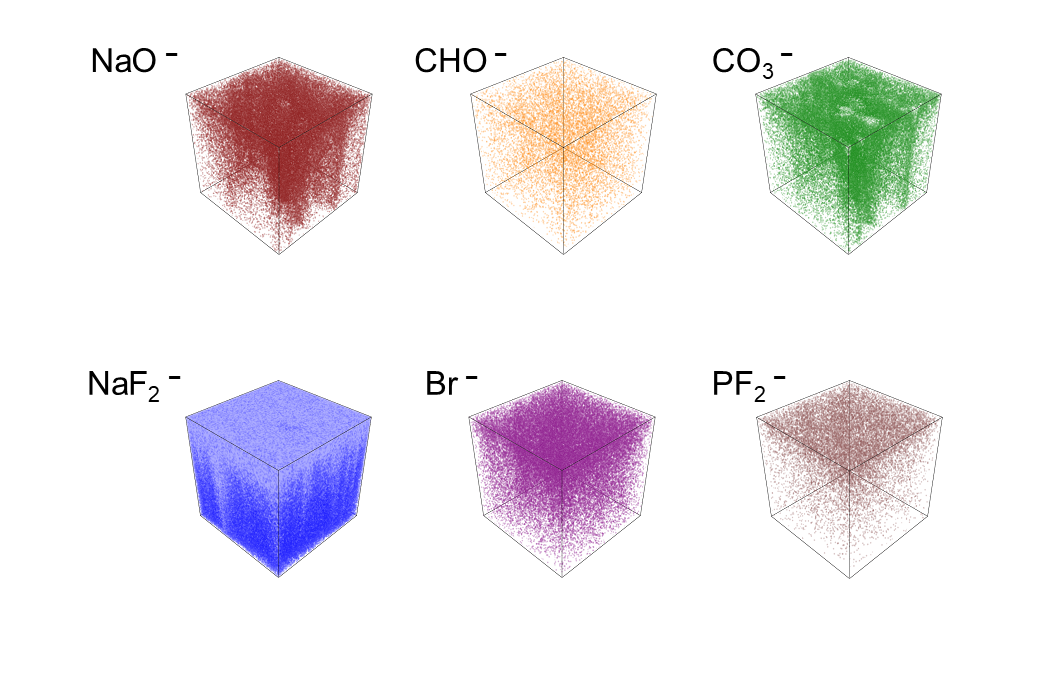


**Supplementary Fig. 36.** 3D reconstruction of selected secondary-ion fragments on the cycled HC anode in the NaBr electrolyte (TOF-SIMS).


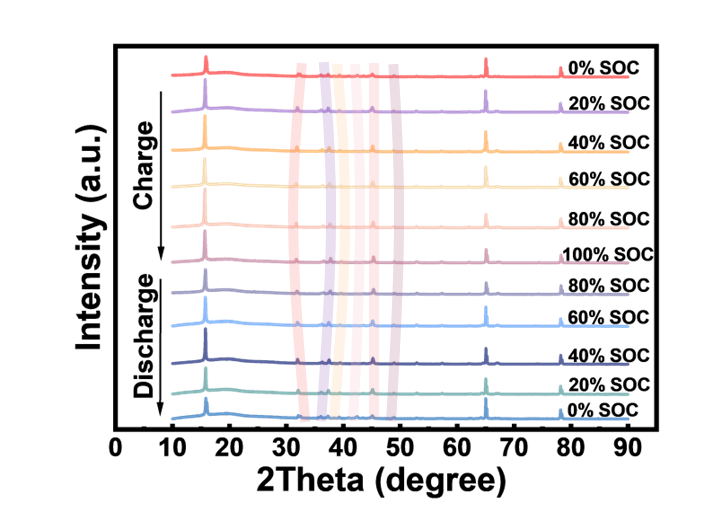


**Supplementary Fig. 37.** Ex situ XRD patterns of NMLTO cathode surface at different states of charge/discharge (SOC).


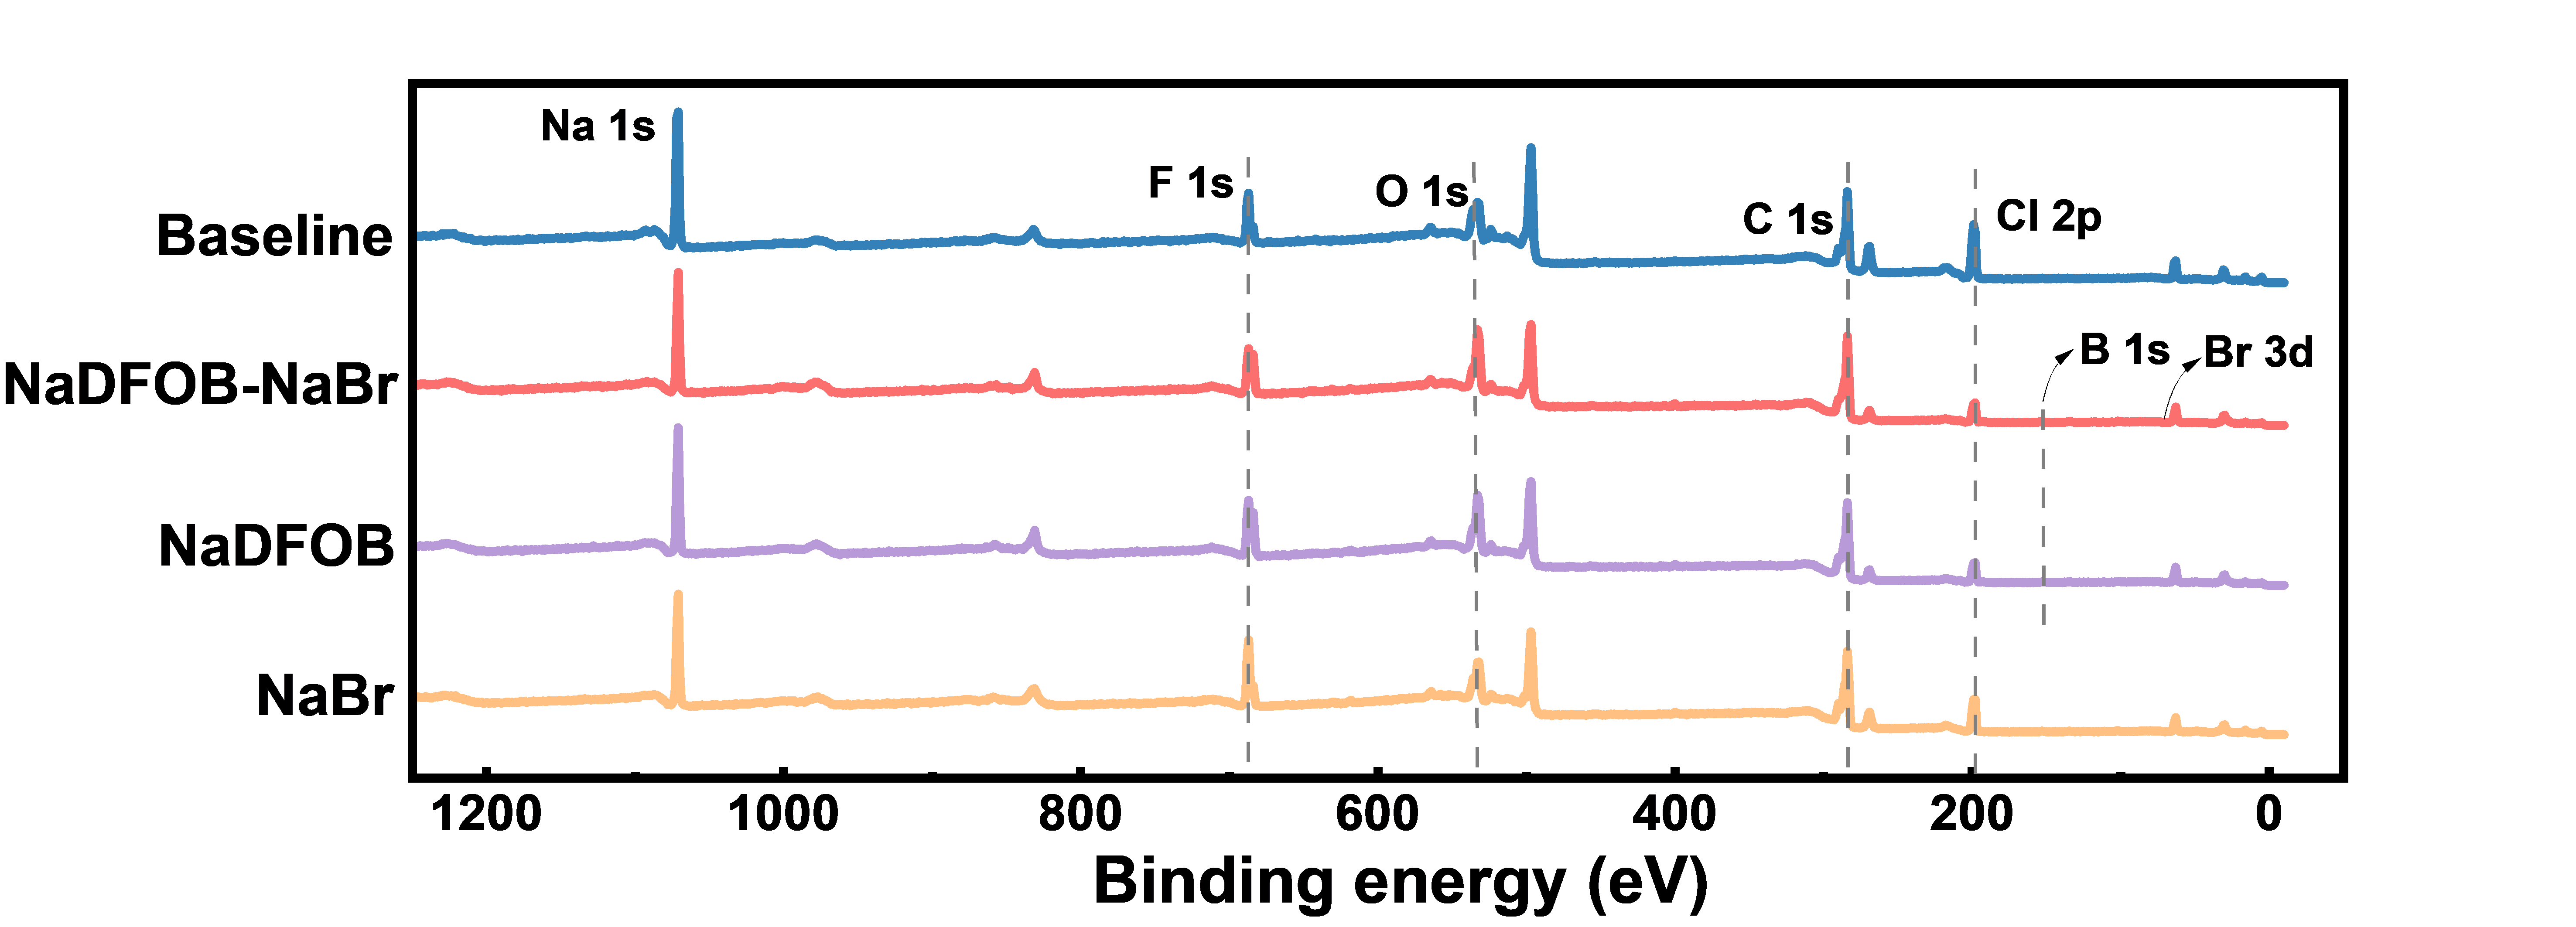


**Supplementary Fig. 38.** Survey XPS spectra of cycled NMLTO cathode surface.

**Supplementary Table 1.** Compositions of the four electrolytes.

| Electrolyte | NaClO4 | EC | DMC | FEC | TMP | NaDFOB | NaBr |
| --- | --- | --- | --- | --- | --- | --- | --- |
| Baseline | 1 M | 1 | 1 | 5 vol% | - | - | - |
| TMP-based (i) | - | - | - | - | 1 | 0.1 M | - |
| TMP-based (ii) | - | - | - | - | 1 | - | 0.01 M |
| TMP-based (iii) | - | - | - | - | 1 | 0.1 M | 0.01 M |

**Supplementary Table 2.** Physicochemical properties of the solvents used in the Baseline, NaDFOB-NaBr, NaDFOB, and NaBr electrolytes.

| Solvent  structure | Melting  Point  Tm (°C) | Boiling  Point  Tb (°C) | Viscosity  η (cP) | Dielectric  Constant ε (25 °C) | Density  ρ (g cm−3) | Donor  Number  DN (kcal  mol−1) |
| --- | --- | --- | --- | --- | --- | --- |
| EC | 36 | 248 | 1.90 (40 °C) | 89.8 | 1.321 | 16.4 |
| DMC | 4 | 90 | 0.59 | 3.1 | 1.069 | 17.2 |
| FEC | 18 | 212 | - | 7.0 | 1.454 | 9.1 |
| TMP | −46 | 197 | 1.1 | 20.6 | 1.215 | 23 |

**Supplementary Table 3.** Fitted parameters from the EIS spectra of Na||Na symmetric cells at various temperatures.

| Electrolyte | Temperaure (°C) | Rb (Ω) | RSEI (Ω) | Rct (Ω) |
| --- | --- | --- | --- | --- |
| Baseline | 20 | 1.931 | 575.2 | 1246 |
| 0 | 3.108 | 3474 | 4799 |
| −10 | 4.58 | 8246 | 71210 |
| −20 | 6.421 | 45880 | 252200 |
| NaDFOB-NaBr | 20 | 2.162 | 4936 | 1799 |
| 0 | 3.037 | 7164 | 2729 |
| −10 | 2.948 | 6880 | 5487 |
| −20 | 3.618 | 51070 | 15110 |
| NaDFOB | 20 | 9.084 | 4516 | 1735 |
| 0 | 2.971 | 5770 | 8410 |
| −10 | 3.299 | 5972 | 27410 |
| −20 | 3.787 | 24910 | 85130 |
| NaBr | 20 | 5.038 | 1733 | 4241 |
| 0 | 2.682 | 3700 | 8705 |
| −10 | 3.282 | 31810 | 18160 |
| −20 | 3.71 | 38800 | 59800 |

**Supplementary Table 4.** Coordination numbers of Na+ with solvent molecules and anions in different electrolytes derived from MD simulations.

|  | Baseline | NaDFOB-NaBr | NaDFOB | NaBr |
| --- | --- | --- | --- | --- |
| ClO4− | 0.63472 | 0.49635 | 0.50011 | 0.58452 |
| DMC | 0.21733 | 0.19705 | 0.169 | 0.18689 |
| EC | 1.6655 | 1.27741 | 1.22297 | 1.37047 |
| FEC | 0.00594 | 0.00773 | 0.00382 | 0.00499 |
| TMP | - | 0.91413 | 0.91106 | 0.87793 |
| DFOB− | - | 0.03656 | 0.02526 | - |
| Br− | - | 0.02246 | - | 0.02514 |
